# Supplementary material for: Ca2+/CaM binding to CaMKI promotes IMA-3 importin binding and nuclear translocation in sensory neurons to control behavioral adaptation
Source: eLife. 2021 Nov 12;10:e71443. doi: 10.7554/eLife.71443 (PMC8635976; doi:10.7554/eLife.71443)
Supplement: Figure 1—source data 1. [file elife-71443-fig1-data1.xlsx]

## Sheet: Figure 1-source data
Summary statistics reported in the main figure
CMK-1 transgene	Drug treatment	Time (min)	Temperature (°C)	Mean ratio	SEM ratio
CMK-1(wt)	none	30	20	0.744756	0.0216012
CMK-1(wt)	none	45	20	0.749064	0.0373422
CMK-1(wt)	none	60	20	0.758004	0.039747
CMK-1(wt)	none	75	20	0.748446	0.0262422
CMK-1(wt)	none	90	20	0.781755	0.0563285
CMK-1(wt)	none	120	20	0.788321	0.0650155
CMK-1(wt)	none	10	28	0.753763	0.0509033
CMK-1(wt)	none	30	28	0.764957	0.0252184
CMK-1(wt)	none	45	28	0.880959	0.0339906
CMK-1(wt)	none	60	28	0.972912	0.0355473
CMK-1(wt)	none	75	28	1.0189	0.0372246
CMK-1(wt)	none	90	28	1.10337	0.0442172
CMK-1(wt)	none	120	28	1.13807	0.0259153
CMK-1(wt)	none	90	20	0.744428	0.0124908
CMK-1(V292A/V294A)	none	90	20	1.17835	0.0187468
CMK-1(D288-294)	none	90	20	1.20164	0.0406925
CMK-1(I315A)	none	90	20	0.711317	0.0129949
CMK-1(L321A/L323A)	none	90	20	0.816132	0.0130284
CMK-1(I315A/L321A/L323A)	none	90	20	0.753874	0.014121
CMK-1(D318-324)	none	90	20	0.790523	0.0209146
CMK-1(D315-323)	none	90	20	0.802279	0.0155007
CMK-1(wt)	none	90	28	1.06469	0.0160771
CMK-1(V292A/V294A)	none	90	28	1.06805	0.0168017
CMK-1(D288-294)	none	90	28	1.16255	0.032419
CMK-1(I315A)	none	90	28	0.794064	0.0229067
CMK-1(L321A/L323A)	none	90	28	0.911061	0.0127769
CMK-1(I315A/L321A/L323A)	none	90	28	0.793241	0.0128299
CMK-1(D318-324)	none	90	28	0.824243	0.0235818
CMK-1(D315-323)	none	90	28	0.843921	0.0154697
CMK-1(K71A)	none	90	20	0.764918	0.0149659
CMK-1(R74Q)	none	90	20	0.774725	0.0163772
CMK-1(R77S)	none	90	20	0.754398	0.0109205
CMK-1(K71A/R74Q/R77S)	none	90	20	0.721552	0.00954859
CMK-1(K307Q)	none	90	20	0.766792	0.0114067
CMK-1(R302S/K307Q)	none	90	20	0.741619	0.0121642
CMK-1(K71A)	none	90	28	0.880756	0.0162151
CMK-1(R74Q)	none	90	28	0.858464	0.0151103
CMK-1(R77S)	none	90	28	0.681234	0.0119897
CMK-1(K71A/R74Q/R77S)	none	90	28	0.682403	0.00988317
CMK-1(K307Q)	none	90	28	0.874214	0.00949451
CMK-1(R302S/K307Q)	none	90	28	0.880092	0.0122736
CMK-1(wt)	vehicle	90	20	0.864874	0.0321118
CMK-1(wt)	Leptomycin B	90	20	1.05023	0.032549
Raw data kinetics
CMK-1 transgene	Drug treatment	Time (min)	Temperature (°C)	Ratio
CMK-1(wt)	none	10	28	0.752317
CMK-1(wt)	none	10	28	1.13729
CMK-1(wt)	none	10	28	0.827532
CMK-1(wt)	none	10	28	1.21487
CMK-1(wt)	none	10	28	0.766575
CMK-1(wt)	none	10	28	0.493957
CMK-1(wt)	none	10	28	0.563998
CMK-1(wt)	none	10	28	0.654755
CMK-1(wt)	none	10	28	0.758159
CMK-1(wt)	none	10	28	0.727219
CMK-1(wt)	none	10	28	0.525716
CMK-1(wt)	none	10	28	0.699318
CMK-1(wt)	none	10	28	0.959719
CMK-1(wt)	none	10	28	0.549793
CMK-1(wt)	none	10	28	0.699657
CMK-1(wt)	none	10	28	0.729329
CMK-1(wt)	none	30	20	0.416009
CMK-1(wt)	none	30	20	0.500904
CMK-1(wt)	none	30	20	0.560264
CMK-1(wt)	none	30	20	0.563622
CMK-1(wt)	none	30	20	0.566876
CMK-1(wt)	none	30	20	0.568297
CMK-1(wt)	none	30	20	0.604888
CMK-1(wt)	none	30	20	0.611589
CMK-1(wt)	none	30	20	0.617918
CMK-1(wt)	none	30	20	0.627717
CMK-1(wt)	none	30	20	0.639962
CMK-1(wt)	none	30	20	0.647401
CMK-1(wt)	none	30	20	0.65904
CMK-1(wt)	none	30	20	0.670712
CMK-1(wt)	none	30	20	0.686737
CMK-1(wt)	none	30	20	0.701795
CMK-1(wt)	none	30	20	0.7058
CMK-1(wt)	none	30	20	0.711982
CMK-1(wt)	none	30	20	0.716244
CMK-1(wt)	none	30	20	0.735885
CMK-1(wt)	none	30	20	0.735902
CMK-1(wt)	none	30	20	0.741089
CMK-1(wt)	none	30	20	0.762564
CMK-1(wt)	none	30	20	0.764791
CMK-1(wt)	none	30	20	0.771279
CMK-1(wt)	none	30	20	0.780257
CMK-1(wt)	none	30	20	0.791321
CMK-1(wt)	none	30	20	0.80634
CMK-1(wt)	none	30	20	0.829264
CMK-1(wt)	none	30	20	0.833915
CMK-1(wt)	none	30	20	0.850434
CMK-1(wt)	none	30	20	0.85198
CMK-1(wt)	none	30	20	0.864744
CMK-1(wt)	none	30	20	0.867668
CMK-1(wt)	none	30	20	0.882762
CMK-1(wt)	none	30	20	0.888713
CMK-1(wt)	none	30	20	0.906151
CMK-1(wt)	none	30	20	0.932175
CMK-1(wt)	none	30	20	0.935688
CMK-1(wt)	none	30	20	0.958822
CMK-1(wt)	none	30	20	0.970074
CMK-1(wt)	none	30	20	1.0402
CMK-1(wt)	none	30	28	0.396381
CMK-1(wt)	none	30	28	0.408152
CMK-1(wt)	none	30	28	0.481081
CMK-1(wt)	none	30	28	0.486749
CMK-1(wt)	none	30	28	0.48994
CMK-1(wt)	none	30	28	0.513094
CMK-1(wt)	none	30	28	0.544397
CMK-1(wt)	none	30	28	0.562182
CMK-1(wt)	none	30	28	0.576469
CMK-1(wt)	none	30	28	0.603623
CMK-1(wt)	none	30	28	0.619029
CMK-1(wt)	none	30	28	0.62016
CMK-1(wt)	none	30	28	0.629304
CMK-1(wt)	none	30	28	0.638745
CMK-1(wt)	none	30	28	0.668355
CMK-1(wt)	none	30	28	0.67547
CMK-1(wt)	none	30	28	0.686689
CMK-1(wt)	none	30	28	0.686765
CMK-1(wt)	none	30	28	0.689994
CMK-1(wt)	none	30	28	0.69182
CMK-1(wt)	none	30	28	0.696825
CMK-1(wt)	none	30	28	0.720359
CMK-1(wt)	none	30	28	0.722574
CMK-1(wt)	none	30	28	0.728635
CMK-1(wt)	none	30	28	0.729947
CMK-1(wt)	none	30	28	0.751446
CMK-1(wt)	none	30	28	0.760391
CMK-1(wt)	none	30	28	0.763861
CMK-1(wt)	none	30	28	0.773151
CMK-1(wt)	none	30	28	0.795055
CMK-1(wt)	none	30	28	0.798644
CMK-1(wt)	none	30	28	0.79973
CMK-1(wt)	none	30	28	0.80486
CMK-1(wt)	none	30	28	0.805662
CMK-1(wt)	none	30	28	0.807131
CMK-1(wt)	none	30	28	0.81328
CMK-1(wt)	none	30	28	0.816416
CMK-1(wt)	none	30	28	0.831452
CMK-1(wt)	none	30	28	0.837184
CMK-1(wt)	none	30	28	0.840248
CMK-1(wt)	none	30	28	0.856967
CMK-1(wt)	none	30	28	0.879019
CMK-1(wt)	none	30	28	0.902083
CMK-1(wt)	none	30	28	0.924856
CMK-1(wt)	none	30	28	0.931495
CMK-1(wt)	none	30	28	0.966613
CMK-1(wt)	none	30	28	0.97167
CMK-1(wt)	none	30	28	0.974807
CMK-1(wt)	none	30	28	1.00891
CMK-1(wt)	none	30	28	1.05763
CMK-1(wt)	none	30	28	1.06602
CMK-1(wt)	none	30	28	1.09307
CMK-1(wt)	none	30	28	1.18896
CMK-1(wt)	none	30	28	1.22036
CMK-1(wt)	none	45	20	0.374179
CMK-1(wt)	none	45	20	0.385627
CMK-1(wt)	none	45	20	0.477794
CMK-1(wt)	none	45	20	0.47961
CMK-1(wt)	none	45	20	0.480371
CMK-1(wt)	none	45	20	0.508473
CMK-1(wt)	none	45	20	0.520561
CMK-1(wt)	none	45	20	0.533456
CMK-1(wt)	none	45	20	0.553978
CMK-1(wt)	none	45	20	0.562874
CMK-1(wt)	none	45	20	0.591008
CMK-1(wt)	none	45	20	0.603644
CMK-1(wt)	none	45	20	0.605119
CMK-1(wt)	none	45	20	0.629605
CMK-1(wt)	none	45	20	0.646129
CMK-1(wt)	none	45	20	0.646231
CMK-1(wt)	none	45	20	0.652305
CMK-1(wt)	none	45	20	0.684209
CMK-1(wt)	none	45	20	0.69933
CMK-1(wt)	none	45	20	0.704816
CMK-1(wt)	none	45	20	0.708494
CMK-1(wt)	none	45	20	0.72299
CMK-1(wt)	none	45	20	0.740402
CMK-1(wt)	none	45	20	0.754088
CMK-1(wt)	none	45	20	0.759142
CMK-1(wt)	none	45	20	0.763121
CMK-1(wt)	none	45	20	0.76591
CMK-1(wt)	none	45	20	0.775061
CMK-1(wt)	none	45	20	0.778769
CMK-1(wt)	none	45	20	0.789702
CMK-1(wt)	none	45	20	0.797349
CMK-1(wt)	none	45	20	0.800376
CMK-1(wt)	none	45	20	0.811864
CMK-1(wt)	none	45	20	0.834779
CMK-1(wt)	none	45	20	0.85313
CMK-1(wt)	none	45	20	0.880041
CMK-1(wt)	none	45	20	0.887211
CMK-1(wt)	none	45	20	0.919122
CMK-1(wt)	none	45	20	1.16487
CMK-1(wt)	none	45	20	1.29272
CMK-1(wt)	none	45	20	1.32712
CMK-1(wt)	none	45	20	1.35873
CMK-1(wt)	none	45	20	1.38544
CMK-1(wt)	none	45	28	0.480034
CMK-1(wt)	none	45	28	0.529864
CMK-1(wt)	none	45	28	0.550393
CMK-1(wt)	none	45	28	0.571129
CMK-1(wt)	none	45	28	0.594264
CMK-1(wt)	none	45	28	0.617116
CMK-1(wt)	none	45	28	0.629792
CMK-1(wt)	none	45	28	0.634775
CMK-1(wt)	none	45	28	0.642459
CMK-1(wt)	none	45	28	0.678534
CMK-1(wt)	none	45	28	0.682634
CMK-1(wt)	none	45	28	0.683144
CMK-1(wt)	none	45	28	0.698007
CMK-1(wt)	none	45	28	0.700635
CMK-1(wt)	none	45	28	0.718623
CMK-1(wt)	none	45	28	0.720127
CMK-1(wt)	none	45	28	0.728762
CMK-1(wt)	none	45	28	0.72909
CMK-1(wt)	none	45	28	0.732749
CMK-1(wt)	none	45	28	0.738897
CMK-1(wt)	none	45	28	0.762152
CMK-1(wt)	none	45	28	0.768656
CMK-1(wt)	none	45	28	0.771165
CMK-1(wt)	none	45	28	0.777021
CMK-1(wt)	none	45	28	0.786495
CMK-1(wt)	none	45	28	0.810419
CMK-1(wt)	none	45	28	0.833698
CMK-1(wt)	none	45	28	0.844887
CMK-1(wt)	none	45	28	0.854143
CMK-1(wt)	none	45	28	0.857143
CMK-1(wt)	none	45	28	0.863295
CMK-1(wt)	none	45	28	0.884958
CMK-1(wt)	none	45	28	0.885345
CMK-1(wt)	none	45	28	0.897294
CMK-1(wt)	none	45	28	0.908097
CMK-1(wt)	none	45	28	0.916266
CMK-1(wt)	none	45	28	0.921463
CMK-1(wt)	none	45	28	0.931027
CMK-1(wt)	none	45	28	0.945525
CMK-1(wt)	none	45	28	0.957725
CMK-1(wt)	none	45	28	0.958344
CMK-1(wt)	none	45	28	0.96297
CMK-1(wt)	none	45	28	0.991547
CMK-1(wt)	none	45	28	1.00276
CMK-1(wt)	none	45	28	1.00878
CMK-1(wt)	none	45	28	1.01892
CMK-1(wt)	none	45	28	1.03454
CMK-1(wt)	none	45	28	1.03866
CMK-1(wt)	none	45	28	1.04503
CMK-1(wt)	none	45	28	1.05168
CMK-1(wt)	none	45	28	1.06786
CMK-1(wt)	none	45	28	1.08444
CMK-1(wt)	none	45	28	1.09548
CMK-1(wt)	none	45	28	1.17392
CMK-1(wt)	none	45	28	1.18283
CMK-1(wt)	none	45	28	1.21483
CMK-1(wt)	none	45	28	1.28593
CMK-1(wt)	none	45	28	1.30159
CMK-1(wt)	none	45	28	2.21867
CMK-1(wt)	none	60	20	0.0424486
CMK-1(wt)	none	60	20	0.297794
CMK-1(wt)	none	60	20	0.332477
CMK-1(wt)	none	60	20	0.383419
CMK-1(wt)	none	60	20	0.420397
CMK-1(wt)	none	60	20	0.482571
CMK-1(wt)	none	60	20	0.498416
CMK-1(wt)	none	60	20	0.514854
CMK-1(wt)	none	60	20	0.574874
CMK-1(wt)	none	60	20	0.600277
CMK-1(wt)	none	60	20	0.601631
CMK-1(wt)	none	60	20	0.616471
CMK-1(wt)	none	60	20	0.620763
CMK-1(wt)	none	60	20	0.640603
CMK-1(wt)	none	60	20	0.643065
CMK-1(wt)	none	60	20	0.65121
CMK-1(wt)	none	60	20	0.664866
CMK-1(wt)	none	60	20	0.674521
CMK-1(wt)	none	60	20	0.678783
CMK-1(wt)	none	60	20	0.68493
CMK-1(wt)	none	60	20	0.717561
CMK-1(wt)	none	60	20	0.723706
CMK-1(wt)	none	60	20	0.73333
CMK-1(wt)	none	60	20	0.758838
CMK-1(wt)	none	60	20	0.76954
CMK-1(wt)	none	60	20	0.790721
CMK-1(wt)	none	60	20	0.811415
CMK-1(wt)	none	60	20	0.814495
CMK-1(wt)	none	60	20	0.86791
CMK-1(wt)	none	60	20	0.872981
CMK-1(wt)	none	60	20	0.874067
CMK-1(wt)	none	60	20	0.876993
CMK-1(wt)	none	60	20	0.877146
CMK-1(wt)	none	60	20	0.881615
CMK-1(wt)	none	60	20	0.898459
CMK-1(wt)	none	60	20	0.901333
CMK-1(wt)	none	60	20	0.929872
CMK-1(wt)	none	60	20	0.930002
CMK-1(wt)	none	60	20	0.961964
CMK-1(wt)	none	60	20	0.966711
CMK-1(wt)	none	60	20	0.9703
CMK-1(wt)	none	60	20	0.970772
CMK-1(wt)	none	60	20	0.973819
CMK-1(wt)	none	60	20	0.983503
CMK-1(wt)	none	60	20	1.16901
CMK-1(wt)	none	60	20	1.19898
CMK-1(wt)	none	60	20	1.77677
CMK-1(wt)	none	60	28	0.564367
CMK-1(wt)	none	60	28	0.575909
CMK-1(wt)	none	60	28	0.582218
CMK-1(wt)	none	60	28	0.591217
CMK-1(wt)	none	60	28	0.597579
CMK-1(wt)	none	60	28	0.602051
CMK-1(wt)	none	60	28	0.606987
CMK-1(wt)	none	60	28	0.635799
CMK-1(wt)	none	60	28	0.643118
CMK-1(wt)	none	60	28	0.645322
CMK-1(wt)	none	60	28	0.666995
CMK-1(wt)	none	60	28	0.694149
CMK-1(wt)	none	60	28	0.697794
CMK-1(wt)	none	60	28	0.717194
CMK-1(wt)	none	60	28	0.733495
CMK-1(wt)	none	60	28	0.739266
CMK-1(wt)	none	60	28	0.741546
CMK-1(wt)	none	60	28	0.745386
CMK-1(wt)	none	60	28	0.761725
CMK-1(wt)	none	60	28	0.789001
CMK-1(wt)	none	60	28	0.831405
CMK-1(wt)	none	60	28	0.845952
CMK-1(wt)	none	60	28	0.853138
CMK-1(wt)	none	60	28	0.856561
CMK-1(wt)	none	60	28	0.863203
CMK-1(wt)	none	60	28	0.877409
CMK-1(wt)	none	60	28	0.878754
CMK-1(wt)	none	60	28	0.894965
CMK-1(wt)	none	60	28	0.905804
CMK-1(wt)	none	60	28	0.91387
CMK-1(wt)	none	60	28	0.954149
CMK-1(wt)	none	60	28	0.955226
CMK-1(wt)	none	60	28	0.962989
CMK-1(wt)	none	60	28	0.965543
CMK-1(wt)	none	60	28	0.992142
CMK-1(wt)	none	60	28	1.00099
CMK-1(wt)	none	60	28	1.01092
CMK-1(wt)	none	60	28	1.02251
CMK-1(wt)	none	60	28	1.03151
CMK-1(wt)	none	60	28	1.05199
CMK-1(wt)	none	60	28	1.07319
CMK-1(wt)	none	60	28	1.1108
CMK-1(wt)	none	60	28	1.11506
CMK-1(wt)	none	60	28	1.13835
CMK-1(wt)	none	60	28	1.13899
CMK-1(wt)	none	60	28	1.1541
CMK-1(wt)	none	60	28	1.15509
CMK-1(wt)	none	60	28	1.16261
CMK-1(wt)	none	60	28	1.19929
CMK-1(wt)	none	60	28	1.20768
CMK-1(wt)	none	60	28	1.21422
CMK-1(wt)	none	60	28	1.23176
CMK-1(wt)	none	60	28	1.24702
CMK-1(wt)	none	60	28	1.24891
CMK-1(wt)	none	60	28	1.2534
CMK-1(wt)	none	60	28	1.30649
CMK-1(wt)	none	60	28	1.32051
CMK-1(wt)	none	60	28	1.34185
CMK-1(wt)	none	60	28	1.34957
CMK-1(wt)	none	60	28	1.35552
CMK-1(wt)	none	60	28	1.49298
CMK-1(wt)	none	60	28	1.5459
CMK-1(wt)	none	60	28	1.92999
CMK-1(wt)	none	75	20	0.550243
CMK-1(wt)	none	75	20	0.562164
CMK-1(wt)	none	75	20	0.563053
CMK-1(wt)	none	75	20	0.583793
CMK-1(wt)	none	75	20	0.586621
CMK-1(wt)	none	75	20	0.609816
CMK-1(wt)	none	75	20	0.611264
CMK-1(wt)	none	75	20	0.61677
CMK-1(wt)	none	75	20	0.638395
CMK-1(wt)	none	75	20	0.678166
CMK-1(wt)	none	75	20	0.683655
CMK-1(wt)	none	75	20	0.703269
CMK-1(wt)	none	75	20	0.706911
CMK-1(wt)	none	75	20	0.713554
CMK-1(wt)	none	75	20	0.721443
CMK-1(wt)	none	75	20	0.726972
CMK-1(wt)	none	75	20	0.741393
CMK-1(wt)	none	75	20	0.744001
CMK-1(wt)	none	75	20	0.765364
CMK-1(wt)	none	75	20	0.778485
CMK-1(wt)	none	75	20	0.813058
CMK-1(wt)	none	75	20	0.831682
CMK-1(wt)	none	75	20	0.87143
CMK-1(wt)	none	75	20	0.872825
CMK-1(wt)	none	75	20	0.877477
CMK-1(wt)	none	75	20	0.889174
CMK-1(wt)	none	75	20	0.941784
CMK-1(wt)	none	75	20	0.978648
CMK-1(wt)	none	75	20	0.983367
CMK-1(wt)	none	75	20	1.1086
CMK-1(wt)	none	75	28	0.518157
CMK-1(wt)	none	75	28	0.715731
CMK-1(wt)	none	75	28	0.723868
CMK-1(wt)	none	75	28	0.746746
CMK-1(wt)	none	75	28	0.750012
CMK-1(wt)	none	75	28	0.800586
CMK-1(wt)	none	75	28	0.844265
CMK-1(wt)	none	75	28	0.878893
CMK-1(wt)	none	75	28	0.890572
CMK-1(wt)	none	75	28	0.906706
CMK-1(wt)	none	75	28	0.924399
CMK-1(wt)	none	75	28	0.983548
CMK-1(wt)	none	75	28	0.99762
CMK-1(wt)	none	75	28	1
CMK-1(wt)	none	75	28	1.01422
CMK-1(wt)	none	75	28	1.01622
CMK-1(wt)	none	75	28	1.04214
CMK-1(wt)	none	75	28	1.06177
CMK-1(wt)	none	75	28	1.06425
CMK-1(wt)	none	75	28	1.07538
CMK-1(wt)	none	75	28	1.07559
CMK-1(wt)	none	75	28	1.10108
CMK-1(wt)	none	75	28	1.11371
CMK-1(wt)	none	75	28	1.1713
CMK-1(wt)	none	75	28	1.17221
CMK-1(wt)	none	75	28	1.17244
CMK-1(wt)	none	75	28	1.18037
CMK-1(wt)	none	75	28	1.25649
CMK-1(wt)	none	75	28	1.27574
CMK-1(wt)	none	75	28	1.30154
CMK-1(wt)	none	75	28	1.30909
CMK-1(wt)	none	75	28	1.52011
CMK-1(wt)	none	90	20	0.248711
CMK-1(wt)	none	90	20	0.399534
CMK-1(wt)	none	90	20	0.426199
CMK-1(wt)	none	90	20	0.627009
CMK-1(wt)	none	90	20	0.628984
CMK-1(wt)	none	90	20	0.652908
CMK-1(wt)	none	90	20	0.708973
CMK-1(wt)	none	90	20	0.709185
CMK-1(wt)	none	90	20	0.749993
CMK-1(wt)	none	90	20	0.772586
CMK-1(wt)	none	90	20	0.788139
CMK-1(wt)	none	90	20	0.806481
CMK-1(wt)	none	90	20	0.83146
CMK-1(wt)	none	90	20	0.862843
CMK-1(wt)	none	90	20	0.965964
CMK-1(wt)	none	90	20	1.00637
CMK-1(wt)	none	90	20	1.05201
CMK-1(wt)	none	90	20	1.05371
CMK-1(wt)	none	90	20	1.05409
CMK-1(wt)	none	90	20	1.28995
CMK-1(wt)	none	90	28	0.773556
CMK-1(wt)	none	90	28	0.82172
CMK-1(wt)	none	90	28	0.880866
CMK-1(wt)	none	90	28	0.901459
CMK-1(wt)	none	90	28	1.00468
CMK-1(wt)	none	90	28	1.03275
CMK-1(wt)	none	90	28	1.08225
CMK-1(wt)	none	90	28	1.10531
CMK-1(wt)	none	90	28	1.12352
CMK-1(wt)	none	90	28	1.12989
CMK-1(wt)	none	90	28	1.1707
CMK-1(wt)	none	90	28	1.17824
CMK-1(wt)	none	90	28	1.26679
CMK-1(wt)	none	90	28	1.26825
CMK-1(wt)	none	90	28	1.27777
CMK-1(wt)	none	90	28	1.35061
CMK-1(wt)	none	90	28	1.38897
CMK-1(wt)	none	120	20	0.8392
CMK-1(wt)	none	120	20	1.05175
CMK-1(wt)	none	120	20	1.21494
CMK-1(wt)	none	120	20	0.916292
CMK-1(wt)	none	120	20	0.792245
CMK-1(wt)	none	120	20	1.00426
CMK-1(wt)	none	120	20	0.838718
CMK-1(wt)	none	120	20	0.920465
CMK-1(wt)	none	120	20	0.757138
CMK-1(wt)	none	120	20	0.70132
CMK-1(wt)	none	120	20	1.12744
CMK-1(wt)	none	120	20	1.20399
CMK-1(wt)	none	120	20	2.05609
CMK-1(wt)	none	120	20	0.998098
CMK-1(wt)	none	120	20	0.552922
CMK-1(wt)	none	120	20	0.361178
CMK-1(wt)	none	120	20	0.916789
CMK-1(wt)	none	120	20	0.413798
CMK-1(wt)	none	120	20	0.442898
CMK-1(wt)	none	120	20	1.07254
CMK-1(wt)	none	120	20	0.681439
CMK-1(wt)	none	120	20	0.423677
CMK-1(wt)	none	120	20	0.564099
CMK-1(wt)	none	120	20	0.388982
CMK-1(wt)	none	120	20	0.831554
CMK-1(wt)	none	120	20	0.353878
CMK-1(wt)	none	120	20	0.513421
CMK-1(wt)	none	120	20	0.424132
CMK-1(wt)	none	120	20	0.682587
CMK-1(wt)	none	120	20	0.603787
CMK-1(wt)	none	120	28	1.22001
CMK-1(wt)	none	120	28	1.15578
CMK-1(wt)	none	120	28	0.943785
CMK-1(wt)	none	120	28	1.28977
CMK-1(wt)	none	120	28	1.24705
CMK-1(wt)	none	120	28	1.37719
CMK-1(wt)	none	120	28	1.19651
CMK-1(wt)	none	120	28	1.19224
CMK-1(wt)	none	120	28	1.05971
CMK-1(wt)	none	120	28	1.11687
CMK-1(wt)	none	120	28	1.4749
CMK-1(wt)	none	120	28	1.08033
CMK-1(wt)	none	120	28	1.34986
CMK-1(wt)	none	120	28	1.36346
CMK-1(wt)	none	120	28	1.00209
CMK-1(wt)	none	120	28	1.19589
CMK-1(wt)	none	120	28	0.954984
CMK-1(wt)	none	120	28	1.53031
CMK-1(wt)	none	120	28	1.13925
CMK-1(wt)	none	120	28	1.43649
CMK-1(wt)	none	120	28	1.542
CMK-1(wt)	none	120	28	1.21482
CMK-1(wt)	none	120	28	1.33977
CMK-1(wt)	none	120	28	1.10495
CMK-1(wt)	none	120	28	0.940312
CMK-1(wt)	none	120	28	1.24364
CMK-1(wt)	none	120	28	0.934585
CMK-1(wt)	none	120	28	1.02912
CMK-1(wt)	none	120	28	1.77499
CMK-1(wt)	none	120	28	0.891764
CMK-1(wt)	none	120	28	1.1792
CMK-1(wt)	none	120	28	1.15829
CMK-1(wt)	none	120	28	1.11493
CMK-1(wt)	none	120	28	1.15545
CMK-1(wt)	none	120	28	0.919892
CMK-1(wt)	none	120	28	1.08721
CMK-1(wt)	none	120	28	1.02393
CMK-1(wt)	none	120	28	1.31548
CMK-1(wt)	none	120	28	0.974273
CMK-1(wt)	none	120	28	0.997446
CMK-1(wt)	none	120	28	0.793591
CMK-1(wt)	none	120	28	1.37521
CMK-1(wt)	none	120	28	1.02981
CMK-1(wt)	none	120	28	1.15587
CMK-1(wt)	none	120	28	1.17887
CMK-1(wt)	none	120	28	1.16173
CMK-1(wt)	none	120	28	0.683412
CMK-1(wt)	none	120	28	0.68354
CMK-1(wt)	none	120	28	1.02471
CMK-1(wt)	none	120	28	1.10954
CMK-1(wt)	none	120	28	1.1454
CMK-1(wt)	none	120	28	0.868647
CMK-1(wt)	none	120	28	1.00956
CMK-1(wt)	none	120	28	1.263
CMK-1(wt)	none	120	28	1.36508
CMK-1(wt)	none	120	28	0.852325
CMK-1(wt)	none	120	28	1.35531
CMK-1(wt)	none	120	28	0.992889
CMK-1(wt)	none	120	28	1.27928
CMK-1(wt)	none	120	28	0.888796
CMK-1(wt)	none	120	28	1.20988
CMK-1(wt)	none	120	28	1.23124
CMK-1(wt)	none	120	28	1.09191
CMK-1(wt)	none	120	28	0.818574
Raw data NES mutants
CMK-1 transgene	Drug treatment	Time (min)	Temperature (°C)	Ratio
CMK-1(I315A)	none	90	20	0.918016
CMK-1(I315A)	none	90	20	0.945414
CMK-1(I315A)	none	90	20	0.873113
CMK-1(I315A)	none	90	20	0.934598
CMK-1(I315A)	none	90	20	0.883904
CMK-1(I315A)	none	90	20	0.586843
CMK-1(I315A)	none	90	20	0.921762
CMK-1(I315A)	none	90	20	0.993799
CMK-1(I315A)	none	90	20	0.582649
CMK-1(I315A)	none	90	20	0.849034
CMK-1(I315A)	none	90	20	0.840536
CMK-1(I315A)	none	90	20	0.618119
CMK-1(I315A)	none	90	20	0.570817
CMK-1(I315A)	none	90	20	0.5059
CMK-1(I315A)	none	90	20	0.648679
CMK-1(I315A)	none	90	20	0.864011
CMK-1(I315A)	none	90	20	0.755624
CMK-1(I315A)	none	90	20	0.988421
CMK-1(I315A)	none	90	20	0.633153
CMK-1(I315A)	none	90	20	0.530573
CMK-1(I315A)	none	90	20	0.773654
CMK-1(I315A)	none	90	20	0.753068
CMK-1(I315A)	none	90	20	0.74491
CMK-1(I315A)	none	90	20	0.559393
CMK-1(I315A)	none	90	20	0.406176
CMK-1(I315A)	none	90	20	0.701915
CMK-1(I315A)	none	90	20	0.919949
CMK-1(I315A)	none	90	20	0.698229
CMK-1(I315A)	none	90	20	0.595627
CMK-1(I315A)	none	90	20	0.69546
CMK-1(I315A)	none	90	20	0.283281
CMK-1(I315A)	none	90	20	0.823853
CMK-1(I315A)	none	90	20	0.696704
CMK-1(I315A)	none	90	20	0.614494
CMK-1(I315A)	none	90	20	0.628467
CMK-1(I315A)	none	90	20	0.785662
CMK-1(I315A)	none	90	20	0.560034
CMK-1(I315A)	none	90	20	0.643553
CMK-1(I315A)	none	90	20	0.85986
CMK-1(I315A)	none	90	20	0.834441
CMK-1(I315A)	none	90	20	0.673676
CMK-1(I315A)	none	90	20	0.661705
CMK-1(I315A)	none	90	20	0.638875
CMK-1(I315A)	none	90	20	1.00408
CMK-1(I315A)	none	90	20	0.581829
CMK-1(I315A)	none	90	20	0.971041
CMK-1(I315A)	none	90	20	0.805066
CMK-1(I315A)	none	90	20	0.743356
CMK-1(I315A)	none	90	20	0.937189
CMK-1(I315A)	none	90	20	0.550148
CMK-1(I315A)	none	90	20	0.485458
CMK-1(I315A)	none	90	20	1.02107
CMK-1(I315A)	none	90	20	0.359098
CMK-1(I315A)	none	90	20	0.991107
CMK-1(I315A)	none	90	20	1.18718
CMK-1(I315A)	none	90	20	0.807368
CMK-1(I315A)	none	90	20	0.705361
CMK-1(I315A)	none	90	20	0.796983
CMK-1(I315A)	none	90	20	0.684439
CMK-1(I315A)	none	90	20	0.70316
CMK-1(I315A)	none	90	20	0.626051
CMK-1(I315A)	none	90	20	0.590198
CMK-1(I315A)	none	90	20	0.778521
CMK-1(I315A)	none	90	20	0.974088
CMK-1(I315A)	none	90	20	0.962493
CMK-1(I315A)	none	90	20	0.516014
CMK-1(I315A)	none	90	20	0.747465
CMK-1(I315A)	none	90	20	0.588242
CMK-1(I315A)	none	90	20	0.541068
CMK-1(I315A)	none	90	20	0.502576
CMK-1(I315A)	none	90	20	0.812136
CMK-1(I315A)	none	90	20	0.72188
CMK-1(I315A)	none	90	20	0.648074
CMK-1(I315A)	none	90	20	0.650087
CMK-1(I315A)	none	90	20	0.890766
CMK-1(I315A)	none	90	20	0.727016
CMK-1(I315A)	none	90	20	0.677696
CMK-1(I315A)	none	90	20	0.58695
CMK-1(I315A)	none	90	20	0.615592
CMK-1(I315A)	none	90	20	0.523068
CMK-1(I315A)	none	90	20	0.649531
CMK-1(I315A)	none	90	20	0.444661
CMK-1(I315A)	none	90	20	0.428581
CMK-1(I315A)	none	90	20	0.693808
CMK-1(I315A)	none	90	20	0.5405
CMK-1(I315A)	none	90	20	0.517297
CMK-1(I315A)	none	90	20	0.567391
CMK-1(I315A)	none	90	20	0.614092
CMK-1(I315A)	none	90	20	0.317396
CMK-1(I315A)	none	90	20	0.560363
CMK-1(I315A)	none	90	20	0.62527
CMK-1(I315A)	none	90	20	0.800724
CMK-1(I315A)	none	90	20	1.1818
CMK-1(I315A)	none	90	20	0.979227
CMK-1(I315A)	none	90	20	0.749025
CMK-1(I315A)	none	90	20	0.716854
CMK-1(I315A)	none	90	20	0.780913
CMK-1(I315A)	none	90	20	0.88741
CMK-1(I315A)	none	90	20	0.75827
CMK-1(I315A)	none	90	20	0.894916
CMK-1(I315A)	none	90	20	0.903199
CMK-1(I315A)	none	90	20	0.764921
CMK-1(I315A)	none	90	20	0.819822
CMK-1(I315A)	none	90	20	0.90657
CMK-1(I315A)	none	90	20	0.984065
CMK-1(I315A)	none	90	20	0.864034
CMK-1(I315A)	none	90	20	0.658722
CMK-1(I315A)	none	90	20	0.455655
CMK-1(I315A)	none	90	20	0.655752
CMK-1(I315A)	none	90	20	0.631133
CMK-1(I315A)	none	90	20	0.756654
CMK-1(I315A)	none	90	20	0.641285
CMK-1(I315A)	none	90	20	0.538181
CMK-1(I315A)	none	90	20	0.855868
CMK-1(I315A)	none	90	20	0.908255
CMK-1(I315A)	none	90	20	0.468236
CMK-1(I315A)	none	90	20	0.657056
CMK-1(I315A)	none	90	20	0.916397
CMK-1(I315A)	none	90	20	0.390139
CMK-1(I315A)	none	90	20	0.703122
CMK-1(I315A)	none	90	20	0.599733
CMK-1(I315A)	none	90	20	0.665835
CMK-1(I315A)	none	90	20	1.02403
CMK-1(I315A)	none	90	20	1.43469
CMK-1(I315A)	none	90	20	0.331796
CMK-1(I315A)	none	90	20	0.938365
CMK-1(I315A)	none	90	20	1.01653
CMK-1(I315A)	none	90	20	0.917579
CMK-1(I315A)	none	90	20	0.635117
CMK-1(I315A)	none	90	20	0.399219
CMK-1(I315A)	none	90	20	0.726762
CMK-1(I315A)	none	90	20	0.118446
CMK-1(I315A)	none	90	20	0.277043
CMK-1(I315A)	none	90	20	0.155622
CMK-1(I315A)	none	90	20	0.499629
CMK-1(I315A)	none	90	20	0.527223
CMK-1(I315A)	none	90	20	0.767615
CMK-1(I315A)	none	90	20	0.9464
CMK-1(I315A)	none	90	20	0.724221
CMK-1(I315A)	none	90	20	0.83799
CMK-1(I315A)	none	90	20	0.549075
CMK-1(I315A)	none	90	20	0.943052
CMK-1(I315A)	none	90	20	0.863767
CMK-1(I315A)	none	90	20	0.911493
CMK-1(I315A)	none	90	20	0.657201
CMK-1(I315A)	none	90	20	0.382807
CMK-1(I315A)	none	90	20	0.602313
CMK-1(I315A)	none	90	20	0.96065
CMK-1(I315A)	none	90	20	0.47406
CMK-1(I315A)	none	90	20	0.564065
CMK-1(I315A)	none	90	20	0.990877
CMK-1(I315A)	none	90	20	0.792064
CMK-1(I315A)	none	90	20	0.346468
CMK-1(I315A)	none	90	20	0.400012
CMK-1(I315A)	none	90	20	0.652837
CMK-1(I315A)	none	90	20	0.663672
CMK-1(I315A)	none	90	20	0.509729
CMK-1(I315A)	none	90	20	0.73557
CMK-1(I315A)	none	90	20	0.558831
CMK-1(I315A)	none	90	20	0.872883
CMK-1(I315A)	none	90	20	0.54668
CMK-1(I315A)	none	90	20	1.35577
CMK-1(I315A)	none	90	20	0.576859
CMK-1(I315A)	none	90	20	0.913026
CMK-1(I315A)	none	90	20	0.714462
CMK-1(I315A)	none	90	20	0.51762
CMK-1(I315A)	none	90	20	0.787022
CMK-1(I315A)	none	90	20	0.99052
CMK-1(I315A)	none	90	20	0.784258
CMK-1(I315A)	none	90	20	0.728573
CMK-1(I315A)	none	90	20	0.412741
CMK-1(I315A)	none	90	20	0.935001
CMK-1(I315A)	none	90	20	0.5475
CMK-1(I315A)	none	90	20	0.608246
CMK-1(I315A)	none	90	20	1.17171
CMK-1(I315A)	none	90	20	0.500545
CMK-1(I315A)	none	90	20	0.61118
CMK-1(I315A)	none	90	20	0.802556
CMK-1(I315A)	none	90	20	0.627327
CMK-1(I315A)	none	90	20	0.713189
CMK-1(I315A)	none	90	20	0.644014
CMK-1(I315A)	none	90	20	0.439651
CMK-1(I315A)	none	90	20	0.68429
CMK-1(I315A)	none	90	20	0.696481
CMK-1(I315A)	none	90	20	0.655655
CMK-1(I315A)	none	90	20	0.941277
CMK-1(I315A)	none	90	20	0.762299
CMK-1(I315A)	none	90	20	0.544864
CMK-1(I315A)	none	90	20	0.459812
CMK-1(I315A)	none	90	20	0.723204
CMK-1(I315A)	none	90	20	0.653104
CMK-1(I315A)	none	90	20	0.738975
CMK-1(I315A)	none	90	20	1.05909
CMK-1(I315A)	none	90	20	0.934975
CMK-1(I315A)	none	90	20	0.62957
CMK-1(I315A)	none	90	20	1.04695
CMK-1(I315A)	none	90	20	0.574034
CMK-1(I315A)	none	90	20	0.664999
CMK-1(I315A)	none	90	20	0.575598
CMK-1(I315A)	none	90	20	0.736463
CMK-1(I315A)	none	90	20	0.644265
CMK-1(I315A)	none	90	20	0.805546
CMK-1(I315A)	none	90	20	0.605775
CMK-1(I315A)	none	90	20	0.626117
CMK-1(I315A)	none	90	20	0.981667
CMK-1(I315A)	none	90	20	0.541766
CMK-1(I315A)	none	90	20	0.743973
CMK-1(I315A)	none	90	20	0.626423
CMK-1(I315A)	none	90	20	0.281809
CMK-1(I315A)	none	90	20	0.553574
CMK-1(I315A)	none	90	20	0.655081
CMK-1(I315A)	none	90	20	0.775657
CMK-1(I315A)	none	90	20	0.911079
CMK-1(I315A)	none	90	20	0.349671
CMK-1(I315A)	none	90	20	0.883705
CMK-1(I315A)	none	90	20	0.703328
CMK-1(I315A)	none	90	20	0.668239
CMK-1(I315A)	none	90	20	0.526842
CMK-1(I315A)	none	90	20	0.623692
CMK-1(I315A)	none	90	20	0.524428
CMK-1(I315A)	none	90	20	0.692417
CMK-1(I315A)	none	90	20	0.740317
CMK-1(I315A)	none	90	20	0.687201
CMK-1(I315A)	none	90	20	0.894934
CMK-1(I315A)	none	90	20	0.733333
CMK-1(I315A)	none	90	20	0.827331
CMK-1(I315A)	none	90	20	0.846657
CMK-1(I315A)	none	90	28	0.777723
CMK-1(I315A)	none	90	28	0.554542
CMK-1(I315A)	none	90	28	0.557048
CMK-1(I315A)	none	90	28	0.797933
CMK-1(I315A)	none	90	28	1.17432
CMK-1(I315A)	none	90	28	0.713575
CMK-1(I315A)	none	90	28	0.626123
CMK-1(I315A)	none	90	28	0.801669
CMK-1(I315A)	none	90	28	0.487982
CMK-1(I315A)	none	90	28	0.663652
CMK-1(I315A)	none	90	28	0.869685
CMK-1(I315A)	none	90	28	0.681423
CMK-1(I315A)	none	90	28	0.919217
CMK-1(I315A)	none	90	28	0.418417
CMK-1(I315A)	none	90	28	0.623833
CMK-1(I315A)	none	90	28	0.530131
CMK-1(I315A)	none	90	28	0.829299
CMK-1(I315A)	none	90	28	0.37043
CMK-1(I315A)	none	90	28	0.750869
CMK-1(I315A)	none	90	28	0.769017
CMK-1(I315A)	none	90	28	0.84353
CMK-1(I315A)	none	90	28	0.582944
CMK-1(I315A)	none	90	28	0.734111
CMK-1(I315A)	none	90	28	0.717907
CMK-1(I315A)	none	90	28	0.673183
CMK-1(I315A)	none	90	28	0.727873
CMK-1(I315A)	none	90	28	0.850211
CMK-1(I315A)	none	90	28	0.737197
CMK-1(I315A)	none	90	28	1.30503
CMK-1(I315A)	none	90	28	0.461778
CMK-1(I315A)	none	90	28	0.946688
CMK-1(I315A)	none	90	28	1.00518
CMK-1(I315A)	none	90	28	0.789209
CMK-1(I315A)	none	90	28	0.748289
CMK-1(I315A)	none	90	28	0.749607
CMK-1(I315A)	none	90	28	0.851072
CMK-1(I315A)	none	90	28	0.677302
CMK-1(I315A)	none	90	28	0.724258
CMK-1(I315A)	none	90	28	0.647986
CMK-1(I315A)	none	90	28	0.577483
CMK-1(I315A)	none	90	28	0.794416
CMK-1(I315A)	none	90	28	0.993058
CMK-1(I315A)	none	90	28	0.763708
CMK-1(I315A)	none	90	28	0.912019
CMK-1(I315A)	none	90	28	0.727322
CMK-1(I315A)	none	90	28	0.855665
CMK-1(I315A)	none	90	28	0.630698
CMK-1(I315A)	none	90	28	0.703283
CMK-1(I315A)	none	90	28	0.940015
CMK-1(I315A)	none	90	28	0.584224
CMK-1(I315A)	none	90	28	0.693331
CMK-1(I315A)	none	90	28	0.701667
CMK-1(I315A)	none	90	28	0.736694
CMK-1(I315A)	none	90	28	0.644497
CMK-1(I315A)	none	90	28	0.91329
CMK-1(I315A)	none	90	28	1.27327
CMK-1(I315A)	none	90	28	0.662788
CMK-1(I315A)	none	90	28	0.805285
CMK-1(I315A)	none	90	28	0.409658
CMK-1(I315A)	none	90	28	0.573704
CMK-1(I315A)	none	90	28	0.735217
CMK-1(I315A)	none	90	28	0.759355
CMK-1(I315A)	none	90	28	0.97691
CMK-1(I315A)	none	90	28	0.912847
CMK-1(I315A)	none	90	28	1.30921
CMK-1(I315A)	none	90	28	0.609508
CMK-1(I315A)	none	90	28	0.719604
CMK-1(I315A)	none	90	28	0.823394
CMK-1(I315A)	none	90	28	1.09452
CMK-1(I315A)	none	90	28	1.45679
CMK-1(I315A)	none	90	28	0.623809
CMK-1(I315A)	none	90	28	1.04956
CMK-1(I315A)	none	90	28	0.602693
CMK-1(I315A)	none	90	28	0.860471
CMK-1(I315A)	none	90	28	0.878799
CMK-1(I315A)	none	90	28	0.791712
CMK-1(I315A)	none	90	28	1.00628
CMK-1(I315A)	none	90	28	1.16467
CMK-1(I315A)	none	90	28	1.13424
CMK-1(I315A)	none	90	28	0.86437
CMK-1(I315A)	none	90	28	0.555313
CMK-1(I315A)	none	90	28	0.731726
CMK-1(I315A)	none	90	28	1.07436
CMK-1(I315A)	none	90	28	0.905064
CMK-1(I315A)	none	90	28	1.25187
CMK-1(I315A)	none	90	28	0.810928
CMK-1(I315A)	none	90	28	1.54317
CMK-1(I315A)	none	90	28	0.66383
CMK-1(I315A)	none	90	28	0.747462
CMK-1(I315A)	none	90	28	0.652876
CMK-1(I315A)	none	90	28	1.02189
CMK-1(I315A)	none	90	28	0.605401
CMK-1(I315A)	none	90	28	0.533633
CMK-1(I315A)	none	90	28	1.04512
CMK-1(I315A)	none	90	28	0.446641
CMK-1(I315A)	none	90	28	0.567021
CMK-1(I315A)	none	90	28	0.621892
CMK-1(I315A)	none	90	28	0.697577
CMK-1(I315A)	none	90	28	0.716206
CMK-1(I315A)	none	90	28	0.826929
CMK-1(I315A)	none	90	28	0.65588
CMK-1(I315A)	none	90	28	1.08555
CMK-1(I315A)	none	90	28	0.709408
CMK-1(I315A)	none	90	28	0.51798
CMK-1(I315A)	none	90	28	0.680243
CMK-1(I315A)	none	90	28	0.795621
CMK-1(I315A)	none	90	28	0.605131
CMK-1(I315A)	none	90	28	0.942573
CMK-1(I315A)	none	90	28	0.58922
CMK-1(I315A)	none	90	28	0.765598
CMK-1(I315A)	none	90	28	0.495101
CMK-1(I315A)	none	90	28	0.55892
CMK-1(I315A)	none	90	28	0.619537
CMK-1(I315A)	none	90	28	0.898456
CMK-1(I315A)	none	90	28	0.935922
CMK-1(I315A)	none	90	28	0.97808
CMK-1(I315A)	none	90	28	0.719547
CMK-1(I315A)	none	90	28	0.652263
CMK-1(I315A)	none	90	28	0.725673
CMK-1(I315A)	none	90	28	0.751446
CMK-1(I315A)	none	90	28	0.77656
CMK-1(I315A)	none	90	28	0.498847
CMK-1(I315A)	none	90	28	0.60781
CMK-1(I315A)	none	90	28	0.789029
CMK-1(I315A)	none	90	28	0.668653
CMK-1(I315A)	none	90	28	0.77132
CMK-1(I315A)	none	90	28	0.59025
CMK-1(I315A)	none	90	28	0.570492
CMK-1(I315A)	none	90	28	0.762823
CMK-1(I315A)	none	90	28	0.769597
CMK-1(I315A)	none	90	28	0.693007
CMK-1(I315A)	none	90	28	1.27941
CMK-1(I315A)	none	90	28	0.934222
CMK-1(I315A)	none	90	28	1.34036
CMK-1(I315A)	none	90	28	0.693048
CMK-1(I315A)	none	90	28	0.668979
CMK-1(I315A)	none	90	28	1.32155
CMK-1(I315A)	none	90	28	1.11017
CMK-1(I315A)	none	90	28	0.597698
CMK-1(I315A)	none	90	28	0.695524
CMK-1(I315A)	none	90	28	0.594148
CMK-1(I315A)	none	90	28	1.00689
CMK-1(I315A)	none	90	28	0.967668
CMK-1(I315A)	none	90	28	1.15924
CMK-1(I315A)	none	90	28	0.815238
CMK-1(I315A)	none	90	28	0.59947
CMK-1(I315A)	none	90	28	1.01027
CMK-1(I315A)	none	90	28	1.63362
CMK-1(I315A)	none	90	28	0.921619
CMK-1(I315A)	none	90	28	1.06962
CMK-1(I315A)	none	90	28	0.981899
CMK-1(I315A)	none	90	28	1.03512
CMK-1(I315A)	none	90	28	0.829095
CMK-1(I315A)	none	90	28	0.708624
CMK-1(I315A)	none	90	28	0.794026
CMK-1(I315A)	none	90	28	0.813761
CMK-1(I315A)	none	90	28	0.995069
CMK-1(I315A)	none	90	28	0.879571
CMK-1(I315A)	none	90	28	0.713174
CMK-1(I315A)	none	90	28	0.734389
CMK-1(I315A)	none	90	28	0.659597
CMK-1(I315A)	none	90	28	0.942749
CMK-1(I315A)	none	90	28	0.919945
CMK-1(I315A)	none	90	28	0.568947
CMK-1(I315A)	none	90	28	0.883476
CMK-1(I315A)	none	90	28	0.853564
CMK-1(I315A)	none	90	28	1.00895
CMK-1(I315A)	none	90	28	0.705969
CMK-1(I315A)	none	90	28	0.745473
CMK-1(I315A)	none	90	28	0.728754
CMK-1(I315A)	none	90	28	0.938979
CMK-1(I315A)	none	90	28	0.779362
CMK-1(I315A)	none	90	28	0.483508
CMK-1(I315A)	none	90	28	0.665452
CMK-1(I315A)	none	90	28	0.922252
CMK-1(I315A)	none	90	28	0.983891
CMK-1(I315A)	none	90	28	0.928044
CMK-1(I315A)	none	90	28	0.787034
CMK-1(I315A)	none	90	28	0.749692
CMK-1(I315A)	none	90	28	0.892833
CMK-1(I315A)	none	90	28	0.618724
CMK-1(I315A)	none	90	28	0.769632
CMK-1(I315A)	none	90	28	0.636582
CMK-1(I315A)	none	90	28	1.13111
CMK-1(I315A)	none	90	28	0.995402
CMK-1(I315A)	none	90	28	0.617067
CMK-1(I315A)	none	90	28	0.979646
CMK-1(I315A)	none	90	28	0.83556
CMK-1(I315A)	none	90	28	0.69067
CMK-1(I315A)	none	90	28	0.833025
CMK-1(I315A)	none	90	28	0.944188
CMK-1(I315A)	none	90	28	0.609882
CMK-1(I315A)	none	90	28	0.583605
CMK-1(I315A)	none	90	28	0.61639
CMK-1(I315A)	none	90	28	0.617319
CMK-1(I315A)	none	90	28	0.877
CMK-1(I315A)	none	90	28	0.853784
CMK-1(I315A)	none	90	28	0.523965
CMK-1(I315A)	none	90	28	0.938885
CMK-1(I315A)	none	90	28	0.918878
CMK-1(I315A)	none	90	28	0.686938
CMK-1(I315A)	none	90	28	0.718686
CMK-1(I315A)	none	90	28	0.798862
CMK-1(I315A)	none	90	28	0.742092
CMK-1(I315A)	none	90	28	0.739671
CMK-1(I315A)	none	90	28	0.719639
CMK-1(I315A)	none	90	28	0.946314
CMK-1(I315A)	none	90	28	0.782709
CMK-1(I315A)	none	90	28	1.1014
CMK-1(I315A)	none	90	28	0.714152
CMK-1(I315A)	none	90	28	0.982909
CMK-1(I315A)	none	90	28	1.015
CMK-1(I315A)	none	90	28	0.953174
CMK-1(I315A)	none	90	28	0.661716
CMK-1(I315A)	none	90	28	0.769468
CMK-1(I315A)	none	90	28	0.714072
CMK-1(I315A)	none	90	28	0.793781
CMK-1(I315A)	none	90	28	0.961293
CMK-1(I315A)	none	90	28	0.795659
CMK-1(I315A)	none	90	28	0.777251
CMK-1(I315A/L321A/L323A)	none	90	20	0.916568
CMK-1(I315A/L321A/L323A)	none	90	20	0.504008
CMK-1(I315A/L321A/L323A)	none	90	20	0.48967
CMK-1(I315A/L321A/L323A)	none	90	20	0.611188
CMK-1(I315A/L321A/L323A)	none	90	20	0.694415
CMK-1(I315A/L321A/L323A)	none	90	20	0.921257
CMK-1(I315A/L321A/L323A)	none	90	20	0.581326
CMK-1(I315A/L321A/L323A)	none	90	20	0.716844
CMK-1(I315A/L321A/L323A)	none	90	20	0.867764
CMK-1(I315A/L321A/L323A)	none	90	20	0.656315
CMK-1(I315A/L321A/L323A)	none	90	20	0.411094
CMK-1(I315A/L321A/L323A)	none	90	20	0.51274
CMK-1(I315A/L321A/L323A)	none	90	20	0.761249
CMK-1(I315A/L321A/L323A)	none	90	20	0.637167
CMK-1(I315A/L321A/L323A)	none	90	20	1.00878
CMK-1(I315A/L321A/L323A)	none	90	20	0.802684
CMK-1(I315A/L321A/L323A)	none	90	20	0.71323
CMK-1(I315A/L321A/L323A)	none	90	20	1.04142
CMK-1(I315A/L321A/L323A)	none	90	20	0.962752
CMK-1(I315A/L321A/L323A)	none	90	20	0.699363
CMK-1(I315A/L321A/L323A)	none	90	20	0.990587
CMK-1(I315A/L321A/L323A)	none	90	20	0.682249
CMK-1(I315A/L321A/L323A)	none	90	20	0.854282
CMK-1(I315A/L321A/L323A)	none	90	20	0.6791
CMK-1(I315A/L321A/L323A)	none	90	20	0.890093
CMK-1(I315A/L321A/L323A)	none	90	20	1.01072
CMK-1(I315A/L321A/L323A)	none	90	20	0.888897
CMK-1(I315A/L321A/L323A)	none	90	20	1.10118
CMK-1(I315A/L321A/L323A)	none	90	20	0.816945
CMK-1(I315A/L321A/L323A)	none	90	20	0.795074
CMK-1(I315A/L321A/L323A)	none	90	20	0.764827
CMK-1(I315A/L321A/L323A)	none	90	20	1.07781
CMK-1(I315A/L321A/L323A)	none	90	20	0.772826
CMK-1(I315A/L321A/L323A)	none	90	20	0.268816
CMK-1(I315A/L321A/L323A)	none	90	20	1.43345
CMK-1(I315A/L321A/L323A)	none	90	20	0.423665
CMK-1(I315A/L321A/L323A)	none	90	20	0.555437
CMK-1(I315A/L321A/L323A)	none	90	20	0.747087
CMK-1(I315A/L321A/L323A)	none	90	20	0.559331
CMK-1(I315A/L321A/L323A)	none	90	20	0.626082
CMK-1(I315A/L321A/L323A)	none	90	20	0.573436
CMK-1(I315A/L321A/L323A)	none	90	20	0.7923
CMK-1(I315A/L321A/L323A)	none	90	20	0.813508
CMK-1(I315A/L321A/L323A)	none	90	20	0.992803
CMK-1(I315A/L321A/L323A)	none	90	20	0.720973
CMK-1(I315A/L321A/L323A)	none	90	20	0.656307
CMK-1(I315A/L321A/L323A)	none	90	20	0.749206
CMK-1(I315A/L321A/L323A)	none	90	20	0.773816
CMK-1(I315A/L321A/L323A)	none	90	20	0.939898
CMK-1(I315A/L321A/L323A)	none	90	20	0.597542
CMK-1(I315A/L321A/L323A)	none	90	20	0.5
CMK-1(I315A/L321A/L323A)	none	90	20	1.05234
CMK-1(I315A/L321A/L323A)	none	90	20	0.703263
CMK-1(I315A/L321A/L323A)	none	90	20	0.618175
CMK-1(I315A/L321A/L323A)	none	90	20	1.05445
CMK-1(I315A/L321A/L323A)	none	90	20	0.678443
CMK-1(I315A/L321A/L323A)	none	90	20	0.652234
CMK-1(I315A/L321A/L323A)	none	90	20	0.760475
CMK-1(I315A/L321A/L323A)	none	90	20	0.894042
CMK-1(I315A/L321A/L323A)	none	90	20	0.356216
CMK-1(I315A/L321A/L323A)	none	90	20	0.499211
CMK-1(I315A/L321A/L323A)	none	90	20	0.640505
CMK-1(I315A/L321A/L323A)	none	90	20	0.493103
CMK-1(I315A/L321A/L323A)	none	90	20	0.579792
CMK-1(I315A/L321A/L323A)	none	90	20	0.575517
CMK-1(I315A/L321A/L323A)	none	90	20	0.935679
CMK-1(I315A/L321A/L323A)	none	90	20	0.995839
CMK-1(I315A/L321A/L323A)	none	90	20	0.996466
CMK-1(I315A/L321A/L323A)	none	90	20	0.674766
CMK-1(I315A/L321A/L323A)	none	90	20	0.985253
CMK-1(I315A/L321A/L323A)	none	90	20	1.08703
CMK-1(I315A/L321A/L323A)	none	90	20	0.923984
CMK-1(I315A/L321A/L323A)	none	90	20	0.784432
CMK-1(I315A/L321A/L323A)	none	90	20	0.672784
CMK-1(I315A/L321A/L323A)	none	90	20	0.660082
CMK-1(I315A/L321A/L323A)	none	90	20	0.377681
CMK-1(I315A/L321A/L323A)	none	90	20	0.534332
CMK-1(I315A/L321A/L323A)	none	90	20	0.611891
CMK-1(I315A/L321A/L323A)	none	90	20	0.785539
CMK-1(I315A/L321A/L323A)	none	90	20	1.01472
CMK-1(I315A/L321A/L323A)	none	90	20	0.692977
CMK-1(I315A/L321A/L323A)	none	90	20	0.559103
CMK-1(I315A/L321A/L323A)	none	90	20	0.904138
CMK-1(I315A/L321A/L323A)	none	90	20	0.953817
CMK-1(I315A/L321A/L323A)	none	90	20	0.995178
CMK-1(I315A/L321A/L323A)	none	90	20	0.643496
CMK-1(I315A/L321A/L323A)	none	90	20	0.989444
CMK-1(I315A/L321A/L323A)	none	90	20	0.781354
CMK-1(I315A/L321A/L323A)	none	90	20	0.666679
CMK-1(I315A/L321A/L323A)	none	90	20	0.947812
CMK-1(I315A/L321A/L323A)	none	90	20	0.552042
CMK-1(I315A/L321A/L323A)	none	90	20	0.647477
CMK-1(I315A/L321A/L323A)	none	90	20	0.545999
CMK-1(I315A/L321A/L323A)	none	90	20	0.852425
CMK-1(I315A/L321A/L323A)	none	90	20	0.544377
CMK-1(I315A/L321A/L323A)	none	90	20	0.727173
CMK-1(I315A/L321A/L323A)	none	90	20	0.984746
CMK-1(I315A/L321A/L323A)	none	90	20	0.594669
CMK-1(I315A/L321A/L323A)	none	90	20	0.646099
CMK-1(I315A/L321A/L323A)	none	90	20	0.662745
CMK-1(I315A/L321A/L323A)	none	90	20	0.876276
CMK-1(I315A/L321A/L323A)	none	90	20	0.859665
CMK-1(I315A/L321A/L323A)	none	90	20	0.535144
CMK-1(I315A/L321A/L323A)	none	90	20	1.34767
CMK-1(I315A/L321A/L323A)	none	90	20	0.801351
CMK-1(I315A/L321A/L323A)	none	90	20	1.07472
CMK-1(I315A/L321A/L323A)	none	90	20	1.00065
CMK-1(I315A/L321A/L323A)	none	90	20	0.78841
CMK-1(I315A/L321A/L323A)	none	90	20	0.31801
CMK-1(I315A/L321A/L323A)	none	90	20	1.07992
CMK-1(I315A/L321A/L323A)	none	90	20	0.557117
CMK-1(I315A/L321A/L323A)	none	90	20	0.661158
CMK-1(I315A/L321A/L323A)	none	90	20	0.553331
CMK-1(I315A/L321A/L323A)	none	90	20	0.926963
CMK-1(I315A/L321A/L323A)	none	90	20	0.54034
CMK-1(I315A/L321A/L323A)	none	90	20	0.634302
CMK-1(I315A/L321A/L323A)	none	90	20	0.649563
CMK-1(I315A/L321A/L323A)	none	90	20	0.893243
CMK-1(I315A/L321A/L323A)	none	90	20	0.881789
CMK-1(I315A/L321A/L323A)	none	90	20	0.310308
CMK-1(I315A/L321A/L323A)	none	90	20	0.319137
CMK-1(I315A/L321A/L323A)	none	90	20	0.680102
CMK-1(I315A/L321A/L323A)	none	90	20	0.545755
CMK-1(I315A/L321A/L323A)	none	90	20	0.80778
CMK-1(I315A/L321A/L323A)	none	90	20	0.70828
CMK-1(I315A/L321A/L323A)	none	90	20	0.855269
CMK-1(I315A/L321A/L323A)	none	90	20	0.878865
CMK-1(I315A/L321A/L323A)	none	90	20	0.948874
CMK-1(I315A/L321A/L323A)	none	90	20	0.947826
CMK-1(I315A/L321A/L323A)	none	90	20	0.45819
CMK-1(I315A/L321A/L323A)	none	90	20	1.0989
CMK-1(I315A/L321A/L323A)	none	90	20	0.993678
CMK-1(I315A/L321A/L323A)	none	90	20	0.728476
CMK-1(I315A/L321A/L323A)	none	90	20	0.586606
CMK-1(I315A/L321A/L323A)	none	90	20	0.885367
CMK-1(I315A/L321A/L323A)	none	90	20	0.506754
CMK-1(I315A/L321A/L323A)	none	90	20	0.708067
CMK-1(I315A/L321A/L323A)	none	90	20	0.581413
CMK-1(I315A/L321A/L323A)	none	90	20	1.13468
CMK-1(I315A/L321A/L323A)	none	90	20	0.965397
CMK-1(I315A/L321A/L323A)	none	90	20	0.270742
CMK-1(I315A/L321A/L323A)	none	90	20	0.81045
CMK-1(I315A/L321A/L323A)	none	90	20	1.20969
CMK-1(I315A/L321A/L323A)	none	90	20	0.612195
CMK-1(I315A/L321A/L323A)	none	90	20	0.632397
CMK-1(I315A/L321A/L323A)	none	90	20	0.815134
CMK-1(I315A/L321A/L323A)	none	90	20	0.629796
CMK-1(I315A/L321A/L323A)	none	90	20	0.972508
CMK-1(I315A/L321A/L323A)	none	90	20	0.716739
CMK-1(I315A/L321A/L323A)	none	90	20	0.580506
CMK-1(I315A/L321A/L323A)	none	90	20	0.579701
CMK-1(I315A/L321A/L323A)	none	90	20	0.638066
CMK-1(I315A/L321A/L323A)	none	90	20	1.14606
CMK-1(I315A/L321A/L323A)	none	90	20	0.858142
CMK-1(I315A/L321A/L323A)	none	90	20	0.557965
CMK-1(I315A/L321A/L323A)	none	90	20	0.955185
CMK-1(I315A/L321A/L323A)	none	90	20	0.46213
CMK-1(I315A/L321A/L323A)	none	90	20	0.73036
CMK-1(I315A/L321A/L323A)	none	90	20	0.624609
CMK-1(I315A/L321A/L323A)	none	90	20	0.858996
CMK-1(I315A/L321A/L323A)	none	90	20	0.735418
CMK-1(I315A/L321A/L323A)	none	90	20	0.63175
CMK-1(I315A/L321A/L323A)	none	90	20	0.724671
CMK-1(I315A/L321A/L323A)	none	90	20	0.767414
CMK-1(I315A/L321A/L323A)	none	90	20	0.574746
CMK-1(I315A/L321A/L323A)	none	90	20	0.761221
CMK-1(I315A/L321A/L323A)	none	90	20	0.698575
CMK-1(I315A/L321A/L323A)	none	90	20	1.04771
CMK-1(I315A/L321A/L323A)	none	90	20	1.00215
CMK-1(I315A/L321A/L323A)	none	90	20	0.627906
CMK-1(I315A/L321A/L323A)	none	90	20	0.68297
CMK-1(I315A/L321A/L323A)	none	90	20	0.493737
CMK-1(I315A/L321A/L323A)	none	90	20	0.934668
CMK-1(I315A/L321A/L323A)	none	90	20	0.741609
CMK-1(I315A/L321A/L323A)	none	90	20	0.763496
CMK-1(I315A/L321A/L323A)	none	90	20	0.534743
CMK-1(I315A/L321A/L323A)	none	90	20	0.632894
CMK-1(I315A/L321A/L323A)	none	90	20	0.58147
CMK-1(I315A/L321A/L323A)	none	90	20	0.808743
CMK-1(I315A/L321A/L323A)	none	90	20	0.882087
CMK-1(I315A/L321A/L323A)	none	90	20	1.24884
CMK-1(I315A/L321A/L323A)	none	90	20	0.655016
CMK-1(I315A/L321A/L323A)	none	90	20	0.96439
CMK-1(I315A/L321A/L323A)	none	90	20	0.879447
CMK-1(I315A/L321A/L323A)	none	90	20	0.751397
CMK-1(I315A/L321A/L323A)	none	90	20	1.12011
CMK-1(I315A/L321A/L323A)	none	90	20	0.798952
CMK-1(I315A/L321A/L323A)	none	90	20	0.604449
CMK-1(I315A/L321A/L323A)	none	90	20	0.960022
CMK-1(I315A/L321A/L323A)	none	90	20	0.966949
CMK-1(I315A/L321A/L323A)	none	90	20	1.02044
CMK-1(I315A/L321A/L323A)	none	90	20	0.776518
CMK-1(I315A/L321A/L323A)	none	90	20	0.495037
CMK-1(I315A/L321A/L323A)	none	90	20	0.462129
CMK-1(I315A/L321A/L323A)	none	90	20	0.96577
CMK-1(I315A/L321A/L323A)	none	90	20	0.869104
CMK-1(I315A/L321A/L323A)	none	90	20	0.471349
CMK-1(I315A/L321A/L323A)	none	90	20	0.455458
CMK-1(I315A/L321A/L323A)	none	90	20	0.429831
CMK-1(I315A/L321A/L323A)	none	90	20	1.06396
CMK-1(I315A/L321A/L323A)	none	90	20	0.764457
CMK-1(I315A/L321A/L323A)	none	90	20	1.36367
CMK-1(I315A/L321A/L323A)	none	90	20	0.750923
CMK-1(I315A/L321A/L323A)	none	90	20	0.74097
CMK-1(I315A/L321A/L323A)	none	90	20	0.293812
CMK-1(I315A/L321A/L323A)	none	90	20	0.564808
CMK-1(I315A/L321A/L323A)	none	90	20	0.945879
CMK-1(I315A/L321A/L323A)	none	90	20	0.980968
CMK-1(I315A/L321A/L323A)	none	90	20	1.0405
CMK-1(I315A/L321A/L323A)	none	90	20	0.711732
CMK-1(I315A/L321A/L323A)	none	90	20	0.811455
CMK-1(I315A/L321A/L323A)	none	90	20	0.426647
CMK-1(I315A/L321A/L323A)	none	90	20	0.923479
CMK-1(I315A/L321A/L323A)	none	90	20	0.69875
CMK-1(I315A/L321A/L323A)	none	90	20	0.852427
CMK-1(I315A/L321A/L323A)	none	90	20	0.969468
CMK-1(I315A/L321A/L323A)	none	90	20	0.565107
CMK-1(I315A/L321A/L323A)	none	90	20	0.400499
CMK-1(I315A/L321A/L323A)	none	90	20	0.127053
CMK-1(I315A/L321A/L323A)	none	90	20	0.824935
CMK-1(I315A/L321A/L323A)	none	90	20	0.506953
CMK-1(I315A/L321A/L323A)	none	90	20	0.949755
CMK-1(I315A/L321A/L323A)	none	90	20	0.75
CMK-1(I315A/L321A/L323A)	none	90	20	1.01289
CMK-1(I315A/L321A/L323A)	none	90	20	0.645374
CMK-1(I315A/L321A/L323A)	none	90	20	1.05935
CMK-1(I315A/L321A/L323A)	none	90	20	0.794459
CMK-1(I315A/L321A/L323A)	none	90	20	0.338094
CMK-1(I315A/L321A/L323A)	none	90	20	1.01136
CMK-1(I315A/L321A/L323A)	none	90	20	0.952413
CMK-1(I315A/L321A/L323A)	none	90	20	1.05379
CMK-1(I315A/L321A/L323A)	none	90	20	0.749826
CMK-1(I315A/L321A/L323A)	none	90	20	1.02464
CMK-1(I315A/L321A/L323A)	none	90	20	0.646477
CMK-1(I315A/L321A/L323A)	none	90	20	1.05571
CMK-1(I315A/L321A/L323A)	none	90	20	0.253719
CMK-1(I315A/L321A/L323A)	none	90	20	0.7729
CMK-1(I315A/L321A/L323A)	none	90	20	0.479433
CMK-1(I315A/L321A/L323A)	none	90	20	0.529572
CMK-1(I315A/L321A/L323A)	none	90	20	0.729113
CMK-1(I315A/L321A/L323A)	none	90	20	0.932589
CMK-1(I315A/L321A/L323A)	none	90	20	0.835029
CMK-1(I315A/L321A/L323A)	none	90	20	0.424535
CMK-1(I315A/L321A/L323A)	none	90	28	1.08711
CMK-1(I315A/L321A/L323A)	none	90	28	0.955412
CMK-1(I315A/L321A/L323A)	none	90	28	0.743986
CMK-1(I315A/L321A/L323A)	none	90	28	0.718394
CMK-1(I315A/L321A/L323A)	none	90	28	0.742016
CMK-1(I315A/L321A/L323A)	none	90	28	0.740976
CMK-1(I315A/L321A/L323A)	none	90	28	1.12744
CMK-1(I315A/L321A/L323A)	none	90	28	0.773174
CMK-1(I315A/L321A/L323A)	none	90	28	0.960134
CMK-1(I315A/L321A/L323A)	none	90	28	0.853691
CMK-1(I315A/L321A/L323A)	none	90	28	0.442484
CMK-1(I315A/L321A/L323A)	none	90	28	0.722559
CMK-1(I315A/L321A/L323A)	none	90	28	0.902319
CMK-1(I315A/L321A/L323A)	none	90	28	0.387652
CMK-1(I315A/L321A/L323A)	none	90	28	0.983704
CMK-1(I315A/L321A/L323A)	none	90	28	0.715744
CMK-1(I315A/L321A/L323A)	none	90	28	0.792024
CMK-1(I315A/L321A/L323A)	none	90	28	0.697674
CMK-1(I315A/L321A/L323A)	none	90	28	0.752216
CMK-1(I315A/L321A/L323A)	none	90	28	0.666459
CMK-1(I315A/L321A/L323A)	none	90	28	0.966907
CMK-1(I315A/L321A/L323A)	none	90	28	0.736494
CMK-1(I315A/L321A/L323A)	none	90	28	0.645247
CMK-1(I315A/L321A/L323A)	none	90	28	1.08674
CMK-1(I315A/L321A/L323A)	none	90	28	0.608471
CMK-1(I315A/L321A/L323A)	none	90	28	0.721415
CMK-1(I315A/L321A/L323A)	none	90	28	0.62581
CMK-1(I315A/L321A/L323A)	none	90	28	0.599229
CMK-1(I315A/L321A/L323A)	none	90	28	0.776573
CMK-1(I315A/L321A/L323A)	none	90	28	0.862097
CMK-1(I315A/L321A/L323A)	none	90	28	1.00905
CMK-1(I315A/L321A/L323A)	none	90	28	0.948905
CMK-1(I315A/L321A/L323A)	none	90	28	0.747841
CMK-1(I315A/L321A/L323A)	none	90	28	0.970288
CMK-1(I315A/L321A/L323A)	none	90	28	0.589996
CMK-1(I315A/L321A/L323A)	none	90	28	0.989393
CMK-1(I315A/L321A/L323A)	none	90	28	0.806713
CMK-1(I315A/L321A/L323A)	none	90	28	0.969758
CMK-1(I315A/L321A/L323A)	none	90	28	0.513205
CMK-1(I315A/L321A/L323A)	none	90	28	0.711811
CMK-1(I315A/L321A/L323A)	none	90	28	1.16227
CMK-1(I315A/L321A/L323A)	none	90	28	1.06793
CMK-1(I315A/L321A/L323A)	none	90	28	0.977215
CMK-1(I315A/L321A/L323A)	none	90	28	0.93489
CMK-1(I315A/L321A/L323A)	none	90	28	0.716505
CMK-1(I315A/L321A/L323A)	none	90	28	0.957787
CMK-1(I315A/L321A/L323A)	none	90	28	0.784791
CMK-1(I315A/L321A/L323A)	none	90	28	0.973968
CMK-1(I315A/L321A/L323A)	none	90	28	0.97447
CMK-1(I315A/L321A/L323A)	none	90	28	0.717905
CMK-1(I315A/L321A/L323A)	none	90	28	0.989104
CMK-1(I315A/L321A/L323A)	none	90	28	0.824801
CMK-1(I315A/L321A/L323A)	none	90	28	0.539373
CMK-1(I315A/L321A/L323A)	none	90	28	0.952602
CMK-1(I315A/L321A/L323A)	none	90	28	0.808306
CMK-1(I315A/L321A/L323A)	none	90	28	1.17497
CMK-1(I315A/L321A/L323A)	none	90	28	0.967667
CMK-1(I315A/L321A/L323A)	none	90	28	0.451378
CMK-1(I315A/L321A/L323A)	none	90	28	0.363201
CMK-1(I315A/L321A/L323A)	none	90	28	1.0123
CMK-1(I315A/L321A/L323A)	none	90	28	0.413927
CMK-1(I315A/L321A/L323A)	none	90	28	0.909092
CMK-1(I315A/L321A/L323A)	none	90	28	1.14673
CMK-1(I315A/L321A/L323A)	none	90	28	0.767129
CMK-1(I315A/L321A/L323A)	none	90	28	0.351514
CMK-1(I315A/L321A/L323A)	none	90	28	0.686338
CMK-1(I315A/L321A/L323A)	none	90	28	0.891067
CMK-1(I315A/L321A/L323A)	none	90	28	0.97319
CMK-1(I315A/L321A/L323A)	none	90	28	0.862769
CMK-1(I315A/L321A/L323A)	none	90	28	0.59649
CMK-1(I315A/L321A/L323A)	none	90	28	0.744364
CMK-1(I315A/L321A/L323A)	none	90	28	0.792078
CMK-1(I315A/L321A/L323A)	none	90	28	0.885309
CMK-1(I315A/L321A/L323A)	none	90	28	0.60464
CMK-1(I315A/L321A/L323A)	none	90	28	0.891028
CMK-1(I315A/L321A/L323A)	none	90	28	0.968284
CMK-1(I315A/L321A/L323A)	none	90	28	0.581773
CMK-1(I315A/L321A/L323A)	none	90	28	0.576063
CMK-1(I315A/L321A/L323A)	none	90	28	0.593562
CMK-1(I315A/L321A/L323A)	none	90	28	0.692852
CMK-1(I315A/L321A/L323A)	none	90	28	0.570568
CMK-1(I315A/L321A/L323A)	none	90	28	1.08131
CMK-1(I315A/L321A/L323A)	none	90	28	0.701621
CMK-1(I315A/L321A/L323A)	none	90	28	0.386609
CMK-1(I315A/L321A/L323A)	none	90	28	0.974213
CMK-1(I315A/L321A/L323A)	none	90	28	0.753149
CMK-1(I315A/L321A/L323A)	none	90	28	0.945962
CMK-1(I315A/L321A/L323A)	none	90	28	0.985976
CMK-1(I315A/L321A/L323A)	none	90	28	0.514215
CMK-1(I315A/L321A/L323A)	none	90	28	0.298408
CMK-1(I315A/L321A/L323A)	none	90	28	0.757133
CMK-1(I315A/L321A/L323A)	none	90	28	0.781843
CMK-1(I315A/L321A/L323A)	none	90	28	0.854886
CMK-1(I315A/L321A/L323A)	none	90	28	0.985551
CMK-1(I315A/L321A/L323A)	none	90	28	0.870682
CMK-1(I315A/L321A/L323A)	none	90	28	0.904631
CMK-1(I315A/L321A/L323A)	none	90	28	0.649135
CMK-1(I315A/L321A/L323A)	none	90	28	0.708301
CMK-1(I315A/L321A/L323A)	none	90	28	0.933663
CMK-1(I315A/L321A/L323A)	none	90	28	0.805914
CMK-1(I315A/L321A/L323A)	none	90	28	0.640342
CMK-1(I315A/L321A/L323A)	none	90	28	0.487738
CMK-1(I315A/L321A/L323A)	none	90	28	0.63901
CMK-1(I315A/L321A/L323A)	none	90	28	0.717297
CMK-1(I315A/L321A/L323A)	none	90	28	0.859423
CMK-1(I315A/L321A/L323A)	none	90	28	0.472997
CMK-1(I315A/L321A/L323A)	none	90	28	0.842287
CMK-1(I315A/L321A/L323A)	none	90	28	0.577395
CMK-1(I315A/L321A/L323A)	none	90	28	0.721408
CMK-1(I315A/L321A/L323A)	none	90	28	0.600526
CMK-1(I315A/L321A/L323A)	none	90	28	0.939567
CMK-1(I315A/L321A/L323A)	none	90	28	0.726027
CMK-1(I315A/L321A/L323A)	none	90	28	1.07468
CMK-1(I315A/L321A/L323A)	none	90	28	0.97357
CMK-1(I315A/L321A/L323A)	none	90	28	1.06947
CMK-1(I315A/L321A/L323A)	none	90	28	0.670921
CMK-1(I315A/L321A/L323A)	none	90	28	0.692568
CMK-1(I315A/L321A/L323A)	none	90	28	0.476058
CMK-1(I315A/L321A/L323A)	none	90	28	1.07246
CMK-1(I315A/L321A/L323A)	none	90	28	0.924999
CMK-1(I315A/L321A/L323A)	none	90	28	0.660891
CMK-1(I315A/L321A/L323A)	none	90	28	0.636322
CMK-1(I315A/L321A/L323A)	none	90	28	0.535132
CMK-1(I315A/L321A/L323A)	none	90	28	0.725682
CMK-1(I315A/L321A/L323A)	none	90	28	0.79607
CMK-1(I315A/L321A/L323A)	none	90	28	0.49317
CMK-1(I315A/L321A/L323A)	none	90	28	0.990542
CMK-1(I315A/L321A/L323A)	none	90	28	0.7492
CMK-1(I315A/L321A/L323A)	none	90	28	1.07153
CMK-1(I315A/L321A/L323A)	none	90	28	0.579831
CMK-1(I315A/L321A/L323A)	none	90	28	1.01495
CMK-1(I315A/L321A/L323A)	none	90	28	0.955187
CMK-1(I315A/L321A/L323A)	none	90	28	0.950101
CMK-1(I315A/L321A/L323A)	none	90	28	0.645782
CMK-1(I315A/L321A/L323A)	none	90	28	0.787505
CMK-1(I315A/L321A/L323A)	none	90	28	0.822585
CMK-1(I315A/L321A/L323A)	none	90	28	0.890599
CMK-1(I315A/L321A/L323A)	none	90	28	0.992135
CMK-1(I315A/L321A/L323A)	none	90	28	0.715966
CMK-1(I315A/L321A/L323A)	none	90	28	0.720022
CMK-1(I315A/L321A/L323A)	none	90	28	0.59786
CMK-1(I315A/L321A/L323A)	none	90	28	0.831057
CMK-1(I315A/L321A/L323A)	none	90	28	0.938639
CMK-1(I315A/L321A/L323A)	none	90	28	1.00258
CMK-1(I315A/L321A/L323A)	none	90	28	0.725478
CMK-1(I315A/L321A/L323A)	none	90	28	0.787196
CMK-1(I315A/L321A/L323A)	none	90	28	1.18487
CMK-1(I315A/L321A/L323A)	none	90	28	0.918866
CMK-1(I315A/L321A/L323A)	none	90	28	0.685002
CMK-1(I315A/L321A/L323A)	none	90	28	0.569417
CMK-1(I315A/L321A/L323A)	none	90	28	0.947339
CMK-1(I315A/L321A/L323A)	none	90	28	0.979512
CMK-1(I315A/L321A/L323A)	none	90	28	0.481142
CMK-1(I315A/L321A/L323A)	none	90	28	0.725522
CMK-1(I315A/L321A/L323A)	none	90	28	0.952394
CMK-1(I315A/L321A/L323A)	none	90	28	0.868819
CMK-1(I315A/L321A/L323A)	none	90	28	0.941827
CMK-1(I315A/L321A/L323A)	none	90	28	0.813938
CMK-1(I315A/L321A/L323A)	none	90	28	0.786281
CMK-1(I315A/L321A/L323A)	none	90	28	0.640237
CMK-1(I315A/L321A/L323A)	none	90	28	1.00484
CMK-1(I315A/L321A/L323A)	none	90	28	0.749765
CMK-1(I315A/L321A/L323A)	none	90	28	0.152491
CMK-1(I315A/L321A/L323A)	none	90	28	0.674774
CMK-1(I315A/L321A/L323A)	none	90	28	0.937516
CMK-1(I315A/L321A/L323A)	none	90	28	0.960652
CMK-1(I315A/L321A/L323A)	none	90	28	0.522319
CMK-1(I315A/L321A/L323A)	none	90	28	0.911883
CMK-1(I315A/L321A/L323A)	none	90	28	0.555558
CMK-1(I315A/L321A/L323A)	none	90	28	0.58819
CMK-1(I315A/L321A/L323A)	none	90	28	0.472874
CMK-1(I315A/L321A/L323A)	none	90	28	0.944898
CMK-1(I315A/L321A/L323A)	none	90	28	0.700537
CMK-1(I315A/L321A/L323A)	none	90	28	1.04403
CMK-1(I315A/L321A/L323A)	none	90	28	0.633097
CMK-1(I315A/L321A/L323A)	none	90	28	0.964731
CMK-1(I315A/L321A/L323A)	none	90	28	0.902749
CMK-1(I315A/L321A/L323A)	none	90	28	0.723784
CMK-1(I315A/L321A/L323A)	none	90	28	0.879475
CMK-1(I315A/L321A/L323A)	none	90	28	0.721415
CMK-1(I315A/L321A/L323A)	none	90	28	0.65754
CMK-1(I315A/L321A/L323A)	none	90	28	0.93359
CMK-1(I315A/L321A/L323A)	none	90	28	0.720418
CMK-1(I315A/L321A/L323A)	none	90	28	0.543033
CMK-1(I315A/L321A/L323A)	none	90	28	0.809013
CMK-1(I315A/L321A/L323A)	none	90	28	0.760725
CMK-1(I315A/L321A/L323A)	none	90	28	0.452319
CMK-1(I315A/L321A/L323A)	none	90	28	0.39999
CMK-1(I315A/L321A/L323A)	none	90	28	0.986442
CMK-1(I315A/L321A/L323A)	none	90	28	0.638567
CMK-1(I315A/L321A/L323A)	none	90	28	1.01257
CMK-1(I315A/L321A/L323A)	none	90	28	0.697506
CMK-1(I315A/L321A/L323A)	none	90	28	0.94927
CMK-1(I315A/L321A/L323A)	none	90	28	0.981743
CMK-1(I315A/L321A/L323A)	none	90	28	0.676994
CMK-1(I315A/L321A/L323A)	none	90	28	1.00169
CMK-1(I315A/L321A/L323A)	none	90	28	0.892525
CMK-1(I315A/L321A/L323A)	none	90	28	0.656552
CMK-1(I315A/L321A/L323A)	none	90	28	0.914245
CMK-1(I315A/L321A/L323A)	none	90	28	1.10053
CMK-1(I315A/L321A/L323A)	none	90	28	1.12465
CMK-1(I315A/L321A/L323A)	none	90	28	1.09971
CMK-1(I315A/L321A/L323A)	none	90	28	1.10047
CMK-1(I315A/L321A/L323A)	none	90	28	0.894487
CMK-1(I315A/L321A/L323A)	none	90	28	0.908362
CMK-1(I315A/L321A/L323A)	none	90	28	0.783398
CMK-1(I315A/L321A/L323A)	none	90	28	1.21952
CMK-1(I315A/L321A/L323A)	none	90	28	1.05372
CMK-1(I315A/L321A/L323A)	none	90	28	1.10879
CMK-1(I315A/L321A/L323A)	none	90	28	0.655589
CMK-1(I315A/L321A/L323A)	none	90	28	0.946071
CMK-1(I315A/L321A/L323A)	none	90	28	0.977577
CMK-1(I315A/L321A/L323A)	none	90	28	0.7526
CMK-1(I315A/L321A/L323A)	none	90	28	1.04618
CMK-1(I315A/L321A/L323A)	none	90	28	0.994062
CMK-1(I315A/L321A/L323A)	none	90	28	1.01006
CMK-1(I315A/L321A/L323A)	none	90	28	0.863872
CMK-1(I315A/L321A/L323A)	none	90	28	0.886062
CMK-1(I315A/L321A/L323A)	none	90	28	0.755226
CMK-1(I315A/L321A/L323A)	none	90	28	1.10381
CMK-1(I315A/L321A/L323A)	none	90	28	0.69344
CMK-1(I315A/L321A/L323A)	none	90	28	1.01492
CMK-1(I315A/L321A/L323A)	none	90	28	1.01917
CMK-1(I315A/L321A/L323A)	none	90	28	0.85782
CMK-1(I315A/L321A/L323A)	none	90	28	0.894667
CMK-1(I315A/L321A/L323A)	none	90	28	0.776637
CMK-1(I315A/L321A/L323A)	none	90	28	0.766954
CMK-1(I315A/L321A/L323A)	none	90	28	1.00932
CMK-1(I315A/L321A/L323A)	none	90	28	0.917304
CMK-1(I315A/L321A/L323A)	none	90	28	1.01031
CMK-1(I315A/L321A/L323A)	none	90	28	0.85929
CMK-1(I315A/L321A/L323A)	none	90	28	0.517389
CMK-1(I315A/L321A/L323A)	none	90	28	0.448345
CMK-1(I315A/L321A/L323A)	none	90	28	0.575796
CMK-1(I315A/L321A/L323A)	none	90	28	0.864604
CMK-1(I315A/L321A/L323A)	none	90	28	0.593124
CMK-1(I315A/L321A/L323A)	none	90	28	0.374557
CMK-1(I315A/L321A/L323A)	none	90	28	0.904579
CMK-1(I315A/L321A/L323A)	none	90	28	1.00496
CMK-1(I315A/L321A/L323A)	none	90	28	0.27326
CMK-1(I315A/L321A/L323A)	none	90	28	0.392347
CMK-1(I315A/L321A/L323A)	none	90	28	0.60425
CMK-1(I315A/L321A/L323A)	none	90	28	0.505056
CMK-1(I315A/L321A/L323A)	none	90	28	0.338599
CMK-1(I315A/L321A/L323A)	none	90	28	0.395221
CMK-1(I315A/L321A/L323A)	none	90	28	0.708
CMK-1(I315A/L321A/L323A)	none	90	28	0.64046
CMK-1(I315A/L321A/L323A)	none	90	28	0.949503
CMK-1(I315A/L321A/L323A)	none	90	28	0.757187
CMK-1(I315A/L321A/L323A)	none	90	28	0.843674
CMK-1(wt)	none	90	20	0.473019
CMK-1(wt)	none	90	20	1.303
CMK-1(wt)	none	90	20	0.808263
CMK-1(wt)	none	90	20	0.594935
CMK-1(wt)	none	90	20	0.533113
CMK-1(wt)	none	90	20	0.661159
CMK-1(wt)	none	90	20	0.319222
CMK-1(wt)	none	90	20	1.26003
CMK-1(wt)	none	90	20	0.782069
CMK-1(wt)	none	90	20	0.87738
CMK-1(wt)	none	90	20	0.680648
CMK-1(wt)	none	90	20	0.744045
CMK-1(wt)	none	90	20	0.819726
CMK-1(wt)	none	90	20	0.864919
CMK-1(wt)	none	90	20	0.727276
CMK-1(wt)	none	90	20	0.720874
CMK-1(wt)	none	90	20	0.525943
CMK-1(wt)	none	90	20	1.05365
CMK-1(wt)	none	90	20	0.692145
CMK-1(wt)	none	90	20	0.757214
CMK-1(wt)	none	90	20	0.875013
CMK-1(wt)	none	90	20	0.786115
CMK-1(wt)	none	90	20	0.630896
CMK-1(wt)	none	90	20	0.67734
CMK-1(wt)	none	90	20	0.664836
CMK-1(wt)	none	90	20	0.741725
CMK-1(wt)	none	90	20	0.787346
CMK-1(wt)	none	90	20	0.656809
CMK-1(wt)	none	90	20	0.562018
CMK-1(wt)	none	90	20	0.481664
CMK-1(wt)	none	90	20	0.544429
CMK-1(wt)	none	90	20	0.937093
CMK-1(wt)	none	90	20	0.878839
CMK-1(wt)	none	90	20	0.38281
CMK-1(wt)	none	90	20	0.950385
CMK-1(wt)	none	90	20	0.620439
CMK-1(wt)	none	90	20	0.720794
CMK-1(wt)	none	90	20	0.720385
CMK-1(wt)	none	90	20	0.731717
CMK-1(wt)	none	90	20	0.665965
CMK-1(wt)	none	90	20	0.875846
CMK-1(wt)	none	90	20	0.645434
CMK-1(wt)	none	90	20	0.998427
CMK-1(wt)	none	90	20	0.851928
CMK-1(wt)	none	90	20	1.07834
CMK-1(wt)	none	90	20	0.483533
CMK-1(wt)	none	90	20	0.581299
CMK-1(wt)	none	90	20	0.748993
CMK-1(wt)	none	90	20	0.34962
CMK-1(wt)	none	90	20	0.645282
CMK-1(wt)	none	90	20	0.623701
CMK-1(wt)	none	90	20	0.476569
CMK-1(wt)	none	90	20	0.539175
CMK-1(wt)	none	90	20	0.822585
CMK-1(wt)	none	90	20	0.689603
CMK-1(wt)	none	90	20	1.09441
CMK-1(wt)	none	90	20	0.768915
CMK-1(wt)	none	90	20	0.942472
CMK-1(wt)	none	90	20	0.591433
CMK-1(wt)	none	90	20	0.85343
CMK-1(wt)	none	90	20	0.763793
CMK-1(wt)	none	90	20	0.666673
CMK-1(wt)	none	90	20	0.558317
CMK-1(wt)	none	90	20	0.86315
CMK-1(wt)	none	90	20	0.733202
CMK-1(wt)	none	90	20	0.835671
CMK-1(wt)	none	90	20	0.615459
CMK-1(wt)	none	90	20	0.746994
CMK-1(wt)	none	90	20	0.822351
CMK-1(wt)	none	90	20	1.05601
CMK-1(wt)	none	90	20	0.658896
CMK-1(wt)	none	90	20	0.806686
CMK-1(wt)	none	90	20	0.828098
CMK-1(wt)	none	90	20	0.771503
CMK-1(wt)	none	90	20	0.554106
CMK-1(wt)	none	90	20	0.756286
CMK-1(wt)	none	90	20	0.603907
CMK-1(wt)	none	90	20	0.698028
CMK-1(wt)	none	90	20	0.959033
CMK-1(wt)	none	90	20	0.64171
CMK-1(wt)	none	90	20	0.785428
CMK-1(wt)	none	90	20	0.823208
CMK-1(wt)	none	90	20	0.601195
CMK-1(wt)	none	90	20	0.97342
CMK-1(wt)	none	90	20	0.841575
CMK-1(wt)	none	90	20	0.653143
CMK-1(wt)	none	90	20	0.646663
CMK-1(wt)	none	90	20	0.635143
CMK-1(wt)	none	90	20	0.715889
CMK-1(wt)	none	90	20	0.980372
CMK-1(wt)	none	90	20	0.795259
CMK-1(wt)	none	90	20	0.643706
CMK-1(wt)	none	90	20	0.884988
CMK-1(wt)	none	90	20	0.985084
CMK-1(wt)	none	90	20	0.805114
CMK-1(wt)	none	90	20	0.718643
CMK-1(wt)	none	90	20	0.704781
CMK-1(wt)	none	90	20	0.752672
CMK-1(wt)	none	90	20	0.675876
CMK-1(wt)	none	90	20	0.903074
CMK-1(wt)	none	90	20	0.672586
CMK-1(wt)	none	90	20	0.712139
CMK-1(wt)	none	90	20	0.754655
CMK-1(wt)	none	90	20	0.637346
CMK-1(wt)	none	90	20	0.699331
CMK-1(wt)	none	90	20	0.571308
CMK-1(wt)	none	90	20	0.836636
CMK-1(wt)	none	90	20	0.510453
CMK-1(wt)	none	90	20	0.579166
CMK-1(wt)	none	90	20	0.747276
CMK-1(wt)	none	90	20	0.456193
CMK-1(wt)	none	90	20	0.515373
CMK-1(wt)	none	90	20	0.98725
CMK-1(wt)	none	90	20	0.524466
CMK-1(wt)	none	90	20	0.680795
CMK-1(wt)	none	90	20	0.997304
CMK-1(wt)	none	90	20	0.679328
CMK-1(wt)	none	90	20	0.857307
CMK-1(wt)	none	90	20	0.762139
CMK-1(wt)	none	90	20	0.741427
CMK-1(wt)	none	90	20	0.852884
CMK-1(wt)	none	90	20	0.8168
CMK-1(wt)	none	90	20	0.808301
CMK-1(wt)	none	90	20	1.00668
CMK-1(wt)	none	90	20	0.49776
CMK-1(wt)	none	90	20	0.947389
CMK-1(wt)	none	90	20	0.65263
CMK-1(wt)	none	90	20	0.766906
CMK-1(wt)	none	90	20	0.478065
CMK-1(wt)	none	90	20	0.771015
CMK-1(wt)	none	90	20	0.72869
CMK-1(wt)	none	90	20	0.644236
CMK-1(wt)	none	90	20	1.08832
CMK-1(wt)	none	90	20	0.68634
CMK-1(wt)	none	90	20	0.58851
CMK-1(wt)	none	90	20	0.800005
CMK-1(wt)	none	90	20	0.763277
CMK-1(wt)	none	90	20	0.842763
CMK-1(wt)	none	90	20	0.917042
CMK-1(wt)	none	90	20	0.648083
CMK-1(wt)	none	90	20	0.524442
CMK-1(wt)	none	90	20	0.844913
CMK-1(wt)	none	90	20	0.998754
CMK-1(wt)	none	90	20	0.750364
CMK-1(wt)	none	90	20	0.899168
CMK-1(wt)	none	90	20	0.792508
CMK-1(wt)	none	90	20	0.970185
CMK-1(wt)	none	90	20	0.883997
CMK-1(wt)	none	90	20	0.640227
CMK-1(wt)	none	90	20	0.706911
CMK-1(wt)	none	90	20	0.784725
CMK-1(wt)	none	90	20	0.667658
CMK-1(wt)	none	90	20	0.595531
CMK-1(wt)	none	90	20	0.769289
CMK-1(wt)	none	90	20	0.761312
CMK-1(wt)	none	90	20	0.820099
CMK-1(wt)	none	90	20	0.912982
CMK-1(wt)	none	90	20	1.05665
CMK-1(wt)	none	90	20	0.835884
CMK-1(wt)	none	90	20	1.03481
CMK-1(wt)	none	90	20	0.960305
CMK-1(wt)	none	90	20	0.633265
CMK-1(wt)	none	90	20	0.978584
CMK-1(wt)	none	90	20	0.438606
CMK-1(wt)	none	90	20	0.52793
CMK-1(wt)	none	90	20	0.683848
CMK-1(wt)	none	90	20	0.58684
CMK-1(wt)	none	90	20	1.27772
CMK-1(wt)	none	90	20	0.807259
CMK-1(wt)	none	90	20	0.601074
CMK-1(wt)	none	90	20	0.733526
CMK-1(wt)	none	90	20	0.530397
CMK-1(wt)	none	90	20	0.696634
CMK-1(wt)	none	90	20	0.604764
CMK-1(wt)	none	90	20	0.520781
CMK-1(wt)	none	90	20	0.584957
CMK-1(wt)	none	90	20	0.872191
CMK-1(wt)	none	90	20	0.623301
CMK-1(wt)	none	90	20	0.719633
CMK-1(wt)	none	90	20	0.729495
CMK-1(wt)	none	90	20	0.739198
CMK-1(wt)	none	90	20	0.695871
CMK-1(wt)	none	90	20	0.8643
CMK-1(wt)	none	90	28	1.19819
CMK-1(wt)	none	90	28	1.0443
CMK-1(wt)	none	90	28	1.01436
CMK-1(wt)	none	90	28	1.23024
CMK-1(wt)	none	90	28	0.753519
CMK-1(wt)	none	90	28	0.95083
CMK-1(wt)	none	90	28	1.3989
CMK-1(wt)	none	90	28	0.799991
CMK-1(wt)	none	90	28	0.78356
CMK-1(wt)	none	90	28	1.11882
CMK-1(wt)	none	90	28	1.07783
CMK-1(wt)	none	90	28	1.06896
CMK-1(wt)	none	90	28	1.13239
CMK-1(wt)	none	90	28	1.44189
CMK-1(wt)	none	90	28	1.06156
CMK-1(wt)	none	90	28	1.1834
CMK-1(wt)	none	90	28	0.783722
CMK-1(wt)	none	90	28	0.839066
CMK-1(wt)	none	90	28	1.16321
CMK-1(wt)	none	90	28	1.00323
CMK-1(wt)	none	90	28	2.4716
CMK-1(wt)	none	90	28	0.772079
CMK-1(wt)	none	90	28	1.1657
CMK-1(wt)	none	90	28	1.1712
CMK-1(wt)	none	90	28	0.959349
CMK-1(wt)	none	90	28	0.853785
CMK-1(wt)	none	90	28	1.23041
CMK-1(wt)	none	90	28	1.05824
CMK-1(wt)	none	90	28	0.839403
CMK-1(wt)	none	90	28	1.34239
CMK-1(wt)	none	90	28	1.12644
CMK-1(wt)	none	90	28	1.30574
CMK-1(wt)	none	90	28	0.618841
CMK-1(wt)	none	90	28	1.2255
CMK-1(wt)	none	90	28	0.811997
CMK-1(wt)	none	90	28	0.783859
CMK-1(wt)	none	90	28	0.786631
CMK-1(wt)	none	90	28	1.19404
CMK-1(wt)	none	90	28	1.08692
CMK-1(wt)	none	90	28	1.16595
CMK-1(wt)	none	90	28	0.988517
CMK-1(wt)	none	90	28	0.981891
CMK-1(wt)	none	90	28	0.819592
CMK-1(wt)	none	90	28	1.33168
CMK-1(wt)	none	90	28	1.29446
CMK-1(wt)	none	90	28	1.26506
CMK-1(wt)	none	90	28	1.1362
CMK-1(wt)	none	90	28	1.85868
CMK-1(wt)	none	90	28	1.27453
CMK-1(wt)	none	90	28	1.46211
CMK-1(wt)	none	90	28	1.75509
CMK-1(wt)	none	90	28	1.3478
CMK-1(wt)	none	90	28	0.808541
CMK-1(wt)	none	90	28	0.848597
CMK-1(wt)	none	90	28	1.02195
CMK-1(wt)	none	90	28	1.48577
CMK-1(wt)	none	90	28	0.819411
CMK-1(wt)	none	90	28	1.16648
CMK-1(wt)	none	90	28	0.724393
CMK-1(wt)	none	90	28	0.9657
CMK-1(wt)	none	90	28	0.935253
CMK-1(wt)	none	90	28	0.926235
CMK-1(wt)	none	90	28	1.09624
CMK-1(wt)	none	90	28	1.01826
CMK-1(wt)	none	90	28	0.71697
CMK-1(wt)	none	90	28	1.02294
CMK-1(wt)	none	90	28	0.938415
CMK-1(wt)	none	90	28	0.836564
CMK-1(wt)	none	90	28	1.16862
CMK-1(wt)	none	90	28	1.16119
CMK-1(wt)	none	90	28	1.17402
CMK-1(wt)	none	90	28	0.93681
CMK-1(wt)	none	90	28	1.14149
CMK-1(wt)	none	90	28	1.1209
CMK-1(wt)	none	90	28	1.17144
CMK-1(wt)	none	90	28	0.948739
CMK-1(wt)	none	90	28	1.3105
CMK-1(wt)	none	90	28	0.708037
CMK-1(wt)	none	90	28	0.972255
CMK-1(wt)	none	90	28	0.969462
CMK-1(wt)	none	90	28	1.00384
CMK-1(wt)	none	90	28	0.929535
CMK-1(wt)	none	90	28	1.18355
CMK-1(wt)	none	90	28	1.08961
CMK-1(wt)	none	90	28	1.65866
CMK-1(wt)	none	90	28	1.28683
CMK-1(wt)	none	90	28	0.99846
CMK-1(wt)	none	90	28	0.847323
CMK-1(wt)	none	90	28	0.936303
CMK-1(wt)	none	90	28	0.907096
CMK-1(wt)	none	90	28	1.18069
CMK-1(wt)	none	90	28	1.39098
CMK-1(wt)	none	90	28	1.67995
CMK-1(wt)	none	90	28	0.807371
CMK-1(wt)	none	90	28	1.48119
CMK-1(wt)	none	90	28	0.849587
CMK-1(wt)	none	90	28	1.0678
CMK-1(wt)	none	90	28	0.780048
CMK-1(wt)	none	90	28	1.13162
CMK-1(wt)	none	90	28	0.975229
CMK-1(wt)	none	90	28	0.830102
CMK-1(wt)	none	90	28	1.06907
CMK-1(wt)	none	90	28	0.899066
CMK-1(wt)	none	90	28	0.887416
CMK-1(wt)	none	90	28	1.08648
CMK-1(wt)	none	90	28	0.923831
CMK-1(wt)	none	90	28	1.11525
CMK-1(wt)	none	90	28	1.30826
CMK-1(wt)	none	90	28	1.039
CMK-1(wt)	none	90	28	1.05198
CMK-1(wt)	none	90	28	1.06561
CMK-1(wt)	none	90	28	1.0389
CMK-1(wt)	none	90	28	1.07206
CMK-1(wt)	none	90	28	1.01383
CMK-1(wt)	none	90	28	1.2069
CMK-1(wt)	none	90	28	1.17644
CMK-1(wt)	none	90	28	1.37886
CMK-1(wt)	none	90	28	0.974274
CMK-1(wt)	none	90	28	1.09682
CMK-1(wt)	none	90	28	0.903408
CMK-1(wt)	none	90	28	0.954364
CMK-1(wt)	none	90	28	0.955098
CMK-1(wt)	none	90	28	1.34343
CMK-1(wt)	none	90	28	1.24658
CMK-1(wt)	none	90	28	1.25819
CMK-1(wt)	none	90	28	0.846004
CMK-1(wt)	none	90	28	1.24238
CMK-1(wt)	none	90	28	0.969955
CMK-1(wt)	none	90	28	1.24477
CMK-1(wt)	none	90	28	1.24598
CMK-1(wt)	none	90	28	0.95283
CMK-1(wt)	none	90	28	1.15198
CMK-1(wt)	none	90	28	0.87884
CMK-1(wt)	none	90	28	1.14704
CMK-1(wt)	none	90	28	0.972644
CMK-1(wt)	none	90	28	1.02147
CMK-1(wt)	none	90	28	1.01411
CMK-1(wt)	none	90	28	1.01167
CMK-1(wt)	none	90	28	1.08432
CMK-1(wt)	none	90	28	1.10642
CMK-1(wt)	none	90	28	1.18189
CMK-1(wt)	none	90	28	1.1407
CMK-1(wt)	none	90	28	0.941962
CMK-1(wt)	none	90	28	1.06306
CMK-1(wt)	none	90	28	1.29587
CMK-1(wt)	none	90	28	0.905843
CMK-1(wt)	none	90	28	1.12731
CMK-1(wt)	none	90	28	1.13492
CMK-1(wt)	none	90	28	1.10668
CMK-1(wt)	none	90	28	0.986063
CMK-1(wt)	none	90	28	0.959372
CMK-1(wt)	none	90	28	1.17063
CMK-1(wt)	none	90	28	1.12192
CMK-1(wt)	none	90	28	1.01653
CMK-1(wt)	none	90	28	0.9922
CMK-1(wt)	none	90	28	1.2757
CMK-1(wt)	none	90	28	0.933218
CMK-1(wt)	none	90	28	1.11137
CMK-1(wt)	none	90	28	1.12941
CMK-1(wt)	none	90	28	1.10527
CMK-1(wt)	none	90	28	0.88522
CMK-1(wt)	none	90	28	0.96545
CMK-1(wt)	none	90	28	0.832001
CMK-1(wt)	none	90	28	1.00771
CMK-1(wt)	none	90	28	0.928861
CMK-1(wt)	none	90	28	0.759472
CMK-1(wt)	none	90	28	0.8824
CMK-1(wt)	none	90	28	1.38946
CMK-1(wt)	none	90	28	1.11335
CMK-1(wt)	none	90	28	0.968451
CMK-1(wt)	none	90	28	0.718822
CMK-1(wt)	none	90	28	0.855245
CMK-1(wt)	none	90	28	1.41479
CMK-1(wt)	none	90	28	0.440734
CMK-1(wt)	none	90	28	1.07158
CMK-1(wt)	none	90	28	0.99448
CMK-1(wt)	none	90	28	1.11871
CMK-1(wt)	none	90	28	1.06041
CMK-1(wt)	none	90	28	1.24532
CMK-1(wt)	none	90	28	1.31438
CMK-1(wt)	none	90	28	1.40785
CMK-1(wt)	none	90	28	1.03618
CMK-1(wt)	none	90	28	0.949
CMK-1(wt)	none	90	28	1.10149
CMK-1(wt)	none	90	28	1.63899
CMK-1(wt)	none	90	28	0.738995
CMK-1(wt)	none	90	28	1.26474
CMK-1(wt)	none	90	28	1.29381
CMK-1(wt)	none	90	28	1.41352
CMK-1(wt)	none	90	28	1.48619
CMK-1(wt)	none	90	28	1.02664
CMK-1(wt)	none	90	28	0.746594
CMK-1(wt)	none	90	28	0.982394
CMK-1(wt)	none	90	28	0.933078
CMK-1(wt)	none	90	28	0.810059
CMK-1(wt)	none	90	28	0.897424
CMK-1(wt)	none	90	28	0.751113
CMK-1(wt)	none	90	28	1.27491
CMK-1(wt)	none	90	28	0.952449
CMK-1(wt)	none	90	28	1.00497
CMK-1(wt)	none	90	28	0.788553
CMK-1(wt)	none	90	28	1.06553
CMK-1(wt)	none	90	28	1.13231
CMK-1(wt)	none	90	28	1.12543
CMK-1(wt)	none	90	28	0.93447
CMK-1(wt)	none	90	28	0.49608
CMK-1(wt)	none	90	28	1.01088
CMK-1(wt)	none	90	28	0.952353
CMK-1(wt)	none	90	28	0.765901
CMK-1(wt)	none	90	28	0.877167
CMK-1(wt)	none	90	28	1.11481
CMK-1(wt)	none	90	28	0.834296
CMK-1(wt)	none	90	28	0.851837
CMK-1(wt)	none	90	28	0.896971
CMK-1(V292A/V294A)	none	90	20	0.718374
CMK-1(V292A/V294A)	none	90	20	0.99926
CMK-1(V292A/V294A)	none	90	20	0.914754
CMK-1(V292A/V294A)	none	90	20	0.942927
CMK-1(V292A/V294A)	none	90	20	0.838333
CMK-1(V292A/V294A)	none	90	20	1.25822
CMK-1(V292A/V294A)	none	90	20	1.07197
CMK-1(V292A/V294A)	none	90	20	1.34457
CMK-1(V292A/V294A)	none	90	20	1.0777
CMK-1(V292A/V294A)	none	90	20	0.931065
CMK-1(V292A/V294A)	none	90	20	0.925359
CMK-1(V292A/V294A)	none	90	20	1
CMK-1(V292A/V294A)	none	90	20	1.32317
CMK-1(V292A/V294A)	none	90	20	1.21665
CMK-1(V292A/V294A)	none	90	20	1.04642
CMK-1(V292A/V294A)	none	90	20	1.09091
CMK-1(V292A/V294A)	none	90	20	1.39815
CMK-1(V292A/V294A)	none	90	20	1.19393
CMK-1(V292A/V294A)	none	90	20	1.01166
CMK-1(V292A/V294A)	none	90	20	1.20176
CMK-1(V292A/V294A)	none	90	20	1.11809
CMK-1(V292A/V294A)	none	90	20	0.907213
CMK-1(V292A/V294A)	none	90	20	1.13376
CMK-1(V292A/V294A)	none	90	20	1.07773
CMK-1(V292A/V294A)	none	90	20	1.10578
CMK-1(V292A/V294A)	none	90	20	1.21353
CMK-1(V292A/V294A)	none	90	20	0.812888
CMK-1(V292A/V294A)	none	90	20	1.24738
CMK-1(V292A/V294A)	none	90	20	1.02349
CMK-1(V292A/V294A)	none	90	20	1.27247
CMK-1(V292A/V294A)	none	90	20	0.723171
CMK-1(V292A/V294A)	none	90	20	1.12827
CMK-1(V292A/V294A)	none	90	20	0.861608
CMK-1(V292A/V294A)	none	90	20	1.42673
CMK-1(V292A/V294A)	none	90	20	1.58539
CMK-1(V292A/V294A)	none	90	20	1.11306
CMK-1(V292A/V294A)	none	90	20	0.948495
CMK-1(V292A/V294A)	none	90	20	1.06198
CMK-1(V292A/V294A)	none	90	20	1.3506
CMK-1(V292A/V294A)	none	90	20	0.821282
CMK-1(V292A/V294A)	none	90	20	0.9262
CMK-1(V292A/V294A)	none	90	20	0.892748
CMK-1(V292A/V294A)	none	90	20	1.08233
CMK-1(V292A/V294A)	none	90	20	0.724164
CMK-1(V292A/V294A)	none	90	20	0.861804
CMK-1(V292A/V294A)	none	90	20	0.916577
CMK-1(V292A/V294A)	none	90	20	0.968034
CMK-1(V292A/V294A)	none	90	20	0.595703
CMK-1(V292A/V294A)	none	90	20	0.725904
CMK-1(V292A/V294A)	none	90	20	0.998387
CMK-1(V292A/V294A)	none	90	20	0.905343
CMK-1(V292A/V294A)	none	90	20	0.873296
CMK-1(V292A/V294A)	none	90	20	0.913983
CMK-1(V292A/V294A)	none	90	20	0.634695
CMK-1(V292A/V294A)	none	90	20	0.711281
CMK-1(V292A/V294A)	none	90	20	0.9824
CMK-1(V292A/V294A)	none	90	20	0.909966
CMK-1(V292A/V294A)	none	90	20	1.14894
CMK-1(V292A/V294A)	none	90	20	0.995139
CMK-1(V292A/V294A)	none	90	20	0.788306
CMK-1(V292A/V294A)	none	90	20	1.02456
CMK-1(V292A/V294A)	none	90	20	0.860839
CMK-1(V292A/V294A)	none	90	20	1.22895
CMK-1(V292A/V294A)	none	90	20	1.02518
CMK-1(V292A/V294A)	none	90	20	0.981471
CMK-1(V292A/V294A)	none	90	20	1.0585
CMK-1(V292A/V294A)	none	90	20	1.08363
CMK-1(V292A/V294A)	none	90	20	0.9414
CMK-1(V292A/V294A)	none	90	20	1.20692
CMK-1(V292A/V294A)	none	90	20	1.22649
CMK-1(V292A/V294A)	none	90	20	1.10715
CMK-1(V292A/V294A)	none	90	20	1.08095
CMK-1(V292A/V294A)	none	90	20	0.998444
CMK-1(V292A/V294A)	none	90	20	1.0031
CMK-1(V292A/V294A)	none	90	20	1.56071
CMK-1(V292A/V294A)	none	90	20	1.18526
CMK-1(V292A/V294A)	none	90	20	1.00551
CMK-1(V292A/V294A)	none	90	20	1.17196
CMK-1(V292A/V294A)	none	90	20	0.963127
CMK-1(V292A/V294A)	none	90	20	1.01961
CMK-1(V292A/V294A)	none	90	20	1.57234
CMK-1(V292A/V294A)	none	90	20	0.82808
CMK-1(V292A/V294A)	none	90	20	0.888901
CMK-1(V292A/V294A)	none	90	20	0.96319
CMK-1(V292A/V294A)	none	90	20	0.581603
CMK-1(V292A/V294A)	none	90	20	1.1183
CMK-1(V292A/V294A)	none	90	20	0.754202
CMK-1(V292A/V294A)	none	90	20	2.53054
CMK-1(V292A/V294A)	none	90	20	1.55233
CMK-1(V292A/V294A)	none	90	20	0.784247
CMK-1(V292A/V294A)	none	90	20	1.06717
CMK-1(V292A/V294A)	none	90	20	1.69911
CMK-1(V292A/V294A)	none	90	20	1.55834
CMK-1(V292A/V294A)	none	90	20	1.06133
CMK-1(V292A/V294A)	none	90	20	2.06107
CMK-1(V292A/V294A)	none	90	20	1.00419
CMK-1(V292A/V294A)	none	90	20	1.05602
[truncated: 5,212 more rows]
