# Supplementary material for: Ca2+/CaM binding to CaMKI promotes IMA-3 importin binding and nuclear translocation in sensory neurons to control behavioral adaptation
Source: eLife. 2021 Nov 12;10:e71443. doi: 10.7554/eLife.71443 (PMC8635976; doi:10.7554/eLife.71443)
Supplement: Figure 2—source data 1. [file elife-71443-fig2-data1.xlsx]

## Sheet: Figure 2-source data
Summary statistics reported in the main figure
CMK-1 transgene	Genotype	Time (min)	Temperature (°C)	Mean ratio	SEM ratio
CMK-1(wt)	unc-13	90	20	0.816	0.0225
CMK-1(wt)	unc-13	90	28	1.03	0.0232
CMK-1(wt)	unc-31	90	20	0.79	0.0223
CMK-1(wt)	unc-31	90	28	1.07	0.0177
CMK-1(wt)	wt	90	20	0.759	0.021
CMK-1(wt)	wt	90	28	1.06	0.0212
CMK-1(wt)	wild type	90	20	0.793114	0.0203123
CMK-1(wt)	egl-19(n582)	90	20	0.751593	0.0387587
CMK-1(wt)	unc-2(gk366)	90	20	0.818922	0.0239121
CMK-1(wt)	unc-2(ra612)	90	20	0.79505	0.0216713
CMK-1(wt)	ocr-2(ak47); osm-9(ky5)	90	20	0.776051	0.022612
CMK-1(wt)	unc-68(r1161)	90	20	0.775405	0.0201274
CMK-1(wt)	wild type	90	28	1.10067	0.0253816
CMK-1(wt)	egl-19(n582)	90	28	1.16283	0.0522472
CMK-1(wt)	unc-2(gk366)	90	28	1.14461	0.0325901
CMK-1(wt)	unc-2(ra612)	90	28	1.20154	0.0281631
CMK-1(wt)	ocr-2(ak47); osm-9(ky5)	90	28	1.08595	0.0277032
CMK-1(wt)	unc-68(r1161)	90	28	1.0929	0.0206702
CMK-1(wt)	control (calbindin)	90	20	0.749749	0.00980512
CMK-1(wt)	+[mec-3p::Calbindin]	90	20	0.74723	0.0106837
CMK-1(wt)	control (calbindin)	90	28	0.972917	0.0107744
CMK-1(wt)	+[mec-3p::Calbindin]	90	28	0.811039	0.00943914
Raw data unc-13/unc-31 analysis
CMK-1 transgene	Genotype	Time (min)	Temperature (°C)	Ratio
CMK-1(wt)	wt	90	20	0.399989
CMK-1(wt)	wt	90	20	0.449251
CMK-1(wt)	wt	90	20	0.526514
CMK-1(wt)	wt	90	20	0.533275
CMK-1(wt)	wt	90	20	0.565682
CMK-1(wt)	wt	90	20	0.581594
CMK-1(wt)	wt	90	20	0.584403
CMK-1(wt)	wt	90	20	0.58546
CMK-1(wt)	wt	90	20	0.588115
CMK-1(wt)	wt	90	20	0.592651
CMK-1(wt)	wt	90	20	0.595921
CMK-1(wt)	wt	90	20	0.609678
CMK-1(wt)	wt	90	20	0.615807
CMK-1(wt)	wt	90	20	0.629523
CMK-1(wt)	wt	90	20	0.631269
CMK-1(wt)	wt	90	20	0.632265
CMK-1(wt)	wt	90	20	0.634241
CMK-1(wt)	wt	90	20	0.636356
CMK-1(wt)	wt	90	20	0.638805
CMK-1(wt)	wt	90	20	0.643861
CMK-1(wt)	wt	90	20	0.646968
CMK-1(wt)	wt	90	20	0.649483
CMK-1(wt)	wt	90	20	0.653858
CMK-1(wt)	wt	90	20	0.65552
CMK-1(wt)	wt	90	20	0.67459
CMK-1(wt)	wt	90	20	0.688152
CMK-1(wt)	wt	90	20	0.701449
CMK-1(wt)	wt	90	20	0.706718
CMK-1(wt)	wt	90	20	0.707059
CMK-1(wt)	wt	90	20	0.715738
CMK-1(wt)	wt	90	20	0.718804
CMK-1(wt)	wt	90	20	0.720726
CMK-1(wt)	wt	90	20	0.72148
CMK-1(wt)	wt	90	20	0.728977
CMK-1(wt)	wt	90	20	0.739519
CMK-1(wt)	wt	90	20	0.742684
CMK-1(wt)	wt	90	20	0.743566
CMK-1(wt)	wt	90	20	0.75277
CMK-1(wt)	wt	90	20	0.755371
CMK-1(wt)	wt	90	20	0.781564
CMK-1(wt)	wt	90	20	0.798649
CMK-1(wt)	wt	90	20	0.811549
CMK-1(wt)	wt	90	20	0.812292
CMK-1(wt)	wt	90	20	0.815197
CMK-1(wt)	wt	90	20	0.829304
CMK-1(wt)	wt	90	20	0.840088
CMK-1(wt)	wt	90	20	0.843644
CMK-1(wt)	wt	90	20	0.848418
CMK-1(wt)	wt	90	20	0.857917
CMK-1(wt)	wt	90	20	0.865456
CMK-1(wt)	wt	90	20	0.880376
CMK-1(wt)	wt	90	20	0.899686
CMK-1(wt)	wt	90	20	0.900216
CMK-1(wt)	wt	90	20	0.908271
CMK-1(wt)	wt	90	20	0.916667
CMK-1(wt)	wt	90	20	0.916667
CMK-1(wt)	wt	90	20	0.941416
CMK-1(wt)	wt	90	20	0.951205
CMK-1(wt)	wt	90	20	0.958415
CMK-1(wt)	wt	90	20	0.960045
CMK-1(wt)	wt	90	20	0.997062
CMK-1(wt)	wt	90	20	0.997108
CMK-1(wt)	wt	90	20	1.07892
CMK-1(wt)	wt	90	20	1.09152
CMK-1(wt)	wt	90	20	1.16943
CMK-1(wt)	wt	90	20	1.304
CMK-1(wt)	wt	90	28	0.585153
CMK-1(wt)	wt	90	28	0.673453
CMK-1(wt)	wt	90	28	0.694658
CMK-1(wt)	wt	90	28	0.749476
CMK-1(wt)	wt	90	28	0.760503
CMK-1(wt)	wt	90	28	0.762096
CMK-1(wt)	wt	90	28	0.779032
CMK-1(wt)	wt	90	28	0.792723
CMK-1(wt)	wt	90	28	0.796376
CMK-1(wt)	wt	90	28	0.806406
CMK-1(wt)	wt	90	28	0.816627
CMK-1(wt)	wt	90	28	0.834132
CMK-1(wt)	wt	90	28	0.850872
CMK-1(wt)	wt	90	28	0.851234
CMK-1(wt)	wt	90	28	0.859302
CMK-1(wt)	wt	90	28	0.875507
CMK-1(wt)	wt	90	28	0.890859
CMK-1(wt)	wt	90	28	0.917694
CMK-1(wt)	wt	90	28	0.919507
CMK-1(wt)	wt	90	28	0.919623
CMK-1(wt)	wt	90	28	0.922019
CMK-1(wt)	wt	90	28	0.925062
CMK-1(wt)	wt	90	28	0.943116
CMK-1(wt)	wt	90	28	0.946482
CMK-1(wt)	wt	90	28	0.947499
CMK-1(wt)	wt	90	28	0.952194
CMK-1(wt)	wt	90	28	0.954448
CMK-1(wt)	wt	90	28	0.95841
CMK-1(wt)	wt	90	28	0.961867
CMK-1(wt)	wt	90	28	0.971686
CMK-1(wt)	wt	90	28	0.981967
CMK-1(wt)	wt	90	28	0.985547
CMK-1(wt)	wt	90	28	0.985679
CMK-1(wt)	wt	90	28	0.986078
CMK-1(wt)	wt	90	28	0.987474
CMK-1(wt)	wt	90	28	0.988718
CMK-1(wt)	wt	90	28	0.998474
CMK-1(wt)	wt	90	28	0.999497
CMK-1(wt)	wt	90	28	1
CMK-1(wt)	wt	90	28	1.0005
CMK-1(wt)	wt	90	28	1.00145
CMK-1(wt)	wt	90	28	1.00641
CMK-1(wt)	wt	90	28	1.00906
CMK-1(wt)	wt	90	28	1.0139
CMK-1(wt)	wt	90	28	1.01646
CMK-1(wt)	wt	90	28	1.01746
CMK-1(wt)	wt	90	28	1.0204
CMK-1(wt)	wt	90	28	1.02144
CMK-1(wt)	wt	90	28	1.02217
CMK-1(wt)	wt	90	28	1.02423
CMK-1(wt)	wt	90	28	1.02519
CMK-1(wt)	wt	90	28	1.02722
CMK-1(wt)	wt	90	28	1.03185
CMK-1(wt)	wt	90	28	1.0391
CMK-1(wt)	wt	90	28	1.04007
CMK-1(wt)	wt	90	28	1.04031
CMK-1(wt)	wt	90	28	1.04351
CMK-1(wt)	wt	90	28	1.04632
CMK-1(wt)	wt	90	28	1.0619
CMK-1(wt)	wt	90	28	1.06481
CMK-1(wt)	wt	90	28	1.06514
CMK-1(wt)	wt	90	28	1.0692
CMK-1(wt)	wt	90	28	1.07492
CMK-1(wt)	wt	90	28	1.0847
CMK-1(wt)	wt	90	28	1.09272
CMK-1(wt)	wt	90	28	1.10028
CMK-1(wt)	wt	90	28	1.10678
CMK-1(wt)	wt	90	28	1.10729
CMK-1(wt)	wt	90	28	1.10753
CMK-1(wt)	wt	90	28	1.11278
CMK-1(wt)	wt	90	28	1.1133
CMK-1(wt)	wt	90	28	1.11411
CMK-1(wt)	wt	90	28	1.12747
CMK-1(wt)	wt	90	28	1.12984
CMK-1(wt)	wt	90	28	1.14812
CMK-1(wt)	wt	90	28	1.15052
CMK-1(wt)	wt	90	28	1.15482
CMK-1(wt)	wt	90	28	1.16967
CMK-1(wt)	wt	90	28	1.17357
CMK-1(wt)	wt	90	28	1.18274
CMK-1(wt)	wt	90	28	1.19422
CMK-1(wt)	wt	90	28	1.20123
CMK-1(wt)	wt	90	28	1.21288
CMK-1(wt)	wt	90	28	1.23157
CMK-1(wt)	wt	90	28	1.23486
CMK-1(wt)	wt	90	28	1.24833
CMK-1(wt)	wt	90	28	1.24849
CMK-1(wt)	wt	90	28	1.25929
CMK-1(wt)	wt	90	28	1.26287
CMK-1(wt)	wt	90	28	1.27561
CMK-1(wt)	wt	90	28	1.28572
CMK-1(wt)	wt	90	28	1.29428
CMK-1(wt)	wt	90	28	1.29706
CMK-1(wt)	wt	90	28	1.29768
CMK-1(wt)	wt	90	28	1.30641
CMK-1(wt)	wt	90	28	1.33248
CMK-1(wt)	wt	90	28	1.37191
CMK-1(wt)	wt	90	28	1.40249
CMK-1(wt)	wt	90	28	1.5279
CMK-1(wt)	wt	90	28	1.66583
CMK-1(wt)	wt	90	28	1.73262
CMK-1(wt)	wt	90	28	2.05528
CMK-1(wt)	unc-13	90	20	0.500741
CMK-1(wt)	unc-13	90	20	0.525239
CMK-1(wt)	unc-13	90	20	0.552037
CMK-1(wt)	unc-13	90	20	0.590744
CMK-1(wt)	unc-13	90	20	0.613214
CMK-1(wt)	unc-13	90	20	0.624826
CMK-1(wt)	unc-13	90	20	0.632943
CMK-1(wt)	unc-13	90	20	0.642768
CMK-1(wt)	unc-13	90	20	0.653138
CMK-1(wt)	unc-13	90	20	0.655301
CMK-1(wt)	unc-13	90	20	0.660909
CMK-1(wt)	unc-13	90	20	0.707359
CMK-1(wt)	unc-13	90	20	0.709521
CMK-1(wt)	unc-13	90	20	0.711934
CMK-1(wt)	unc-13	90	20	0.725748
CMK-1(wt)	unc-13	90	20	0.740512
CMK-1(wt)	unc-13	90	20	0.743318
CMK-1(wt)	unc-13	90	20	0.745128
CMK-1(wt)	unc-13	90	20	0.746052
CMK-1(wt)	unc-13	90	20	0.752363
CMK-1(wt)	unc-13	90	20	0.771246
CMK-1(wt)	unc-13	90	20	0.772623
CMK-1(wt)	unc-13	90	20	0.779885
CMK-1(wt)	unc-13	90	20	0.781868
CMK-1(wt)	unc-13	90	20	0.788612
CMK-1(wt)	unc-13	90	20	0.809812
CMK-1(wt)	unc-13	90	20	0.810318
CMK-1(wt)	unc-13	90	20	0.827666
CMK-1(wt)	unc-13	90	20	0.830549
CMK-1(wt)	unc-13	90	20	0.832089
CMK-1(wt)	unc-13	90	20	0.835288
CMK-1(wt)	unc-13	90	20	0.847136
CMK-1(wt)	unc-13	90	20	0.856332
CMK-1(wt)	unc-13	90	20	0.860146
CMK-1(wt)	unc-13	90	20	0.869015
CMK-1(wt)	unc-13	90	20	0.870581
CMK-1(wt)	unc-13	90	20	0.877642
CMK-1(wt)	unc-13	90	20	0.878721
CMK-1(wt)	unc-13	90	20	0.889138
CMK-1(wt)	unc-13	90	20	0.895816
CMK-1(wt)	unc-13	90	20	0.910872
CMK-1(wt)	unc-13	90	20	0.915905
CMK-1(wt)	unc-13	90	20	0.916395
CMK-1(wt)	unc-13	90	20	0.917649
CMK-1(wt)	unc-13	90	20	0.948671
CMK-1(wt)	unc-13	90	20	0.953794
CMK-1(wt)	unc-13	90	20	0.99805
CMK-1(wt)	unc-13	90	20	1.01694
CMK-1(wt)	unc-13	90	20	1.02054
CMK-1(wt)	unc-13	90	20	1.08846
CMK-1(wt)	unc-13	90	20	1.10856
CMK-1(wt)	unc-13	90	20	1.2198
CMK-1(wt)	unc-13	90	20	1.31756
CMK-1(wt)	unc-13	90	28	0.580137
CMK-1(wt)	unc-13	90	28	0.646783
CMK-1(wt)	unc-13	90	28	0.653288
CMK-1(wt)	unc-13	90	28	0.748815
CMK-1(wt)	unc-13	90	28	0.75119
CMK-1(wt)	unc-13	90	28	0.751926
CMK-1(wt)	unc-13	90	28	0.781386
CMK-1(wt)	unc-13	90	28	0.782606
CMK-1(wt)	unc-13	90	28	0.782955
CMK-1(wt)	unc-13	90	28	0.78456
CMK-1(wt)	unc-13	90	28	0.819419
CMK-1(wt)	unc-13	90	28	0.82397
CMK-1(wt)	unc-13	90	28	0.834859
CMK-1(wt)	unc-13	90	28	0.85844
CMK-1(wt)	unc-13	90	28	0.859384
CMK-1(wt)	unc-13	90	28	0.868792
CMK-1(wt)	unc-13	90	28	0.915569
CMK-1(wt)	unc-13	90	28	0.917678
CMK-1(wt)	unc-13	90	28	0.92267
CMK-1(wt)	unc-13	90	28	0.935341
CMK-1(wt)	unc-13	90	28	0.936194
CMK-1(wt)	unc-13	90	28	0.941362
CMK-1(wt)	unc-13	90	28	0.945455
CMK-1(wt)	unc-13	90	28	0.948026
CMK-1(wt)	unc-13	90	28	0.963084
CMK-1(wt)	unc-13	90	28	0.970487
CMK-1(wt)	unc-13	90	28	0.97099
CMK-1(wt)	unc-13	90	28	0.975703
CMK-1(wt)	unc-13	90	28	0.978187
CMK-1(wt)	unc-13	90	28	0.980456
CMK-1(wt)	unc-13	90	28	0.992925
CMK-1(wt)	unc-13	90	28	1
CMK-1(wt)	unc-13	90	28	1.00763
CMK-1(wt)	unc-13	90	28	1.00874
CMK-1(wt)	unc-13	90	28	1.01181
CMK-1(wt)	unc-13	90	28	1.01745
CMK-1(wt)	unc-13	90	28	1.01987
CMK-1(wt)	unc-13	90	28	1.02301
CMK-1(wt)	unc-13	90	28	1.02781
CMK-1(wt)	unc-13	90	28	1.03173
CMK-1(wt)	unc-13	90	28	1.03799
CMK-1(wt)	unc-13	90	28	1.03815
CMK-1(wt)	unc-13	90	28	1.03849
CMK-1(wt)	unc-13	90	28	1.03996
CMK-1(wt)	unc-13	90	28	1.0428
CMK-1(wt)	unc-13	90	28	1.04378
CMK-1(wt)	unc-13	90	28	1.05235
CMK-1(wt)	unc-13	90	28	1.06014
CMK-1(wt)	unc-13	90	28	1.06491
CMK-1(wt)	unc-13	90	28	1.06566
CMK-1(wt)	unc-13	90	28	1.07725
CMK-1(wt)	unc-13	90	28	1.08459
CMK-1(wt)	unc-13	90	28	1.0877
CMK-1(wt)	unc-13	90	28	1.10022
CMK-1(wt)	unc-13	90	28	1.12746
CMK-1(wt)	unc-13	90	28	1.13373
CMK-1(wt)	unc-13	90	28	1.14256
CMK-1(wt)	unc-13	90	28	1.15705
CMK-1(wt)	unc-13	90	28	1.16628
CMK-1(wt)	unc-13	90	28	1.16936
CMK-1(wt)	unc-13	90	28	1.21053
CMK-1(wt)	unc-13	90	28	1.21715
CMK-1(wt)	unc-13	90	28	1.22444
CMK-1(wt)	unc-13	90	28	1.22631
CMK-1(wt)	unc-13	90	28	1.22743
CMK-1(wt)	unc-13	90	28	1.24396
CMK-1(wt)	unc-13	90	28	1.24541
CMK-1(wt)	unc-13	90	28	1.24884
CMK-1(wt)	unc-13	90	28	1.27277
CMK-1(wt)	unc-13	90	28	1.31913
CMK-1(wt)	unc-13	90	28	1.33781
CMK-1(wt)	unc-13	90	28	1.40228
CMK-1(wt)	unc-13	90	28	1.45973
CMK-1(wt)	unc-13	90	28	1.49801
CMK-1(wt)	unc-13	90	28	1.73643
CMK-1(wt)	unc-31	90	20	0.33607
CMK-1(wt)	unc-31	90	20	0.34556
CMK-1(wt)	unc-31	90	20	0.437336
CMK-1(wt)	unc-31	90	20	0.549192
CMK-1(wt)	unc-31	90	20	0.553114
CMK-1(wt)	unc-31	90	20	0.559398
CMK-1(wt)	unc-31	90	20	0.559975
CMK-1(wt)	unc-31	90	20	0.561698
CMK-1(wt)	unc-31	90	20	0.562146
CMK-1(wt)	unc-31	90	20	0.568101
CMK-1(wt)	unc-31	90	20	0.595279
CMK-1(wt)	unc-31	90	20	0.617438
CMK-1(wt)	unc-31	90	20	0.6213
CMK-1(wt)	unc-31	90	20	0.621842
CMK-1(wt)	unc-31	90	20	0.634362
CMK-1(wt)	unc-31	90	20	0.638074
CMK-1(wt)	unc-31	90	20	0.646399
CMK-1(wt)	unc-31	90	20	0.673071
CMK-1(wt)	unc-31	90	20	0.676176
CMK-1(wt)	unc-31	90	20	0.69214
CMK-1(wt)	unc-31	90	20	0.703885
CMK-1(wt)	unc-31	90	20	0.708071
CMK-1(wt)	unc-31	90	20	0.711311
CMK-1(wt)	unc-31	90	20	0.726933
CMK-1(wt)	unc-31	90	20	0.734664
CMK-1(wt)	unc-31	90	20	0.736214
CMK-1(wt)	unc-31	90	20	0.742747
CMK-1(wt)	unc-31	90	20	0.744833
CMK-1(wt)	unc-31	90	20	0.750637
CMK-1(wt)	unc-31	90	20	0.755335
CMK-1(wt)	unc-31	90	20	0.759495
CMK-1(wt)	unc-31	90	20	0.767777
CMK-1(wt)	unc-31	90	20	0.770711
CMK-1(wt)	unc-31	90	20	0.781822
CMK-1(wt)	unc-31	90	20	0.795917
CMK-1(wt)	unc-31	90	20	0.799303
CMK-1(wt)	unc-31	90	20	0.812167
CMK-1(wt)	unc-31	90	20	0.81302
CMK-1(wt)	unc-31	90	20	0.813589
CMK-1(wt)	unc-31	90	20	0.820258
CMK-1(wt)	unc-31	90	20	0.82523
CMK-1(wt)	unc-31	90	20	0.856948
CMK-1(wt)	unc-31	90	20	0.866766
CMK-1(wt)	unc-31	90	20	0.871154
CMK-1(wt)	unc-31	90	20	0.876483
CMK-1(wt)	unc-31	90	20	0.879559
CMK-1(wt)	unc-31	90	20	0.888098
CMK-1(wt)	unc-31	90	20	0.898765
CMK-1(wt)	unc-31	90	20	0.90214
CMK-1(wt)	unc-31	90	20	0.935061
CMK-1(wt)	unc-31	90	20	0.938171
CMK-1(wt)	unc-31	90	20	0.9569
CMK-1(wt)	unc-31	90	20	0.958164
CMK-1(wt)	unc-31	90	20	0.958492
CMK-1(wt)	unc-31	90	20	0.958611
CMK-1(wt)	unc-31	90	20	0.959326
CMK-1(wt)	unc-31	90	20	0.963588
CMK-1(wt)	unc-31	90	20	0.965804
CMK-1(wt)	unc-31	90	20	0.967142
CMK-1(wt)	unc-31	90	20	0.973745
CMK-1(wt)	unc-31	90	20	0.973797
CMK-1(wt)	unc-31	90	20	0.981928
CMK-1(wt)	unc-31	90	20	0.995696
CMK-1(wt)	unc-31	90	20	1.01783
CMK-1(wt)	unc-31	90	20	1.07105
CMK-1(wt)	unc-31	90	20	1.16237
CMK-1(wt)	unc-31	90	20	1.19384
CMK-1(wt)	unc-31	90	20	1.21071
CMK-1(wt)	unc-31	90	28	0.640308
CMK-1(wt)	unc-31	90	28	0.762661
CMK-1(wt)	unc-31	90	28	0.84817
CMK-1(wt)	unc-31	90	28	0.877726
CMK-1(wt)	unc-31	90	28	0.887802
CMK-1(wt)	unc-31	90	28	0.906328
CMK-1(wt)	unc-31	90	28	0.91207
CMK-1(wt)	unc-31	90	28	0.916665
CMK-1(wt)	unc-31	90	28	0.928399
CMK-1(wt)	unc-31	90	28	0.952135
CMK-1(wt)	unc-31	90	28	0.955216
CMK-1(wt)	unc-31	90	28	0.959715
CMK-1(wt)	unc-31	90	28	0.962786
CMK-1(wt)	unc-31	90	28	0.964382
CMK-1(wt)	unc-31	90	28	0.969499
CMK-1(wt)	unc-31	90	28	0.974103
CMK-1(wt)	unc-31	90	28	0.976102
CMK-1(wt)	unc-31	90	28	0.977485
CMK-1(wt)	unc-31	90	28	0.986788
CMK-1(wt)	unc-31	90	28	0.989555
CMK-1(wt)	unc-31	90	28	0.989663
CMK-1(wt)	unc-31	90	28	0.990721
CMK-1(wt)	unc-31	90	28	0.996954
CMK-1(wt)	unc-31	90	28	1.00416
CMK-1(wt)	unc-31	90	28	1.00913
CMK-1(wt)	unc-31	90	28	1.0108
CMK-1(wt)	unc-31	90	28	1.01475
CMK-1(wt)	unc-31	90	28	1.01519
CMK-1(wt)	unc-31	90	28	1.01985
CMK-1(wt)	unc-31	90	28	1.02021
CMK-1(wt)	unc-31	90	28	1.02245
CMK-1(wt)	unc-31	90	28	1.02469
CMK-1(wt)	unc-31	90	28	1.02732
CMK-1(wt)	unc-31	90	28	1.03256
CMK-1(wt)	unc-31	90	28	1.03401
CMK-1(wt)	unc-31	90	28	1.03465
CMK-1(wt)	unc-31	90	28	1.03546
CMK-1(wt)	unc-31	90	28	1.03616
CMK-1(wt)	unc-31	90	28	1.04172
CMK-1(wt)	unc-31	90	28	1.04283
CMK-1(wt)	unc-31	90	28	1.04424
CMK-1(wt)	unc-31	90	28	1.04587
CMK-1(wt)	unc-31	90	28	1.0582
CMK-1(wt)	unc-31	90	28	1.07039
CMK-1(wt)	unc-31	90	28	1.07468
CMK-1(wt)	unc-31	90	28	1.09388
CMK-1(wt)	unc-31	90	28	1.10411
CMK-1(wt)	unc-31	90	28	1.10415
CMK-1(wt)	unc-31	90	28	1.10929
CMK-1(wt)	unc-31	90	28	1.13704
CMK-1(wt)	unc-31	90	28	1.15143
CMK-1(wt)	unc-31	90	28	1.16267
CMK-1(wt)	unc-31	90	28	1.16676
CMK-1(wt)	unc-31	90	28	1.16743
CMK-1(wt)	unc-31	90	28	1.172
CMK-1(wt)	unc-31	90	28	1.17831
CMK-1(wt)	unc-31	90	28	1.18184
CMK-1(wt)	unc-31	90	28	1.18224
CMK-1(wt)	unc-31	90	28	1.19976
CMK-1(wt)	unc-31	90	28	1.20951
CMK-1(wt)	unc-31	90	28	1.21172
CMK-1(wt)	unc-31	90	28	1.24034
CMK-1(wt)	unc-31	90	28	1.28011
CMK-1(wt)	unc-31	90	28	1.28648
CMK-1(wt)	unc-31	90	28	1.29688
CMK-1(wt)	unc-31	90	28	1.31307
CMK-1(wt)	unc-31	90	28	1.33695
CMK-1(wt)	unc-31	90	28	1.40942
CMK-1(wt)	unc-31	90	28	1.41485
CMK-1(wt)	unc-31	90	28	1.47693
Raw data unc-68 and CMK-1(W305S) mutation interaction analysis
CMK-1 transgene	unc-68 allele	Time (min)	Temperature (°C)	Ratio
CMK-1(wt)	wt	90	20	0.199462
CMK-1(wt)	wt	90	20	0.450712
CMK-1(wt)	wt	90	20	0.464293
CMK-1(wt)	wt	90	20	0.467442
CMK-1(wt)	wt	90	20	0.470685
CMK-1(wt)	wt	90	20	0.494694
CMK-1(wt)	wt	90	20	0.501777
CMK-1(wt)	wt	90	20	0.509095
CMK-1(wt)	wt	90	20	0.518977
CMK-1(wt)	wt	90	20	0.520431
CMK-1(wt)	wt	90	20	0.527006
CMK-1(wt)	wt	90	20	0.541806
CMK-1(wt)	wt	90	20	0.548841
CMK-1(wt)	wt	90	20	0.552094
CMK-1(wt)	wt	90	20	0.572984
CMK-1(wt)	wt	90	20	0.57306
CMK-1(wt)	wt	90	20	0.573966
CMK-1(wt)	wt	90	20	0.575471
CMK-1(wt)	wt	90	20	0.575808
CMK-1(wt)	wt	90	20	0.583067
CMK-1(wt)	wt	90	20	0.585446
CMK-1(wt)	wt	90	20	0.593547
CMK-1(wt)	wt	90	20	0.600012
CMK-1(wt)	wt	90	20	0.606093
CMK-1(wt)	wt	90	20	0.629307
CMK-1(wt)	wt	90	20	0.631583
CMK-1(wt)	wt	90	20	0.632171
CMK-1(wt)	wt	90	20	0.637596
CMK-1(wt)	wt	90	20	0.63901
CMK-1(wt)	wt	90	20	0.644371
CMK-1(wt)	wt	90	20	0.647934
CMK-1(wt)	wt	90	20	0.648099
CMK-1(wt)	wt	90	20	0.65276
CMK-1(wt)	wt	90	20	0.668996
CMK-1(wt)	wt	90	20	0.673165
CMK-1(wt)	wt	90	20	0.678486
CMK-1(wt)	wt	90	20	0.680095
CMK-1(wt)	wt	90	20	0.682584
CMK-1(wt)	wt	90	20	0.685648
CMK-1(wt)	wt	90	20	0.686846
CMK-1(wt)	wt	90	20	0.688527
CMK-1(wt)	wt	90	20	0.691767
CMK-1(wt)	wt	90	20	0.706276
CMK-1(wt)	wt	90	20	0.711561
CMK-1(wt)	wt	90	20	0.717632
CMK-1(wt)	wt	90	20	0.722055
CMK-1(wt)	wt	90	20	0.729688
CMK-1(wt)	wt	90	20	0.738782
CMK-1(wt)	wt	90	20	0.739158
CMK-1(wt)	wt	90	20	0.739716
CMK-1(wt)	wt	90	20	0.754001
CMK-1(wt)	wt	90	20	0.754358
CMK-1(wt)	wt	90	20	0.754881
CMK-1(wt)	wt	90	20	0.755726
CMK-1(wt)	wt	90	20	0.756858
CMK-1(wt)	wt	90	20	0.759254
CMK-1(wt)	wt	90	20	0.759306
CMK-1(wt)	wt	90	20	0.760756
CMK-1(wt)	wt	90	20	0.773151
CMK-1(wt)	wt	90	20	0.774622
CMK-1(wt)	wt	90	20	0.783562
CMK-1(wt)	wt	90	20	0.790815
CMK-1(wt)	wt	90	20	0.793379
CMK-1(wt)	wt	90	20	0.794424
CMK-1(wt)	wt	90	20	0.794666
CMK-1(wt)	wt	90	20	0.796845
CMK-1(wt)	wt	90	20	0.80241
CMK-1(wt)	wt	90	20	0.812898
CMK-1(wt)	wt	90	20	0.826959
CMK-1(wt)	wt	90	20	0.8286
CMK-1(wt)	wt	90	20	0.844117
CMK-1(wt)	wt	90	20	0.844748
CMK-1(wt)	wt	90	20	0.888731
CMK-1(wt)	wt	90	20	0.935567
CMK-1(wt)	wt	90	20	1.53348
CMK-1(wt)	wt	90	28	0.492675
CMK-1(wt)	wt	90	28	0.629429
CMK-1(wt)	wt	90	28	0.629561
CMK-1(wt)	wt	90	28	0.677878
CMK-1(wt)	wt	90	28	0.679906
CMK-1(wt)	wt	90	28	0.68121
CMK-1(wt)	wt	90	28	0.689721
CMK-1(wt)	wt	90	28	0.720364
CMK-1(wt)	wt	90	28	0.764359
CMK-1(wt)	wt	90	28	0.781401
CMK-1(wt)	wt	90	28	0.782388
CMK-1(wt)	wt	90	28	0.783263
CMK-1(wt)	wt	90	28	0.786012
CMK-1(wt)	wt	90	28	0.803534
CMK-1(wt)	wt	90	28	0.811853
CMK-1(wt)	wt	90	28	0.817804
CMK-1(wt)	wt	90	28	0.81872
CMK-1(wt)	wt	90	28	0.824779
CMK-1(wt)	wt	90	28	0.836126
CMK-1(wt)	wt	90	28	0.863104
CMK-1(wt)	wt	90	28	0.866552
CMK-1(wt)	wt	90	28	0.879786
CMK-1(wt)	wt	90	28	0.888116
CMK-1(wt)	wt	90	28	0.913046
CMK-1(wt)	wt	90	28	0.914252
CMK-1(wt)	wt	90	28	0.917688
CMK-1(wt)	wt	90	28	0.92363
CMK-1(wt)	wt	90	28	0.934564
CMK-1(wt)	wt	90	28	0.935664
CMK-1(wt)	wt	90	28	0.944795
CMK-1(wt)	wt	90	28	0.977604
CMK-1(wt)	wt	90	28	1.02371
CMK-1(wt)	wt	90	28	1.0254
CMK-1(wt)	wt	90	28	1.05124
CMK-1(wt)	wt	90	28	1.07001
CMK-1(wt)	wt	90	28	1.07167
CMK-1(wt)	wt	90	28	1.08393
CMK-1(wt)	wt	90	28	1.08575
CMK-1(wt)	wt	90	28	1.09428
CMK-1(wt)	wt	90	28	1.10366
CMK-1(wt)	wt	90	28	1.13565
CMK-1(wt)	wt	90	28	1.17079
CMK-1(wt)	wt	90	28	1.17854
CMK-1(wt)	wt	90	28	1.18088
CMK-1(wt)	wt	90	28	1.19516
CMK-1(wt)	wt	90	28	1.20021
CMK-1(wt)	wt	90	28	1.20323
CMK-1(wt)	wt	90	28	1.21036
CMK-1(wt)	wt	90	28	1.21677
CMK-1(wt)	wt	90	28	1.22624
CMK-1(wt)	wt	90	28	1.22758
CMK-1(wt)	wt	90	28	1.23446
CMK-1(wt)	wt	90	28	1.26738
CMK-1(wt)	wt	90	28	1.27645
CMK-1(wt)	wt	90	28	1.28801
CMK-1(wt)	wt	90	28	1.32049
CMK-1(wt)	wt	90	28	1.32303
CMK-1(wt)	wt	90	28	1.32334
CMK-1(wt)	wt	90	28	1.34388
CMK-1(wt)	wt	90	28	1.34951
CMK-1(wt)	wt	90	28	1.35171
CMK-1(wt)	wt	90	28	1.3789
CMK-1(wt)	wt	90	28	1.39141
CMK-1(wt)	wt	90	28	1.43699
CMK-1(wt)	wt	90	28	1.49876
CMK-1(wt)	wt	90	28	1.51751
CMK-1(wt)	wt	90	28	1.5187
CMK-1(wt)	wt	90	28	1.77294
CMK-1(wt)	wt	90	28	1.81856
CMK-1(wt)	dom13	90	20	0.127369
CMK-1(wt)	dom13	90	20	0.342146
CMK-1(wt)	dom13	90	20	0.365356
CMK-1(wt)	dom13	90	20	0.425949
CMK-1(wt)	dom13	90	20	0.447856
CMK-1(wt)	dom13	90	20	0.45342
CMK-1(wt)	dom13	90	20	0.478575
CMK-1(wt)	dom13	90	20	0.480208
CMK-1(wt)	dom13	90	20	0.482678
CMK-1(wt)	dom13	90	20	0.483579
CMK-1(wt)	dom13	90	20	0.495186
CMK-1(wt)	dom13	90	20	0.502895
CMK-1(wt)	dom13	90	20	0.510019
CMK-1(wt)	dom13	90	20	0.517905
CMK-1(wt)	dom13	90	20	0.523828
CMK-1(wt)	dom13	90	20	0.540231
CMK-1(wt)	dom13	90	20	0.556582
CMK-1(wt)	dom13	90	20	0.558412
CMK-1(wt)	dom13	90	20	0.621786
CMK-1(wt)	dom13	90	20	0.624212
CMK-1(wt)	dom13	90	20	0.637081
CMK-1(wt)	dom13	90	20	0.6387
CMK-1(wt)	dom13	90	20	0.648598
CMK-1(wt)	dom13	90	20	0.64967
CMK-1(wt)	dom13	90	20	0.651066
CMK-1(wt)	dom13	90	20	0.654085
CMK-1(wt)	dom13	90	20	0.668404
CMK-1(wt)	dom13	90	20	0.669685
CMK-1(wt)	dom13	90	20	0.670737
CMK-1(wt)	dom13	90	20	0.677041
CMK-1(wt)	dom13	90	20	0.678579
CMK-1(wt)	dom13	90	20	0.690829
CMK-1(wt)	dom13	90	20	0.694308
CMK-1(wt)	dom13	90	20	0.696523
CMK-1(wt)	dom13	90	20	0.698995
CMK-1(wt)	dom13	90	20	0.699142
CMK-1(wt)	dom13	90	20	0.706776
CMK-1(wt)	dom13	90	20	0.706833
CMK-1(wt)	dom13	90	20	0.71636
CMK-1(wt)	dom13	90	20	0.72119
CMK-1(wt)	dom13	90	20	0.721268
CMK-1(wt)	dom13	90	20	0.723518
CMK-1(wt)	dom13	90	20	0.723791
CMK-1(wt)	dom13	90	20	0.730198
CMK-1(wt)	dom13	90	20	0.731533
CMK-1(wt)	dom13	90	20	0.73849
CMK-1(wt)	dom13	90	20	0.73971
CMK-1(wt)	dom13	90	20	0.742289
CMK-1(wt)	dom13	90	20	0.744347
CMK-1(wt)	dom13	90	20	0.748423
CMK-1(wt)	dom13	90	20	0.758499
CMK-1(wt)	dom13	90	20	0.761307
CMK-1(wt)	dom13	90	20	0.762169
CMK-1(wt)	dom13	90	20	0.773009
CMK-1(wt)	dom13	90	20	0.77941
CMK-1(wt)	dom13	90	20	0.781747
CMK-1(wt)	dom13	90	20	0.787879
CMK-1(wt)	dom13	90	20	0.793146
CMK-1(wt)	dom13	90	20	0.796256
CMK-1(wt)	dom13	90	20	0.801772
CMK-1(wt)	dom13	90	20	0.80357
CMK-1(wt)	dom13	90	20	0.808032
CMK-1(wt)	dom13	90	20	0.812051
CMK-1(wt)	dom13	90	20	0.81229
CMK-1(wt)	dom13	90	20	0.813447
CMK-1(wt)	dom13	90	20	0.827757
CMK-1(wt)	dom13	90	20	0.831999
CMK-1(wt)	dom13	90	20	0.835778
CMK-1(wt)	dom13	90	20	0.843545
CMK-1(wt)	dom13	90	20	0.849184
CMK-1(wt)	dom13	90	20	0.849185
CMK-1(wt)	dom13	90	20	0.857722
CMK-1(wt)	dom13	90	20	0.872401
CMK-1(wt)	dom13	90	20	0.883031
CMK-1(wt)	dom13	90	20	0.885311
CMK-1(wt)	dom13	90	20	0.8865
CMK-1(wt)	dom13	90	20	0.906386
CMK-1(wt)	dom13	90	20	0.912595
CMK-1(wt)	dom13	90	20	0.91561
CMK-1(wt)	dom13	90	20	0.921173
CMK-1(wt)	dom13	90	20	0.922356
CMK-1(wt)	dom13	90	20	0.923515
CMK-1(wt)	dom13	90	20	0.927201
CMK-1(wt)	dom13	90	20	0.935491
CMK-1(wt)	dom13	90	20	0.937857
CMK-1(wt)	dom13	90	20	0.944215
CMK-1(wt)	dom13	90	20	0.948871
CMK-1(wt)	dom13	90	20	0.954055
CMK-1(wt)	dom13	90	20	0.961442
CMK-1(wt)	dom13	90	20	0.967164
CMK-1(wt)	dom13	90	20	0.974385
CMK-1(wt)	dom13	90	20	0.975638
CMK-1(wt)	dom13	90	20	0.985229
CMK-1(wt)	dom13	90	20	0.988687
CMK-1(wt)	dom13	90	20	1.00488
CMK-1(wt)	dom13	90	20	1.01227
CMK-1(wt)	dom13	90	20	1.01271
CMK-1(wt)	dom13	90	20	1.01466
CMK-1(wt)	dom13	90	20	1.01502
CMK-1(wt)	dom13	90	20	1.01903
CMK-1(wt)	dom13	90	20	1.01907
CMK-1(wt)	dom13	90	20	1.02024
CMK-1(wt)	dom13	90	20	1.03204
CMK-1(wt)	dom13	90	20	1.03778
CMK-1(wt)	dom13	90	20	1.04054
CMK-1(wt)	dom13	90	20	1.04653
CMK-1(wt)	dom13	90	20	1.05044
CMK-1(wt)	dom13	90	20	1.07546
CMK-1(wt)	dom13	90	20	1.08378
CMK-1(wt)	dom13	90	20	1.08833
CMK-1(wt)	dom13	90	20	1.09901
CMK-1(wt)	dom13	90	20	1.11581
CMK-1(wt)	dom13	90	20	1.1174
CMK-1(wt)	dom13	90	20	1.12623
CMK-1(wt)	dom13	90	20	1.12845
CMK-1(wt)	dom13	90	20	1.13244
CMK-1(wt)	dom13	90	20	1.14635
CMK-1(wt)	dom13	90	20	1.14747
CMK-1(wt)	dom13	90	20	1.14908
CMK-1(wt)	dom13	90	20	1.16143
CMK-1(wt)	dom13	90	20	1.18117
CMK-1(wt)	dom13	90	20	1.18152
CMK-1(wt)	dom13	90	20	1.18242
CMK-1(wt)	dom13	90	20	1.18735
CMK-1(wt)	dom13	90	20	1.21386
CMK-1(wt)	dom13	90	20	1.21605
CMK-1(wt)	dom13	90	20	1.23523
CMK-1(wt)	dom13	90	20	1.23625
CMK-1(wt)	dom13	90	20	1.25301
CMK-1(wt)	dom13	90	20	1.26742
CMK-1(wt)	dom13	90	20	1.3052
CMK-1(wt)	dom13	90	20	1.36042
CMK-1(wt)	dom13	90	20	1.39766
CMK-1(wt)	dom13	90	20	1.42428
CMK-1(wt)	dom13	90	20	2.0911
CMK-1(wt)	dom13	90	20	2.72298
CMK-1(wt)	dom13	90	28	0.583211
CMK-1(wt)	dom13	90	28	0.59404
CMK-1(wt)	dom13	90	28	0.68385
CMK-1(wt)	dom13	90	28	0.699024
CMK-1(wt)	dom13	90	28	0.726424
CMK-1(wt)	dom13	90	28	0.756691
CMK-1(wt)	dom13	90	28	0.783013
CMK-1(wt)	dom13	90	28	0.789438
CMK-1(wt)	dom13	90	28	0.792804
CMK-1(wt)	dom13	90	28	0.811658
CMK-1(wt)	dom13	90	28	0.821901
CMK-1(wt)	dom13	90	28	0.830175
CMK-1(wt)	dom13	90	28	0.832423
CMK-1(wt)	dom13	90	28	0.836304
CMK-1(wt)	dom13	90	28	0.839918
CMK-1(wt)	dom13	90	28	0.843503
CMK-1(wt)	dom13	90	28	0.843886
CMK-1(wt)	dom13	90	28	0.868604
CMK-1(wt)	dom13	90	28	0.881585
CMK-1(wt)	dom13	90	28	0.900633
CMK-1(wt)	dom13	90	28	0.91584
CMK-1(wt)	dom13	90	28	0.936682
CMK-1(wt)	dom13	90	28	0.937773
CMK-1(wt)	dom13	90	28	0.943143
CMK-1(wt)	dom13	90	28	0.965019
CMK-1(wt)	dom13	90	28	0.965519
CMK-1(wt)	dom13	90	28	0.965648
CMK-1(wt)	dom13	90	28	0.972946
CMK-1(wt)	dom13	90	28	0.983579
CMK-1(wt)	dom13	90	28	0.988875
CMK-1(wt)	dom13	90	28	0.990923
CMK-1(wt)	dom13	90	28	0.99184
CMK-1(wt)	dom13	90	28	0.997597
CMK-1(wt)	dom13	90	28	1.00402
CMK-1(wt)	dom13	90	28	1.01362
CMK-1(wt)	dom13	90	28	1.01493
CMK-1(wt)	dom13	90	28	1.01622
CMK-1(wt)	dom13	90	28	1.01742
CMK-1(wt)	dom13	90	28	1.01831
CMK-1(wt)	dom13	90	28	1.01891
CMK-1(wt)	dom13	90	28	1.03115
CMK-1(wt)	dom13	90	28	1.03809
CMK-1(wt)	dom13	90	28	1.04067
CMK-1(wt)	dom13	90	28	1.04749
CMK-1(wt)	dom13	90	28	1.04971
CMK-1(wt)	dom13	90	28	1.0556
CMK-1(wt)	dom13	90	28	1.05581
CMK-1(wt)	dom13	90	28	1.06416
CMK-1(wt)	dom13	90	28	1.06439
CMK-1(wt)	dom13	90	28	1.0655
CMK-1(wt)	dom13	90	28	1.07797
CMK-1(wt)	dom13	90	28	1.08114
CMK-1(wt)	dom13	90	28	1.08326
CMK-1(wt)	dom13	90	28	1.08754
CMK-1(wt)	dom13	90	28	1.09515
CMK-1(wt)	dom13	90	28	1.0979
CMK-1(wt)	dom13	90	28	1.09989
CMK-1(wt)	dom13	90	28	1.10543
CMK-1(wt)	dom13	90	28	1.11152
CMK-1(wt)	dom13	90	28	1.11917
CMK-1(wt)	dom13	90	28	1.11967
CMK-1(wt)	dom13	90	28	1.12149
CMK-1(wt)	dom13	90	28	1.12452
CMK-1(wt)	dom13	90	28	1.1291
CMK-1(wt)	dom13	90	28	1.1491
CMK-1(wt)	dom13	90	28	1.1573
CMK-1(wt)	dom13	90	28	1.15745
CMK-1(wt)	dom13	90	28	1.15752
CMK-1(wt)	dom13	90	28	1.16089
CMK-1(wt)	dom13	90	28	1.1745
CMK-1(wt)	dom13	90	28	1.17841
CMK-1(wt)	dom13	90	28	1.18712
CMK-1(wt)	dom13	90	28	1.19031
CMK-1(wt)	dom13	90	28	1.19626
CMK-1(wt)	dom13	90	28	1.2027
CMK-1(wt)	dom13	90	28	1.20695
CMK-1(wt)	dom13	90	28	1.20856
CMK-1(wt)	dom13	90	28	1.22178
CMK-1(wt)	dom13	90	28	1.22663
CMK-1(wt)	dom13	90	28	1.23874
CMK-1(wt)	dom13	90	28	1.23981
CMK-1(wt)	dom13	90	28	1.25134
CMK-1(wt)	dom13	90	28	1.25402
CMK-1(wt)	dom13	90	28	1.25411
CMK-1(wt)	dom13	90	28	1.2549
CMK-1(wt)	dom13	90	28	1.2551
CMK-1(wt)	dom13	90	28	1.25661
CMK-1(wt)	dom13	90	28	1.26257
CMK-1(wt)	dom13	90	28	1.27141
CMK-1(wt)	dom13	90	28	1.29099
CMK-1(wt)	dom13	90	28	1.29192
CMK-1(wt)	dom13	90	28	1.2973
CMK-1(wt)	dom13	90	28	1.30064
CMK-1(wt)	dom13	90	28	1.3061
CMK-1(wt)	dom13	90	28	1.30975
CMK-1(wt)	dom13	90	28	1.31238
CMK-1(wt)	dom13	90	28	1.315
CMK-1(wt)	dom13	90	28	1.32056
CMK-1(wt)	dom13	90	28	1.33567
CMK-1(wt)	dom13	90	28	1.33897
CMK-1(wt)	dom13	90	28	1.33948
CMK-1(wt)	dom13	90	28	1.34176
CMK-1(wt)	dom13	90	28	1.35376
CMK-1(wt)	dom13	90	28	1.36598
CMK-1(wt)	dom13	90	28	1.37026
CMK-1(wt)	dom13	90	28	1.37322
CMK-1(wt)	dom13	90	28	1.38042
CMK-1(wt)	dom13	90	28	1.39519
CMK-1(wt)	dom13	90	28	1.40043
CMK-1(wt)	dom13	90	28	1.4106
CMK-1(wt)	dom13	90	28	1.43577
CMK-1(wt)	dom13	90	28	1.44204
CMK-1(wt)	dom13	90	28	1.45862
CMK-1(wt)	dom13	90	28	1.4705
CMK-1(wt)	dom13	90	28	1.48806
CMK-1(wt)	dom13	90	28	1.4886
CMK-1(wt)	dom13	90	28	1.4984
CMK-1(wt)	dom13	90	28	1.5066
CMK-1(wt)	dom13	90	28	1.52306
CMK-1(wt)	dom13	90	28	1.52505
CMK-1(wt)	dom13	90	28	1.52963
CMK-1(wt)	dom13	90	28	1.56736
CMK-1(wt)	dom13	90	28	1.58351
CMK-1(wt)	dom13	90	28	1.58927
CMK-1(wt)	dom13	90	28	1.606
CMK-1(wt)	dom13	90	28	1.6135
CMK-1(wt)	dom13	90	28	1.62114
CMK-1(wt)	dom13	90	28	1.65695
CMK-1(wt)	dom13	90	28	1.73385
CMK-1(wt)	dom13	90	28	1.84422
CMK-1(wt)	dom13	90	28	1.91193
CMK-1(wt)	dom13	90	28	1.91942
CMK-1(wt)	dom13	90	28	1.94726
CMK-1(wt)	dom13	90	28	1.95342
CMK-1(wt)	dom13	90	28	2.4536
W305S	wt	90	20	0.363107
W305S	wt	90	20	0.379444
W305S	wt	90	20	0.390051
W305S	wt	90	20	0.406815
W305S	wt	90	20	0.407038
W305S	wt	90	20	0.415075
W305S	wt	90	20	0.422963
W305S	wt	90	20	0.43935
W305S	wt	90	20	0.446114
W305S	wt	90	20	0.451694
W305S	wt	90	20	0.456271
W305S	wt	90	20	0.457563
W305S	wt	90	20	0.458109
W305S	wt	90	20	0.480482
W305S	wt	90	20	0.48675
W305S	wt	90	20	0.490712
W305S	wt	90	20	0.494347
W305S	wt	90	20	0.503528
W305S	wt	90	20	0.506217
W305S	wt	90	20	0.511697
W305S	wt	90	20	0.517024
W305S	wt	90	20	0.518307
W305S	wt	90	20	0.533475
W305S	wt	90	20	0.534294
W305S	wt	90	20	0.541106
W305S	wt	90	20	0.547966
W305S	wt	90	20	0.551341
W305S	wt	90	20	0.557038
W305S	wt	90	20	0.560542
W305S	wt	90	20	0.562854
W305S	wt	90	20	0.563628
W305S	wt	90	20	0.566037
W305S	wt	90	20	0.570821
W305S	wt	90	20	0.572822
W305S	wt	90	20	0.573333
W305S	wt	90	20	0.574915
W305S	wt	90	20	0.577519
W305S	wt	90	20	0.578924
W305S	wt	90	20	0.587968
W305S	wt	90	20	0.588527
W305S	wt	90	20	0.601412
W305S	wt	90	20	0.603089
W305S	wt	90	20	0.605845
W305S	wt	90	20	0.619266
W305S	wt	90	20	0.624192
W305S	wt	90	20	0.624528
W305S	wt	90	20	0.635645
W305S	wt	90	20	0.635744
W305S	wt	90	20	0.639166
W305S	wt	90	20	0.649711
W305S	wt	90	20	0.651589
W305S	wt	90	20	0.65336
W305S	wt	90	20	0.656983
W305S	wt	90	20	0.660536
W305S	wt	90	20	0.662928
W305S	wt	90	20	0.664894
W305S	wt	90	20	0.670441
W305S	wt	90	20	0.676472
W305S	wt	90	20	0.68383
W305S	wt	90	20	0.68643
W305S	wt	90	20	0.686764
W305S	wt	90	20	0.687951
W305S	wt	90	20	0.692514
W305S	wt	90	20	0.695507
W305S	wt	90	20	0.69865
W305S	wt	90	20	0.701593
W305S	wt	90	20	0.704379
W305S	wt	90	20	0.708281
W305S	wt	90	20	0.712581
W305S	wt	90	20	0.713169
W305S	wt	90	20	0.717888
W305S	wt	90	20	0.72017
W305S	wt	90	20	0.727051
W305S	wt	90	20	0.728581
W305S	wt	90	20	0.732572
W305S	wt	90	20	0.742883
W305S	wt	90	20	0.746167
W305S	wt	90	20	0.746679
W305S	wt	90	20	0.751839
W305S	wt	90	20	0.756673
W305S	wt	90	20	0.763232
W305S	wt	90	20	0.772239
W305S	wt	90	20	0.777214
W305S	wt	90	20	0.77741
W305S	wt	90	20	0.782056
W305S	wt	90	20	0.785545
W305S	wt	90	20	0.805662
W305S	wt	90	20	0.809249
W305S	wt	90	20	0.810988
W305S	wt	90	20	0.813521
W305S	wt	90	20	0.821347
W305S	wt	90	20	0.830342
W305S	wt	90	20	0.831844
W305S	wt	90	20	0.832454
W305S	wt	90	20	0.835569
W305S	wt	90	20	0.851169
W305S	wt	90	20	0.85876
W305S	wt	90	20	0.881713
W305S	wt	90	20	0.882513
W305S	wt	90	20	0.893137
W305S	wt	90	20	0.899811
W305S	wt	90	20	0.905257
W305S	wt	90	20	0.906594
W305S	wt	90	20	0.910578
W305S	wt	90	20	0.911374
W305S	wt	90	20	0.924406
W305S	wt	90	20	0.986868
W305S	wt	90	20	1
W305S	wt	90	20	1.03042
W305S	wt	90	20	1.13326
W305S	wt	90	20	1.15991
W305S	wt	90	20	0.3219
W305S	wt	90	20	0.356249
W305S	wt	90	20	0.387804
W305S	wt	90	20	0.394685
W305S	wt	90	20	0.397615
W305S	wt	90	20	0.416344
W305S	wt	90	20	0.419776
W305S	wt	90	20	0.438539
W305S	wt	90	20	0.45162
W305S	wt	90	20	0.468769
W305S	wt	90	20	0.473047
W305S	wt	90	20	0.479759
W305S	wt	90	20	0.480001
W305S	wt	90	20	0.496771
W305S	wt	90	20	0.512935
W305S	wt	90	20	0.518622
W305S	wt	90	20	0.518938
W305S	wt	90	20	0.519504
W305S	wt	90	20	0.531274
W305S	wt	90	20	0.537124
W305S	wt	90	20	0.538937
W305S	wt	90	20	0.544163
W305S	wt	90	20	0.545906
W305S	wt	90	20	0.551594
W305S	wt	90	20	0.554904
W305S	wt	90	20	0.558044
W305S	wt	90	20	0.560319
W305S	wt	90	20	0.560914
W305S	wt	90	20	0.565177
W305S	wt	90	20	0.572465
W305S	wt	90	20	0.573579
W305S	wt	90	20	0.575276
W305S	wt	90	20	0.578262
W305S	wt	90	20	0.580763
W305S	wt	90	20	0.584229
W305S	wt	90	20	0.58455
W305S	wt	90	20	0.586092
W305S	wt	90	20	0.588959
W305S	wt	90	20	0.593842
W305S	wt	90	20	0.594693
W305S	wt	90	20	0.595184
W305S	wt	90	20	0.596925
W305S	wt	90	20	0.598523
W305S	wt	90	20	0.60595
W305S	wt	90	20	0.607942
W305S	wt	90	20	0.624998
W305S	wt	90	20	0.625884
W305S	wt	90	20	0.631356
W305S	wt	90	20	0.635149
W305S	wt	90	20	0.636576
W305S	wt	90	20	0.637662
W305S	wt	90	20	0.640034
W305S	wt	90	20	0.645965
W305S	wt	90	20	0.648526
W305S	wt	90	20	0.648542
W305S	wt	90	20	0.661213
W305S	wt	90	20	0.66365
W305S	wt	90	20	0.665387
W305S	wt	90	20	0.665807
W305S	wt	90	20	0.672289
W305S	wt	90	20	0.67637
W305S	wt	90	20	0.680214
W305S	wt	90	20	0.682124
W305S	wt	90	20	0.690604
W305S	wt	90	20	0.690922
W305S	wt	90	20	0.691012
W305S	wt	90	20	0.691424
W305S	wt	90	20	0.692678
W305S	wt	90	20	0.702661
W305S	wt	90	20	0.703578
W305S	wt	90	20	0.703832
W305S	wt	90	20	0.709922
W305S	wt	90	20	0.712136
W305S	wt	90	20	0.719446
W305S	wt	90	20	0.720557
W305S	wt	90	20	0.721852
W305S	wt	90	20	0.724435
W305S	wt	90	20	0.726396
W305S	wt	90	20	0.728777
W305S	wt	90	20	0.733615
W305S	wt	90	20	0.73596
W305S	wt	90	20	0.737189
W305S	wt	90	20	0.737739
W305S	wt	90	20	0.738485
W305S	wt	90	20	0.745708
W305S	wt	90	20	0.746143
W305S	wt	90	20	0.74753
W305S	wt	90	20	0.769862
W305S	wt	90	20	0.775558
W305S	wt	90	20	0.775934
W305S	wt	90	20	0.783503
W305S	wt	90	20	0.784726
W305S	wt	90	20	0.78642
W305S	wt	90	20	0.786671
W305S	wt	90	20	0.787056
W305S	wt	90	20	0.79879
W305S	wt	90	20	0.802654
W305S	wt	90	20	0.80522
W305S	wt	90	20	0.814358
W305S	wt	90	20	0.82189
W305S	wt	90	20	0.823143
W305S	wt	90	20	0.828833
W305S	wt	90	20	0.83328
W305S	wt	90	20	0.83399
W305S	wt	90	20	0.842788
W305S	wt	90	20	0.84331
W305S	wt	90	20	0.848074
W305S	wt	90	20	0.850548
W305S	wt	90	20	0.858737
W305S	wt	90	20	0.869588
W305S	wt	90	20	0.882498
W305S	wt	90	20	0.891009
W305S	wt	90	20	0.911429
W305S	wt	90	20	0.922296
W305S	wt	90	20	0.952771
W305S	wt	90	20	0.962777
W305S	wt	90	20	0.990269
W305S	wt	90	20	0.993144
W305S	wt	90	20	0.993144
W305S	wt	90	20	0.99492
W305S	wt	90	20	1.02965
W305S	wt	90	20	1.05162
W305S	wt	90	20	1.0642
W305S	wt	90	20	1.08914
W305S	wt	90	20	1.09557
W305S	wt	90	20	1.12339
W305S	wt	90	20	1.19627
W305S	wt	90	20	1.58346
W305S	wt	90	20	0.180296
W305S	wt	90	20	0.255436
W305S	wt	90	20	0.318205
W305S	wt	90	20	0.328028
W305S	wt	90	20	0.396871
W305S	wt	90	20	0.432346
W305S	wt	90	20	0.456714
W305S	wt	90	20	0.469407
W305S	wt	90	20	0.481237
W305S	wt	90	20	0.489301
W305S	wt	90	20	0.489702
W305S	wt	90	20	0.49804
W305S	wt	90	20	0.50214
W305S	wt	90	20	0.507653
W305S	wt	90	20	0.509538
W305S	wt	90	20	0.511243
W305S	wt	90	20	0.521578
W305S	wt	90	20	0.524803
W305S	wt	90	20	0.530534
W305S	wt	90	20	0.536727
W305S	wt	90	20	0.542672
W305S	wt	90	20	0.546182
W305S	wt	90	20	0.546949
W305S	wt	90	20	0.547088
W305S	wt	90	20	0.547132
W305S	wt	90	20	0.568778
W305S	wt	90	20	0.568953
W305S	wt	90	20	0.584726
W305S	wt	90	20	0.587833
W305S	wt	90	20	0.58965
W305S	wt	90	20	0.605309
W305S	wt	90	20	0.608467
W305S	wt	90	20	0.616691
W305S	wt	90	20	0.6193
W305S	wt	90	20	0.627445
W305S	wt	90	20	0.629747
W305S	wt	90	20	0.630463
W305S	wt	90	20	0.630572
W305S	wt	90	20	0.633596
W305S	wt	90	20	0.63528
W305S	wt	90	20	0.637577
W305S	wt	90	20	0.641012
W305S	wt	90	20	0.641718
W305S	wt	90	20	0.643385
W305S	wt	90	20	0.649298
W305S	wt	90	20	0.650324
W305S	wt	90	20	0.654664
W305S	wt	90	20	0.65853
W305S	wt	90	20	0.661442
W305S	wt	90	20	0.662489
W305S	wt	90	20	0.665477
W305S	wt	90	20	0.667593
W305S	wt	90	20	0.66836
W305S	wt	90	20	0.669908
W305S	wt	90	20	0.67675
W305S	wt	90	20	0.680312
W305S	wt	90	20	0.685
W305S	wt	90	20	0.685106
W305S	wt	90	20	0.696271
W305S	wt	90	20	0.697117
W305S	wt	90	20	0.701486
W305S	wt	90	20	0.702322
W305S	wt	90	20	0.702981
W305S	wt	90	20	0.706425
W305S	wt	90	20	0.723593
W305S	wt	90	20	0.737506
W305S	wt	90	20	0.741384
W305S	wt	90	20	0.747632
W305S	wt	90	20	0.748836
W305S	wt	90	20	0.752895
W305S	wt	90	20	0.753412
W305S	wt	90	20	0.754368
W305S	wt	90	20	0.767188
W305S	wt	90	20	0.767264
W305S	wt	90	20	0.777059
W305S	wt	90	20	0.778082
W305S	wt	90	20	0.798061
W305S	wt	90	20	0.809268
W305S	wt	90	20	0.817029
W305S	wt	90	20	0.820311
W305S	wt	90	20	0.821331
W305S	wt	90	20	0.825291
W305S	wt	90	20	0.825735
W305S	wt	90	20	0.832789
W305S	wt	90	20	0.844497
W305S	wt	90	20	0.845752
W305S	wt	90	20	0.852818
W305S	wt	90	20	0.853665
W305S	wt	90	20	0.871497
W305S	wt	90	20	0.885729
W305S	wt	90	20	0.898137
W305S	wt	90	20	0.901788
W305S	wt	90	20	0.903066
W305S	wt	90	20	0.909086
W305S	wt	90	20	0.913601
W305S	wt	90	20	0.923981
W305S	wt	90	20	0.929643
W305S	wt	90	20	0.932765
W305S	wt	90	20	0.938676
W305S	wt	90	20	0.950762
W305S	wt	90	20	0.953251
W305S	wt	90	20	0.954232
W305S	wt	90	20	0.964894
W305S	wt	90	20	0.988408
W305S	wt	90	20	1.00463
W305S	wt	90	20	1.05315
W305S	wt	90	20	1.07279
W305S	wt	90	20	1.37532
W305S	wt	90	28	0.277121
W305S	wt	90	28	0.426513
W305S	wt	90	28	0.446306
W305S	wt	90	28	0.522627
W305S	wt	90	28	0.556752
W305S	wt	90	28	0.567228
W305S	wt	90	28	0.58671
W305S	wt	90	28	0.595079
W305S	wt	90	28	0.596348
W305S	wt	90	28	0.604492
W305S	wt	90	28	0.615637
W305S	wt	90	28	0.617448
W305S	wt	90	28	0.624902
W305S	wt	90	28	0.627675
W305S	wt	90	28	0.628672
W305S	wt	90	28	0.633186
W305S	wt	90	28	0.641577
W305S	wt	90	28	0.642001
W305S	wt	90	28	0.642907
W305S	wt	90	28	0.652098
W305S	wt	90	28	0.659323
W305S	wt	90	28	0.667138
W305S	wt	90	28	0.6723
W305S	wt	90	28	0.685132
W305S	wt	90	28	0.687235
W305S	wt	90	28	0.699484
W305S	wt	90	28	0.700714
W305S	wt	90	28	0.703461
W305S	wt	90	28	0.70405
W305S	wt	90	28	0.708713
W305S	wt	90	28	0.708943
W305S	wt	90	28	0.709488
W305S	wt	90	28	0.720155
W305S	wt	90	28	0.732298
W305S	wt	90	28	0.732825
W305S	wt	90	28	0.734752
W305S	wt	90	28	0.737796
W305S	wt	90	28	0.739607
W305S	wt	90	28	0.740984
W305S	wt	90	28	0.742234
W305S	wt	90	28	0.74429
W305S	wt	90	28	0.748344
W305S	wt	90	28	0.752594
W305S	wt	90	28	0.753517
W305S	wt	90	28	0.766789
W305S	wt	90	28	0.782323
W305S	wt	90	28	0.784366
W305S	wt	90	28	0.785858
W305S	wt	90	28	0.7896
W305S	wt	90	28	0.798026
W305S	wt	90	28	0.80439
W305S	wt	90	28	0.805831
W305S	wt	90	28	0.807379
W305S	wt	90	28	0.814167
W305S	wt	90	28	0.818174
W305S	wt	90	28	0.823365
W305S	wt	90	28	0.823953
W305S	wt	90	28	0.823996
W305S	wt	90	28	0.824882
W305S	wt	90	28	0.833058
W305S	wt	90	28	0.834658
W305S	wt	90	28	0.838053
W305S	wt	90	28	0.841913
W305S	wt	90	28	0.849517
W305S	wt	90	28	0.853919
W305S	wt	90	28	0.861933
W305S	wt	90	28	0.875338
W305S	wt	90	28	0.881825
W305S	wt	90	28	0.884932
W305S	wt	90	28	0.892166
W305S	wt	90	28	0.90194
W305S	wt	90	28	0.91719
W305S	wt	90	28	0.922523
W305S	wt	90	28	0.933618
W305S	wt	90	28	0.946879
W305S	wt	90	28	0.950288
W305S	wt	90	28	0.953622
W305S	wt	90	28	0.968368
W305S	wt	90	28	0.968988
W305S	wt	90	28	0.977026
W305S	wt	90	28	0.978777
W305S	wt	90	28	0.990462
W305S	wt	90	28	1.00157
W305S	wt	90	28	1.00254
W305S	wt	90	28	1.01139
W305S	wt	90	28	1.03182
W305S	wt	90	28	1.04532
W305S	wt	90	28	1.0497
W305S	wt	90	28	1.0616
W305S	wt	90	28	1.0848
W305S	wt	90	28	0.282897
W305S	wt	90	28	0.302505
W305S	wt	90	28	0.481642
W305S	wt	90	28	0.483412
W305S	wt	90	28	0.513828
W305S	wt	90	28	0.546473
W305S	wt	90	28	0.553724
W305S	wt	90	28	0.558485
W305S	wt	90	28	0.570878
W305S	wt	90	28	0.586221
W305S	wt	90	28	0.594371
W305S	wt	90	28	0.595255
W305S	wt	90	28	0.597493
W305S	wt	90	28	0.612019
W305S	wt	90	28	0.614668
W305S	wt	90	28	0.627682
W305S	wt	90	28	0.628525
W305S	wt	90	28	0.632857
W305S	wt	90	28	0.639486
W305S	wt	90	28	0.6515
W305S	wt	90	28	0.662579
W305S	wt	90	28	0.666325
W305S	wt	90	28	0.667891
W305S	wt	90	28	0.67257
W305S	wt	90	28	0.675563
W305S	wt	90	28	0.676514
W305S	wt	90	28	0.681084
W305S	wt	90	28	0.683165
W305S	wt	90	28	0.683357
W305S	wt	90	28	0.68683
W305S	wt	90	28	0.688066
W305S	wt	90	28	0.690768
W305S	wt	90	28	0.693208
W305S	wt	90	28	0.697137
W305S	wt	90	28	0.699438
W305S	wt	90	28	0.701978
W305S	wt	90	28	0.70427
W305S	wt	90	28	0.704507
W305S	wt	90	28	0.709475
W305S	wt	90	28	0.712258
W305S	wt	90	28	0.713189
W305S	wt	90	28	0.714748
W305S	wt	90	28	0.730331
W305S	wt	90	28	0.734134
W305S	wt	90	28	0.734892
W305S	wt	90	28	0.735048
W305S	wt	90	28	0.737386
W305S	wt	90	28	0.740367
W305S	wt	90	28	0.757628
W305S	wt	90	28	0.766005
W305S	wt	90	28	0.769247
W305S	wt	90	28	0.772941
W305S	wt	90	28	0.774606
W305S	wt	90	28	0.787263
W305S	wt	90	28	0.788389
W305S	wt	90	28	0.792619
W305S	wt	90	28	0.793516
W305S	wt	90	28	0.795062
W305S	wt	90	28	0.799362
W305S	wt	90	28	0.802923
W305S	wt	90	28	0.806272
W305S	wt	90	28	0.81113
W305S	wt	90	28	0.81147
W305S	wt	90	28	0.816189
W305S	wt	90	28	0.824067
W305S	wt	90	28	0.829527
W305S	wt	90	28	0.846293
W305S	wt	90	28	0.846741
W305S	wt	90	28	0.855617
W305S	wt	90	28	0.86187
W305S	wt	90	28	0.882902
W305S	wt	90	28	0.892505
W305S	wt	90	28	0.895386
W305S	wt	90	28	0.904175
W305S	wt	90	28	0.90551
W305S	wt	90	28	0.908557
W305S	wt	90	28	0.910501
W305S	wt	90	28	0.926221
W305S	wt	90	28	0.928182
W305S	wt	90	28	0.9312
W305S	wt	90	28	0.936882
W305S	wt	90	28	0.936884
W305S	wt	90	28	0.938821
W305S	wt	90	28	0.943882
W305S	wt	90	28	0.946554
W305S	wt	90	28	0.951271
W305S	wt	90	28	0.959283
W305S	wt	90	28	0.95932
W305S	wt	90	28	0.963136
W305S	wt	90	28	0.975534
W305S	wt	90	28	0.97815
W305S	wt	90	28	0.978558
W305S	wt	90	28	0.978566
W305S	wt	90	28	0.982774
W305S	wt	90	28	0.984836
W305S	wt	90	28	0.992173
W305S	wt	90	28	0.993268
W305S	wt	90	28	0.994249
W305S	wt	90	28	1.01429
W305S	wt	90	28	1.01854
W305S	wt	90	28	1.03394
W305S	wt	90	28	1.12149
W305S	wt	90	28	0.490966
W305S	wt	90	28	0.490975
W305S	wt	90	28	0.491398
W305S	wt	90	28	0.495873
W305S	wt	90	28	0.509964
W305S	wt	90	28	0.531961
W305S	wt	90	28	0.534542
W305S	wt	90	28	0.556627
W305S	wt	90	28	0.559114
W305S	wt	90	28	0.561226
W305S	wt	90	28	0.561996
W305S	wt	90	28	0.564954
W305S	wt	90	28	0.577104
W305S	wt	90	28	0.579964
W305S	wt	90	28	0.58068
W305S	wt	90	28	0.581377
W305S	wt	90	28	0.588483
W305S	wt	90	28	0.590682
W305S	wt	90	28	0.591242
W305S	wt	90	28	0.596463
W305S	wt	90	28	0.597573
W305S	wt	90	28	0.601867
W305S	wt	90	28	0.61429
W305S	wt	90	28	0.623691
W305S	wt	90	28	0.625433
W305S	wt	90	28	0.628076
W305S	wt	90	28	0.633709
W305S	wt	90	28	0.641062
W305S	wt	90	28	0.64751
W305S	wt	90	28	0.648188
W305S	wt	90	28	0.657172
W305S	wt	90	28	0.657638
W305S	wt	90	28	0.666684
W305S	wt	90	28	0.678634
W305S	wt	90	28	0.683336
W305S	wt	90	28	0.689431
W305S	wt	90	28	0.701882
W305S	wt	90	28	0.70585
W305S	wt	90	28	0.706105
W305S	wt	90	28	0.710077
W305S	wt	90	28	0.711133
W305S	wt	90	28	0.714575
W305S	wt	90	28	0.731149
W305S	wt	90	28	0.733281
W305S	wt	90	28	0.737849
W305S	wt	90	28	0.749704
W305S	wt	90	28	0.750004
W305S	wt	90	28	0.753215
W305S	wt	90	28	0.759861
W305S	wt	90	28	0.760887
W305S	wt	90	28	0.760897
W305S	wt	90	28	0.761856
W305S	wt	90	28	0.763572
W305S	wt	90	28	0.78071
W305S	wt	90	28	0.781872
W305S	wt	90	28	0.782787
W305S	wt	90	28	0.78824
W305S	wt	90	28	0.799679
W305S	wt	90	28	0.803987
W305S	wt	90	28	0.807088
W305S	wt	90	28	0.81016
W305S	wt	90	28	0.828239
W305S	wt	90	28	0.833316
W305S	wt	90	28	0.833323
W305S	wt	90	28	0.838542
W305S	wt	90	28	0.853325
W305S	wt	90	28	0.859221
W305S	wt	90	28	0.863856
W305S	wt	90	28	0.865926
W305S	wt	90	28	0.868175
W305S	wt	90	28	0.869539
W305S	wt	90	28	0.874413
W305S	wt	90	28	0.883951
W305S	wt	90	28	0.88412
W305S	wt	90	28	0.891093
W305S	wt	90	28	0.89369
W305S	wt	90	28	0.912712
W305S	wt	90	28	0.912718
W305S	wt	90	28	0.92232
W305S	wt	90	28	0.931188
W305S	wt	90	28	0.93273
W305S	wt	90	28	0.934644
W305S	wt	90	28	0.936965
W305S	wt	90	28	0.945589
W305S	wt	90	28	0.94658
W305S	wt	90	28	0.956342
W305S	wt	90	28	0.956342
W305S	wt	90	28	0.980601
W305S	wt	90	28	0.9815
W305S	wt	90	28	0.982672
W305S	wt	90	28	0.982792
W305S	wt	90	28	0.982949
W305S	wt	90	28	0.993795
W305S	wt	90	28	0.995852
W305S	wt	90	28	1.00214
W305S	wt	90	28	1.01311
W305S	wt	90	28	1.02731
W305S	wt	90	28	1.03765
W305S	wt	90	28	1.0569
W305S	wt	90	28	1.11342
W305S	wt	90	28	1.22473
W305S	wt	90	28	1.25462
W305S	dom13	90	20	0.211371
W305S	dom13	90	20	0.4627
W305S	dom13	90	20	0.478256
W305S	dom13	90	20	0.49694
W305S	dom13	90	20	0.513737
W305S	dom13	90	20	0.554638
W305S	dom13	90	20	0.591006
W305S	dom13	90	20	0.596924
W305S	dom13	90	20	0.649717
W305S	dom13	90	20	0.658548
W305S	dom13	90	20	0.66086
W305S	dom13	90	20	0.680608
W305S	dom13	90	20	0.712225
W305S	dom13	90	20	0.723974
W305S	dom13	90	20	0.81583
W305S	dom13	90	20	0.839773
W305S	dom13	90	20	0.880121
W305S	dom13	90	20	1.02395
W305S	dom13	90	20	0.467928
W305S	dom13	90	20	0.468087
W305S	dom13	90	20	0.470324
W305S	dom13	90	20	0.528869
W305S	dom13	90	20	0.53831
W305S	dom13	90	20	0.585276
W305S	dom13	90	20	0.597991
W305S	dom13	90	20	0.611169
W305S	dom13	90	20	0.612619
W305S	dom13	90	20	0.634025
W305S	dom13	90	20	0.635637
W305S	dom13	90	20	0.639268
W305S	dom13	90	20	0.645098
W305S	dom13	90	20	0.654787
W305S	dom13	90	20	0.681009
W305S	dom13	90	20	0.687088
W305S	dom13	90	20	0.690115
W305S	dom13	90	20	0.694933
W305S	dom13	90	20	0.695223
W305S	dom13	90	20	0.70688
W305S	dom13	90	20	0.711278
W305S	dom13	90	20	0.717643
W305S	dom13	90	20	0.736122
W305S	dom13	90	20	0.737773
W305S	dom13	90	20	0.753948
W305S	dom13	90	20	0.757538
W305S	dom13	90	20	0.770679
W305S	dom13	90	20	0.775206
W305S	dom13	90	20	0.82051
W305S	dom13	90	20	0.821563
W305S	dom13	90	20	0.858032
W305S	dom13	90	20	0.872643
W305S	dom13	90	20	0.920407
W305S	dom13	90	20	0.946659
W305S	dom13	90	20	1.02672
W305S	dom13	90	20	1.09183
W305S	dom13	90	20	1.12153
W305S	dom13	90	20	1.14036
W305S	dom13	90	20	0.375174
W305S	dom13	90	20	0.401262
W305S	dom13	90	20	0.519344
W305S	dom13	90	20	0.596881
W305S	dom13	90	20	0.600243
W305S	dom13	90	20	0.621271
W305S	dom13	90	20	0.622469
W305S	dom13	90	20	0.630017
W305S	dom13	90	20	0.635405
W305S	dom13	90	20	0.638076
W305S	dom13	90	20	0.723286
W305S	dom13	90	20	0.794548
W305S	dom13	90	20	0.837605
W305S	dom13	90	20	0.980144
W305S	dom13	90	20	0.27664
W305S	dom13	90	20	0.360056
W305S	dom13	90	20	0.383567
W305S	dom13	90	20	0.423568
W305S	dom13	90	20	0.440481
W305S	dom13	90	20	0.448331
W305S	dom13	90	20	0.522437
W305S	dom13	90	20	0.532433
W305S	dom13	90	20	0.538841
W305S	dom13	90	20	0.558236
W305S	dom13	90	20	0.561425
W305S	dom13	90	20	0.585154
W305S	dom13	90	20	0.58699
W305S	dom13	90	20	0.589779
W305S	dom13	90	20	0.589887
W305S	dom13	90	20	0.594925
W305S	dom13	90	20	0.597128
W305S	dom13	90	20	0.616912
W305S	dom13	90	20	0.63299
W305S	dom13	90	20	0.663159
W305S	dom13	90	20	0.663839
W305S	dom13	90	20	0.670039
W305S	dom13	90	20	0.687424
W305S	dom13	90	20	0.6928
W305S	dom13	90	20	0.704689
W305S	dom13	90	20	0.714374
W305S	dom13	90	20	0.720447
W305S	dom13	90	20	0.724866
W305S	dom13	90	20	0.728226
W305S	dom13	90	20	0.734977
W305S	dom13	90	20	0.74292
W305S	dom13	90	20	0.748774
W305S	dom13	90	20	0.756058
W305S	dom13	90	20	0.783818
W305S	dom13	90	20	0.80452
W305S	dom13	90	20	0.80762
W305S	dom13	90	20	0.820336
W305S	dom13	90	20	0.821917
W305S	dom13	90	20	0.822587
W305S	dom13	90	20	0.845482
W305S	dom13	90	20	0.847097
W305S	dom13	90	20	0.864942
W305S	dom13	90	20	0.86851
W305S	dom13	90	20	0.890339
W305S	dom13	90	20	1.02305
W305S	dom13	90	20	1.1119
W305S	dom13	90	20	0.272185
W305S	dom13	90	20	0.317896
W305S	dom13	90	20	0.383314
W305S	dom13	90	20	0.41653
W305S	dom13	90	20	0.468686
W305S	dom13	90	20	0.476416
W305S	dom13	90	20	0.485032
W305S	dom13	90	20	0.489252
W305S	dom13	90	20	0.494999
W305S	dom13	90	20	0.548929
W305S	dom13	90	20	0.562023
W305S	dom13	90	20	0.562986
W305S	dom13	90	20	0.576714
W305S	dom13	90	20	0.580892
W305S	dom13	90	20	0.591122
W305S	dom13	90	20	0.593895
W305S	dom13	90	20	0.600765
W305S	dom13	90	20	0.614119
W305S	dom13	90	20	0.614883
W305S	dom13	90	20	0.618813
W305S	dom13	90	20	0.619738
W305S	dom13	90	20	0.648943
W305S	dom13	90	20	0.660727
W305S	dom13	90	20	0.664422
W305S	dom13	90	20	0.66565
W305S	dom13	90	20	0.667444
W305S	dom13	90	20	0.672541
W305S	dom13	90	20	0.674582
W305S	dom13	90	20	0.680232
W305S	dom13	90	20	0.688918
W305S	dom13	90	20	0.702135
W305S	dom13	90	20	0.712589
W305S	dom13	90	20	0.725122
W305S	dom13	90	20	0.726841
W305S	dom13	90	20	0.77329
W305S	dom13	90	20	0.785006
W305S	dom13	90	20	0.796719
W305S	dom13	90	20	0.797797
W305S	dom13	90	20	0.814796
W305S	dom13	90	20	0.828006
W305S	dom13	90	20	0.839726
W305S	dom13	90	20	0.840304
W305S	dom13	90	20	0.841141
W305S	dom13	90	20	0.841355
W305S	dom13	90	20	0.875659
W305S	dom13	90	20	0.88442
W305S	dom13	90	20	0.89098
W305S	dom13	90	20	0.897035
W305S	dom13	90	20	0.899422
W305S	dom13	90	20	0.902567
W305S	dom13	90	20	0.906032
W305S	dom13	90	20	0.913817
W305S	dom13	90	20	0.950229
W305S	dom13	90	20	0.950233
W305S	dom13	90	20	0.961073
W305S	dom13	90	20	0.973148
W305S	dom13	90	20	0.981192
W305S	dom13	90	20	1.04565
W305S	dom13	90	20	1.09541
W305S	dom13	90	20	1.11111
W305S	dom13	90	20	1.39628
W305S	dom13	90	20	0.406949
W305S	dom13	90	20	0.424079
W305S	dom13	90	20	0.427414
W305S	dom13	90	20	0.471506
W305S	dom13	90	20	0.51057
W305S	dom13	90	20	0.523876
W305S	dom13	90	20	0.616879
W305S	dom13	90	20	0.630166
W305S	dom13	90	20	0.640723
W305S	dom13	90	20	0.64178
W305S	dom13	90	20	0.641894
W305S	dom13	90	20	0.656983
W305S	dom13	90	20	0.666314
W305S	dom13	90	20	0.677037
W305S	dom13	90	20	0.685401
W305S	dom13	90	20	0.735012
W305S	dom13	90	20	0.751605
W305S	dom13	90	20	0.76437
W305S	dom13	90	20	0.769792
W305S	dom13	90	20	0.793625
W305S	dom13	90	20	0.822585
W305S	dom13	90	20	0.828717
W305S	dom13	90	20	0.828958
W305S	dom13	90	20	0.830531
W305S	dom13	90	20	0.843631
W305S	dom13	90	20	0.852406
W305S	dom13	90	20	0.927564
W305S	dom13	90	20	0.994685
W305S	dom13	90	20	1.1261
W305S	dom13	90	20	1.34541
W305S	dom13	90	20	1.8555
W305S	dom13	90	28	0.227196
W305S	dom13	90	28	0.50791
W305S	dom13	90	28	0.572716
W305S	dom13	90	28	0.631081
W305S	dom13	90	28	0.661324
W305S	dom13	90	28	0.663015
W305S	dom13	90	28	0.667628
W305S	dom13	90	28	0.680871
W305S	dom13	90	28	0.682305
W305S	dom13	90	28	0.726639
W305S	dom13	90	28	0.74907
W305S	dom13	90	28	0.75455
W305S	dom13	90	28	0.774728
W305S	dom13	90	28	0.774876
W305S	dom13	90	28	0.804357
W305S	dom13	90	28	0.80593
W305S	dom13	90	28	0.846097
W305S	dom13	90	28	0.849982
W305S	dom13	90	28	0.882996
W305S	dom13	90	28	0.884453
W305S	dom13	90	28	0.89153
W305S	dom13	90	28	0.938671
W305S	dom13	90	28	1.03171
W305S	dom13	90	28	1.05629
W305S	dom13	90	28	1.15331
W305S	dom13	90	28	0.631645
W305S	dom13	90	28	0.651495
W305S	dom13	90	28	0.654966
W305S	dom13	90	28	0.658661
W305S	dom13	90	28	0.689029
W305S	dom13	90	28	0.703722
W305S	dom13	90	28	0.717384
W305S	dom13	90	28	0.720127
W305S	dom13	90	28	0.731228
W305S	dom13	90	28	0.735917
W305S	dom13	90	28	0.755212
W305S	dom13	90	28	0.766515
W305S	dom13	90	28	0.773776
W305S	dom13	90	28	0.778
W305S	dom13	90	28	0.796173
W305S	dom13	90	28	0.799996
W305S	dom13	90	28	0.800881
W305S	dom13	90	28	0.810467
W305S	dom13	90	28	0.81164
W305S	dom13	90	28	0.821951
W305S	dom13	90	28	0.834907
W305S	dom13	90	28	0.848054
W305S	dom13	90	28	0.858356
W305S	dom13	90	28	0.878101
W305S	dom13	90	28	0.879
W305S	dom13	90	28	0.923656
W305S	dom13	90	28	0.948612
W305S	dom13	90	28	0.951559
W305S	dom13	90	28	0.96221
W305S	dom13	90	28	1
W305S	dom13	90	28	1.00417
W305S	dom13	90	28	1.02675
W305S	dom13	90	28	1.04471
W305S	dom13	90	28	1.32444
W305S	dom13	90	28	0.667137
W305S	dom13	90	28	0.677014
W305S	dom13	90	28	0.714554
W305S	dom13	90	28	0.741022
W305S	dom13	90	28	0.754114
W305S	dom13	90	28	0.758546
W305S	dom13	90	28	0.784333
W305S	dom13	90	28	0.843222
W305S	dom13	90	28	0.867797
W305S	dom13	90	28	0.887009
W305S	dom13	90	28	0.887065
W305S	dom13	90	28	0.894648
W305S	dom13	90	28	0.908261
W305S	dom13	90	28	0.935039
W305S	dom13	90	28	0.955571
W305S	dom13	90	28	0.984456
W305S	dom13	90	28	1.00605
W305S	dom13	90	28	1.06878
W305S	dom13	90	28	1.0769
W305S	dom13	90	28	2.09257
W305S	dom13	90	28	0.533343
W305S	dom13	90	28	0.543719
W305S	dom13	90	28	0.551415
W305S	dom13	90	28	0.552832
W305S	dom13	90	28	0.557763
W305S	dom13	90	28	0.558687
W305S	dom13	90	28	0.559331
W305S	dom13	90	28	0.608027
W305S	dom13	90	28	0.625236
W305S	dom13	90	28	0.653521
W305S	dom13	90	28	0.679296
W305S	dom13	90	28	0.67983
W305S	dom13	90	28	0.688268
W305S	dom13	90	28	0.691525
W305S	dom13	90	28	0.701148
W305S	dom13	90	28	0.70398
W305S	dom13	90	28	0.704319
W305S	dom13	90	28	0.704838
W305S	dom13	90	28	0.709516
W305S	dom13	90	28	0.712048
W305S	dom13	90	28	0.727561
W305S	dom13	90	28	0.736705
W305S	dom13	90	28	0.738675
W305S	dom13	90	28	0.739217
W305S	dom13	90	28	0.746759
W305S	dom13	90	28	0.758587
W305S	dom13	90	28	0.770176
W305S	dom13	90	28	0.783503
W305S	dom13	90	28	0.785399
W305S	dom13	90	28	0.788088
W305S	dom13	90	28	0.792876
W305S	dom13	90	28	0.7972
W305S	dom13	90	28	0.800512
W305S	dom13	90	28	0.803016
W305S	dom13	90	28	0.808459
W305S	dom13	90	28	0.815154
W305S	dom13	90	28	0.843285
W305S	dom13	90	28	0.85353
W305S	dom13	90	28	0.862607
W305S	dom13	90	28	0.873521
W305S	dom13	90	28	0.878578
W305S	dom13	90	28	0.883249
W305S	dom13	90	28	0.886471
W305S	dom13	90	28	0.896039
W305S	dom13	90	28	0.916671
W305S	dom13	90	28	0.916999
W305S	dom13	90	28	0.922782
W305S	dom13	90	28	0.92581
W305S	dom13	90	28	0.955807
W305S	dom13	90	28	0.956797
W305S	dom13	90	28	0.960306
W305S	dom13	90	28	0.984561
W305S	dom13	90	28	1.00173
W305S	dom13	90	28	1.02261
W305S	dom13	90	28	1.03588
W305S	dom13	90	28	1.03588
W305S	dom13	90	28	1.07791
W305S	dom13	90	28	1.24691
W305S	dom13	90	28	0.293495
W305S	dom13	90	28	0.388811
W305S	dom13	90	28	0.405512
W305S	dom13	90	28	0.467922
W305S	dom13	90	28	0.527775
W305S	dom13	90	28	0.528152
W305S	dom13	90	28	0.556166
W305S	dom13	90	28	0.602993
W305S	dom13	90	28	0.630591
W305S	dom13	90	28	0.633791
W305S	dom13	90	28	0.63405
W305S	dom13	90	28	0.657956
W305S	dom13	90	28	0.666667
W305S	dom13	90	28	0.689472
W305S	dom13	90	28	0.740997
W305S	dom13	90	28	0.76748
W305S	dom13	90	28	0.783572
W305S	dom13	90	28	0.792387
W305S	dom13	90	28	0.792848
W305S	dom13	90	28	0.793055
W305S	dom13	90	28	0.79725
W305S	dom13	90	28	0.814273
W305S	dom13	90	28	0.835799
W305S	dom13	90	28	0.840408
W305S	dom13	90	28	0.854596
W305S	dom13	90	28	0.863793
W305S	dom13	90	28	0.874053
W305S	dom13	90	28	0.883814
W305S	dom13	90	28	0.900837
W305S	dom13	90	28	0.937303
W305S	dom13	90	28	0.938207
W305S	dom13	90	28	0.950784
W305S	dom13	90	28	0.959647
W305S	dom13	90	28	0.966534
W305S	dom13	90	28	0.972917
W305S	dom13	90	28	0.996141
W305S	dom13	90	28	1.01287
W305S	dom13	90	28	1.0196
W305S	dom13	90	28	1.03696
W305S	dom13	90	28	1.05913
W305S	dom13	90	28	1.07527
W305S	dom13	90	28	1.13195
W305S	dom13	90	28	1.26614
W305S	dom13	90	28	0.405683
W305S	dom13	90	28	0.429145
W305S	dom13	90	28	0.552966
W305S	dom13	90	28	0.61305
W305S	dom13	90	28	0.631144
W305S	dom13	90	28	0.636733
W305S	dom13	90	28	0.641774
W305S	dom13	90	28	0.671876
W305S	dom13	90	28	0.721901
W305S	dom13	90	28	0.726132
W305S	dom13	90	28	0.751363
W305S	dom13	90	28	0.761012
W305S	dom13	90	28	0.761644
W305S	dom13	90	28	0.766552
W305S	dom13	90	28	0.779622
W305S	dom13	90	28	0.805393
W305S	dom13	90	28	0.832416
W305S	dom13	90	28	0.843336
W305S	dom13	90	28	0.845015
W305S	dom13	90	28	0.879858
W305S	dom13	90	28	0.912858
W305S	dom13	90	28	0.953412
W305S	dom13	90	28	0.96996
W305S	dom13	90	28	1.00429
W305S	dom13	90	28	1.11837
W305S	dom13	90	28	1.12935
Raw data Calbindin
CMK-1 transgene	Calbindin transgene	Time (min)	Temperature (°C)	Ratio
CMK-1(wt)	Ctrl	90	20	0.100376
CMK-1(wt)	Ctrl	90	20	0.120528
CMK-1(wt)	Ctrl	90	20	0.170932
CMK-1(wt)	Ctrl	90	20	0.200698
CMK-1(wt)	Ctrl	90	20	0.215178
CMK-1(wt)	Ctrl	90	20	0.330738
CMK-1(wt)	Ctrl	90	20	0.362458
CMK-1(wt)	Ctrl	90	20	0.388173
CMK-1(wt)	Ctrl	90	20	0.39289
CMK-1(wt)	Ctrl	90	20	0.393984
CMK-1(wt)	Ctrl	90	20	0.422515
CMK-1(wt)	Ctrl	90	20	0.430521
CMK-1(wt)	Ctrl	90	20	0.436843
CMK-1(wt)	Ctrl	90	20	0.443274
CMK-1(wt)	Ctrl	90	20	0.456328
CMK-1(wt)	Ctrl	90	20	0.459599
CMK-1(wt)	Ctrl	90	20	0.46352
CMK-1(wt)	Ctrl	90	20	0.466252
CMK-1(wt)	Ctrl	90	20	0.469848
CMK-1(wt)	Ctrl	90	20	0.487562
CMK-1(wt)	Ctrl	90	20	0.501742
CMK-1(wt)	Ctrl	90	20	0.502785
CMK-1(wt)	Ctrl	90	20	0.505893
CMK-1(wt)	Ctrl	90	20	0.512464
CMK-1(wt)	Ctrl	90	20	0.512973
CMK-1(wt)	Ctrl	90	20	0.513479
CMK-1(wt)	Ctrl	90	20	0.516174
CMK-1(wt)	Ctrl	90	20	0.520847
CMK-1(wt)	Ctrl	90	20	0.532778
CMK-1(wt)	Ctrl	90	20	0.534619
CMK-1(wt)	Ctrl	90	20	0.539342
CMK-1(wt)	Ctrl	90	20	0.541824
CMK-1(wt)	Ctrl	90	20	0.543789
CMK-1(wt)	Ctrl	90	20	0.548174
CMK-1(wt)	Ctrl	90	20	0.548435
CMK-1(wt)	Ctrl	90	20	0.55073
CMK-1(wt)	Ctrl	90	20	0.550747
CMK-1(wt)	Ctrl	90	20	0.5531
CMK-1(wt)	Ctrl	90	20	0.55366
CMK-1(wt)	Ctrl	90	20	0.555064
CMK-1(wt)	Ctrl	90	20	0.563442
CMK-1(wt)	Ctrl	90	20	0.5692
CMK-1(wt)	Ctrl	90	20	0.571974
CMK-1(wt)	Ctrl	90	20	0.577062
CMK-1(wt)	Ctrl	90	20	0.579848
CMK-1(wt)	Ctrl	90	20	0.582476
CMK-1(wt)	Ctrl	90	20	0.58297
CMK-1(wt)	Ctrl	90	20	0.5838
CMK-1(wt)	Ctrl	90	20	0.586412
CMK-1(wt)	Ctrl	90	20	0.590132
CMK-1(wt)	Ctrl	90	20	0.591814
CMK-1(wt)	Ctrl	90	20	0.5927
CMK-1(wt)	Ctrl	90	20	0.593508
CMK-1(wt)	Ctrl	90	20	0.600976
CMK-1(wt)	Ctrl	90	20	0.603446
CMK-1(wt)	Ctrl	90	20	0.603909
CMK-1(wt)	Ctrl	90	20	0.605552
CMK-1(wt)	Ctrl	90	20	0.607057
CMK-1(wt)	Ctrl	90	20	0.608573
CMK-1(wt)	Ctrl	90	20	0.608783
CMK-1(wt)	Ctrl	90	20	0.610974
CMK-1(wt)	Ctrl	90	20	0.611141
CMK-1(wt)	Ctrl	90	20	0.611894
CMK-1(wt)	Ctrl	90	20	0.615916
CMK-1(wt)	Ctrl	90	20	0.619313
CMK-1(wt)	Ctrl	90	20	0.621284
[truncated: 3,247 more rows]
