# Supplementary material for: Ca2+/CaM binding to CaMKI promotes IMA-3 importin binding and nuclear translocation in sensory neurons to control behavioral adaptation
Source: eLife. 2021 Nov 12;10:e71443. doi: 10.7554/eLife.71443 (PMC8635976; doi:10.7554/eLife.71443)
Supplement: Figure 3—source data 1. [file elife-71443-fig3-data1.xlsx]

## Sheet: Figure 3-source data
Summary statistics reported in the main figure
CMK-1 transgene	Genotype	Time (min)	Temperature (°C)	Mean ratio	SEM ratio
CMK-1(wt)	wt	90	20	0.744428	0.0124908
CMK-1(V292A/V294A)	wt	90	20	1.08606	0.0187468
CMK-1(W305S)	wt	90	20	0.680614	0.0104834
CMK-1(V292A/V294A/W305S)	wt	90	20	0.829591	0.0125134
CMK-1(wt)	wt	90	28	1.06469	0.0160771
CMK-1(V292A/V294A)	wt	90	28	1.06805	0.0168017
CMK-1(W305S)	wt	90	28	0.764436	0.0098437
CMK-1(V292A/V294A/W305S)	wt	90	28	0.770293	0.0111568
CMK-1(V292A/V294A)	wt	90	20	1.08606	0.0187468
CMK-1(K71A/R74Q/R77S)	wt	90	20	0.721552	0.00954859
CMK-1(K71A/R74Q/R77S/ V292A/V294A)	wt	90	20	1.04164	0.0247252
CMK-1(V292A/V294A)	wt	90	28	1.06805	0.0168017
CMK-1(K71A/R74Q/R77S)	wt	90	28	0.682403	0.00988317
CMK-1(K71A/R74Q/R77S/ V292A/V294A)	wt	90	28	0.76624	0.0123127
CMK-1(wt)	unc-68(+)	90	20	0.68468	0.0125418
CMK-1(wt)	unc-68(dom13)	90	20	0.87557	0.0263456
CMK-1(K71A/R74Q/R77S)	unc-68(+)	90	20	0.721552	0.00954859
CMK-1(K71A/R74Q/R77S)	unc-68(dom13)	90	20	0.79339	0.0145599
CMK-1(wt)	unc-68(+)	90	28	1.13096	0.0212858
CMK-1(wt)	unc-68(dom13)	90	28	1.1939	0.0256189
CMK-1(K71A/R74Q/R77S)	unc-68(+)	90	28	0.682403	0.00988317
CMK-1(K71A/R74Q/R77S)	unc-68(dom13)	90	28	0.768849	0.0202044
CMK-1(wt)	unc-68(+)	90	20	0.68468	0.0125418
CMK-1(wt)	unc-68(dom13)	90	20	0.87557	0.0263456
CMK-1(W305S)	unc-68(+)	90	20	0.679512	0.0181187
CMK-1(W305S)	unc-68(dom13)	90	20	0.710194	0.0141677
CMK-1(wt)	unc-68(+)	90	28	1.13096	0.0212858
CMK-1(wt)	unc-68(dom13)	90	28	1.1939	0.0256189
CMK-1(W305S)	unc-68(+)	90	28	0.762109	0.0167411
CMK-1(W305S)	unc-68(dom13)	90	28	0.808504	0.0134969
Raw data interaction between NES and CaM binding mutation
CMK-1 transgene	Genotype	Time (min)	Temperature (°C)	Ratio
W305S	wt	90	20	0.363107
W305S	wt	90	20	0.379444
W305S	wt	90	20	0.390051
W305S	wt	90	20	0.406815
W305S	wt	90	20	0.407038
W305S	wt	90	20	0.415075
W305S	wt	90	20	0.422963
W305S	wt	90	20	0.43935
W305S	wt	90	20	0.446114
W305S	wt	90	20	0.451694
W305S	wt	90	20	0.456271
W305S	wt	90	20	0.457563
W305S	wt	90	20	0.458109
W305S	wt	90	20	0.480482
W305S	wt	90	20	0.48675
W305S	wt	90	20	0.490712
W305S	wt	90	20	0.494347
W305S	wt	90	20	0.503528
W305S	wt	90	20	0.506217
W305S	wt	90	20	0.511697
W305S	wt	90	20	0.517024
W305S	wt	90	20	0.518307
W305S	wt	90	20	0.533475
W305S	wt	90	20	0.534294
W305S	wt	90	20	0.541106
W305S	wt	90	20	0.547966
W305S	wt	90	20	0.551341
W305S	wt	90	20	0.557038
W305S	wt	90	20	0.560542
W305S	wt	90	20	0.562854
W305S	wt	90	20	0.563628
W305S	wt	90	20	0.566037
W305S	wt	90	20	0.570821
W305S	wt	90	20	0.572822
W305S	wt	90	20	0.573333
W305S	wt	90	20	0.574915
W305S	wt	90	20	0.577519
W305S	wt	90	20	0.578924
W305S	wt	90	20	0.587968
W305S	wt	90	20	0.588527
W305S	wt	90	20	0.601412
W305S	wt	90	20	0.603089
W305S	wt	90	20	0.605845
W305S	wt	90	20	0.619266
W305S	wt	90	20	0.624192
W305S	wt	90	20	0.624528
W305S	wt	90	20	0.635645
W305S	wt	90	20	0.635744
W305S	wt	90	20	0.639166
W305S	wt	90	20	0.649711
W305S	wt	90	20	0.651589
W305S	wt	90	20	0.65336
W305S	wt	90	20	0.656983
W305S	wt	90	20	0.660536
W305S	wt	90	20	0.662928
W305S	wt	90	20	0.664894
W305S	wt	90	20	0.670441
W305S	wt	90	20	0.676472
W305S	wt	90	20	0.68383
W305S	wt	90	20	0.68643
W305S	wt	90	20	0.686764
W305S	wt	90	20	0.687951
W305S	wt	90	20	0.692514
W305S	wt	90	20	0.695507
W305S	wt	90	20	0.69865
W305S	wt	90	20	0.701593
W305S	wt	90	20	0.704379
W305S	wt	90	20	0.708281
W305S	wt	90	20	0.712581
W305S	wt	90	20	0.713169
W305S	wt	90	20	0.717888
W305S	wt	90	20	0.72017
W305S	wt	90	20	0.727051
W305S	wt	90	20	0.728581
W305S	wt	90	20	0.732572
W305S	wt	90	20	0.742883
W305S	wt	90	20	0.746167
W305S	wt	90	20	0.746679
W305S	wt	90	20	0.751839
W305S	wt	90	20	0.756673
W305S	wt	90	20	0.763232
W305S	wt	90	20	0.772239
W305S	wt	90	20	0.777214
W305S	wt	90	20	0.77741
W305S	wt	90	20	0.782056
W305S	wt	90	20	0.785545
W305S	wt	90	20	0.805662
W305S	wt	90	20	0.809249
W305S	wt	90	20	0.810988
W305S	wt	90	20	0.813521
W305S	wt	90	20	0.821347
W305S	wt	90	20	0.830342
W305S	wt	90	20	0.831844
W305S	wt	90	20	0.832454
W305S	wt	90	20	0.835569
W305S	wt	90	20	0.851169
W305S	wt	90	20	0.85876
W305S	wt	90	20	0.881713
W305S	wt	90	20	0.882513
W305S	wt	90	20	0.893137
W305S	wt	90	20	0.899811
W305S	wt	90	20	0.905257
W305S	wt	90	20	0.906594
W305S	wt	90	20	0.910578
W305S	wt	90	20	0.911374
W305S	wt	90	20	0.924406
W305S	wt	90	20	0.986868
W305S	wt	90	20	1
W305S	wt	90	20	1.03042
W305S	wt	90	20	1.13326
W305S	wt	90	20	1.15991
W305S	wt	90	20	0.3219
W305S	wt	90	20	0.356249
W305S	wt	90	20	0.387804
W305S	wt	90	20	0.394685
W305S	wt	90	20	0.397615
W305S	wt	90	20	0.416344
W305S	wt	90	20	0.419776
W305S	wt	90	20	0.438539
W305S	wt	90	20	0.45162
W305S	wt	90	20	0.468769
W305S	wt	90	20	0.473047
W305S	wt	90	20	0.479759
W305S	wt	90	20	0.480001
W305S	wt	90	20	0.496771
W305S	wt	90	20	0.512935
W305S	wt	90	20	0.518622
W305S	wt	90	20	0.518938
W305S	wt	90	20	0.519504
W305S	wt	90	20	0.531274
W305S	wt	90	20	0.537124
W305S	wt	90	20	0.538937
W305S	wt	90	20	0.544163
W305S	wt	90	20	0.545906
W305S	wt	90	20	0.551594
W305S	wt	90	20	0.554904
W305S	wt	90	20	0.558044
W305S	wt	90	20	0.560319
W305S	wt	90	20	0.560914
W305S	wt	90	20	0.565177
W305S	wt	90	20	0.572465
W305S	wt	90	20	0.573579
W305S	wt	90	20	0.575276
W305S	wt	90	20	0.578262
W305S	wt	90	20	0.580763
W305S	wt	90	20	0.584229
W305S	wt	90	20	0.58455
W305S	wt	90	20	0.586092
W305S	wt	90	20	0.588959
W305S	wt	90	20	0.593842
W305S	wt	90	20	0.594693
W305S	wt	90	20	0.595184
W305S	wt	90	20	0.596925
W305S	wt	90	20	0.598523
W305S	wt	90	20	0.60595
W305S	wt	90	20	0.607942
W305S	wt	90	20	0.624998
W305S	wt	90	20	0.625884
W305S	wt	90	20	0.631356
W305S	wt	90	20	0.635149
W305S	wt	90	20	0.636576
W305S	wt	90	20	0.637662
W305S	wt	90	20	0.640034
W305S	wt	90	20	0.645965
W305S	wt	90	20	0.648526
W305S	wt	90	20	0.648542
W305S	wt	90	20	0.661213
W305S	wt	90	20	0.66365
W305S	wt	90	20	0.665387
W305S	wt	90	20	0.665807
W305S	wt	90	20	0.672289
W305S	wt	90	20	0.67637
W305S	wt	90	20	0.680214
W305S	wt	90	20	0.682124
W305S	wt	90	20	0.690604
W305S	wt	90	20	0.690922
W305S	wt	90	20	0.691012
W305S	wt	90	20	0.691424
W305S	wt	90	20	0.692678
W305S	wt	90	20	0.702661
W305S	wt	90	20	0.703578
W305S	wt	90	20	0.703832
W305S	wt	90	20	0.709922
W305S	wt	90	20	0.712136
W305S	wt	90	20	0.719446
W305S	wt	90	20	0.720557
W305S	wt	90	20	0.721852
W305S	wt	90	20	0.724435
W305S	wt	90	20	0.726396
W305S	wt	90	20	0.728777
W305S	wt	90	20	0.733615
W305S	wt	90	20	0.73596
W305S	wt	90	20	0.737189
W305S	wt	90	20	0.737739
W305S	wt	90	20	0.738485
W305S	wt	90	20	0.745708
W305S	wt	90	20	0.746143
W305S	wt	90	20	0.74753
W305S	wt	90	20	0.769862
W305S	wt	90	20	0.775558
W305S	wt	90	20	0.775934
W305S	wt	90	20	0.783503
W305S	wt	90	20	0.784726
W305S	wt	90	20	0.78642
W305S	wt	90	20	0.786671
W305S	wt	90	20	0.787056
W305S	wt	90	20	0.79879
W305S	wt	90	20	0.802654
W305S	wt	90	20	0.80522
W305S	wt	90	20	0.814358
W305S	wt	90	20	0.82189
W305S	wt	90	20	0.823143
W305S	wt	90	20	0.828833
W305S	wt	90	20	0.83328
W305S	wt	90	20	0.83399
W305S	wt	90	20	0.842788
W305S	wt	90	20	0.84331
W305S	wt	90	20	0.848074
W305S	wt	90	20	0.850548
W305S	wt	90	20	0.858737
W305S	wt	90	20	0.869588
W305S	wt	90	20	0.882498
W305S	wt	90	20	0.891009
W305S	wt	90	20	0.911429
W305S	wt	90	20	0.922296
W305S	wt	90	20	0.952771
W305S	wt	90	20	0.962777
W305S	wt	90	20	0.990269
W305S	wt	90	20	0.993144
W305S	wt	90	20	0.993144
W305S	wt	90	20	0.99492
W305S	wt	90	20	1.02965
W305S	wt	90	20	1.05162
W305S	wt	90	20	1.0642
W305S	wt	90	20	1.08914
W305S	wt	90	20	1.09557
W305S	wt	90	20	1.12339
W305S	wt	90	20	1.19627
W305S	wt	90	20	1.58346
W305S	wt	90	20	0.180296
W305S	wt	90	20	0.255436
W305S	wt	90	20	0.318205
W305S	wt	90	20	0.328028
W305S	wt	90	20	0.396871
W305S	wt	90	20	0.432346
W305S	wt	90	20	0.456714
W305S	wt	90	20	0.469407
W305S	wt	90	20	0.481237
W305S	wt	90	20	0.489301
W305S	wt	90	20	0.489702
W305S	wt	90	20	0.49804
W305S	wt	90	20	0.50214
W305S	wt	90	20	0.507653
W305S	wt	90	20	0.509538
W305S	wt	90	20	0.511243
W305S	wt	90	20	0.521578
W305S	wt	90	20	0.524803
W305S	wt	90	20	0.530534
W305S	wt	90	20	0.536727
W305S	wt	90	20	0.542672
W305S	wt	90	20	0.546182
W305S	wt	90	20	0.546949
W305S	wt	90	20	0.547088
W305S	wt	90	20	0.547132
W305S	wt	90	20	0.568778
W305S	wt	90	20	0.568953
W305S	wt	90	20	0.584726
W305S	wt	90	20	0.587833
W305S	wt	90	20	0.58965
W305S	wt	90	20	0.605309
W305S	wt	90	20	0.608467
W305S	wt	90	20	0.616691
W305S	wt	90	20	0.6193
W305S	wt	90	20	0.627445
W305S	wt	90	20	0.629747
W305S	wt	90	20	0.630463
W305S	wt	90	20	0.630572
W305S	wt	90	20	0.633596
W305S	wt	90	20	0.63528
W305S	wt	90	20	0.637577
W305S	wt	90	20	0.641012
W305S	wt	90	20	0.641718
W305S	wt	90	20	0.643385
W305S	wt	90	20	0.649298
W305S	wt	90	20	0.650324
W305S	wt	90	20	0.654664
W305S	wt	90	20	0.65853
W305S	wt	90	20	0.661442
W305S	wt	90	20	0.662489
W305S	wt	90	20	0.665477
W305S	wt	90	20	0.667593
W305S	wt	90	20	0.66836
W305S	wt	90	20	0.669908
W305S	wt	90	20	0.67675
W305S	wt	90	20	0.680312
W305S	wt	90	20	0.685
W305S	wt	90	20	0.685106
W305S	wt	90	20	0.696271
W305S	wt	90	20	0.697117
W305S	wt	90	20	0.701486
W305S	wt	90	20	0.702322
W305S	wt	90	20	0.702981
W305S	wt	90	20	0.706425
W305S	wt	90	20	0.723593
W305S	wt	90	20	0.737506
W305S	wt	90	20	0.741384
W305S	wt	90	20	0.747632
W305S	wt	90	20	0.748836
W305S	wt	90	20	0.752895
W305S	wt	90	20	0.753412
W305S	wt	90	20	0.754368
W305S	wt	90	20	0.767188
W305S	wt	90	20	0.767264
W305S	wt	90	20	0.777059
W305S	wt	90	20	0.778082
W305S	wt	90	20	0.798061
W305S	wt	90	20	0.809268
W305S	wt	90	20	0.817029
W305S	wt	90	20	0.820311
W305S	wt	90	20	0.821331
W305S	wt	90	20	0.825291
W305S	wt	90	20	0.825735
W305S	wt	90	20	0.832789
W305S	wt	90	20	0.844497
W305S	wt	90	20	0.845752
W305S	wt	90	20	0.852818
W305S	wt	90	20	0.853665
W305S	wt	90	20	0.871497
W305S	wt	90	20	0.885729
W305S	wt	90	20	0.898137
W305S	wt	90	20	0.901788
W305S	wt	90	20	0.903066
W305S	wt	90	20	0.909086
W305S	wt	90	20	0.913601
W305S	wt	90	20	0.923981
W305S	wt	90	20	0.929643
W305S	wt	90	20	0.932765
W305S	wt	90	20	0.938676
W305S	wt	90	20	0.950762
W305S	wt	90	20	0.953251
W305S	wt	90	20	0.954232
W305S	wt	90	20	0.964894
W305S	wt	90	20	0.988408
W305S	wt	90	20	1.00463
W305S	wt	90	20	1.05315
W305S	wt	90	20	1.07279
W305S	wt	90	20	1.37532
W305S	wt	90	28	0.277121
W305S	wt	90	28	0.426513
W305S	wt	90	28	0.446306
W305S	wt	90	28	0.522627
W305S	wt	90	28	0.556752
W305S	wt	90	28	0.567228
W305S	wt	90	28	0.58671
W305S	wt	90	28	0.595079
W305S	wt	90	28	0.596348
W305S	wt	90	28	0.604492
W305S	wt	90	28	0.615637
W305S	wt	90	28	0.617448
W305S	wt	90	28	0.624902
W305S	wt	90	28	0.627675
W305S	wt	90	28	0.628672
W305S	wt	90	28	0.633186
W305S	wt	90	28	0.641577
W305S	wt	90	28	0.642001
W305S	wt	90	28	0.642907
W305S	wt	90	28	0.652098
W305S	wt	90	28	0.659323
W305S	wt	90	28	0.667138
W305S	wt	90	28	0.6723
W305S	wt	90	28	0.685132
W305S	wt	90	28	0.687235
W305S	wt	90	28	0.699484
W305S	wt	90	28	0.700714
W305S	wt	90	28	0.703461
W305S	wt	90	28	0.70405
W305S	wt	90	28	0.708713
W305S	wt	90	28	0.708943
W305S	wt	90	28	0.709488
W305S	wt	90	28	0.720155
W305S	wt	90	28	0.732298
W305S	wt	90	28	0.732825
W305S	wt	90	28	0.734752
W305S	wt	90	28	0.737796
W305S	wt	90	28	0.739607
W305S	wt	90	28	0.740984
W305S	wt	90	28	0.742234
W305S	wt	90	28	0.74429
W305S	wt	90	28	0.748344
W305S	wt	90	28	0.752594
W305S	wt	90	28	0.753517
W305S	wt	90	28	0.766789
W305S	wt	90	28	0.782323
W305S	wt	90	28	0.784366
W305S	wt	90	28	0.785858
W305S	wt	90	28	0.7896
W305S	wt	90	28	0.798026
W305S	wt	90	28	0.80439
W305S	wt	90	28	0.805831
W305S	wt	90	28	0.807379
W305S	wt	90	28	0.814167
W305S	wt	90	28	0.818174
W305S	wt	90	28	0.823365
W305S	wt	90	28	0.823953
W305S	wt	90	28	0.823996
W305S	wt	90	28	0.824882
W305S	wt	90	28	0.833058
W305S	wt	90	28	0.834658
W305S	wt	90	28	0.838053
W305S	wt	90	28	0.841913
W305S	wt	90	28	0.849517
W305S	wt	90	28	0.853919
W305S	wt	90	28	0.861933
W305S	wt	90	28	0.875338
W305S	wt	90	28	0.881825
W305S	wt	90	28	0.884932
W305S	wt	90	28	0.892166
W305S	wt	90	28	0.90194
W305S	wt	90	28	0.91719
W305S	wt	90	28	0.922523
W305S	wt	90	28	0.933618
W305S	wt	90	28	0.946879
W305S	wt	90	28	0.950288
W305S	wt	90	28	0.953622
W305S	wt	90	28	0.968368
W305S	wt	90	28	0.968988
W305S	wt	90	28	0.977026
W305S	wt	90	28	0.978777
W305S	wt	90	28	0.990462
W305S	wt	90	28	1.00157
W305S	wt	90	28	1.00254
W305S	wt	90	28	1.01139
W305S	wt	90	28	1.03182
W305S	wt	90	28	1.04532
W305S	wt	90	28	1.0497
W305S	wt	90	28	1.0616
W305S	wt	90	28	1.0848
W305S	wt	90	28	0.282897
W305S	wt	90	28	0.302505
W305S	wt	90	28	0.481642
W305S	wt	90	28	0.483412
W305S	wt	90	28	0.513828
W305S	wt	90	28	0.546473
W305S	wt	90	28	0.553724
W305S	wt	90	28	0.558485
W305S	wt	90	28	0.570878
W305S	wt	90	28	0.586221
W305S	wt	90	28	0.594371
W305S	wt	90	28	0.595255
W305S	wt	90	28	0.597493
W305S	wt	90	28	0.612019
W305S	wt	90	28	0.614668
W305S	wt	90	28	0.627682
W305S	wt	90	28	0.628525
W305S	wt	90	28	0.632857
W305S	wt	90	28	0.639486
W305S	wt	90	28	0.6515
W305S	wt	90	28	0.662579
W305S	wt	90	28	0.666325
W305S	wt	90	28	0.667891
W305S	wt	90	28	0.67257
W305S	wt	90	28	0.675563
W305S	wt	90	28	0.676514
W305S	wt	90	28	0.681084
W305S	wt	90	28	0.683165
W305S	wt	90	28	0.683357
W305S	wt	90	28	0.68683
W305S	wt	90	28	0.688066
W305S	wt	90	28	0.690768
W305S	wt	90	28	0.693208
W305S	wt	90	28	0.697137
W305S	wt	90	28	0.699438
W305S	wt	90	28	0.701978
W305S	wt	90	28	0.70427
W305S	wt	90	28	0.704507
W305S	wt	90	28	0.709475
W305S	wt	90	28	0.712258
W305S	wt	90	28	0.713189
W305S	wt	90	28	0.714748
W305S	wt	90	28	0.730331
W305S	wt	90	28	0.734134
W305S	wt	90	28	0.734892
W305S	wt	90	28	0.735048
W305S	wt	90	28	0.737386
W305S	wt	90	28	0.740367
W305S	wt	90	28	0.757628
W305S	wt	90	28	0.766005
W305S	wt	90	28	0.769247
W305S	wt	90	28	0.772941
W305S	wt	90	28	0.774606
W305S	wt	90	28	0.787263
W305S	wt	90	28	0.788389
W305S	wt	90	28	0.792619
W305S	wt	90	28	0.793516
W305S	wt	90	28	0.795062
W305S	wt	90	28	0.799362
W305S	wt	90	28	0.802923
W305S	wt	90	28	0.806272
W305S	wt	90	28	0.81113
W305S	wt	90	28	0.81147
W305S	wt	90	28	0.816189
W305S	wt	90	28	0.824067
W305S	wt	90	28	0.829527
W305S	wt	90	28	0.846293
W305S	wt	90	28	0.846741
W305S	wt	90	28	0.855617
W305S	wt	90	28	0.86187
W305S	wt	90	28	0.882902
W305S	wt	90	28	0.892505
W305S	wt	90	28	0.895386
W305S	wt	90	28	0.904175
W305S	wt	90	28	0.90551
W305S	wt	90	28	0.908557
W305S	wt	90	28	0.910501
W305S	wt	90	28	0.926221
W305S	wt	90	28	0.928182
W305S	wt	90	28	0.9312
W305S	wt	90	28	0.936882
W305S	wt	90	28	0.936884
W305S	wt	90	28	0.938821
W305S	wt	90	28	0.943882
W305S	wt	90	28	0.946554
W305S	wt	90	28	0.951271
W305S	wt	90	28	0.959283
W305S	wt	90	28	0.95932
W305S	wt	90	28	0.963136
W305S	wt	90	28	0.975534
W305S	wt	90	28	0.97815
W305S	wt	90	28	0.978558
W305S	wt	90	28	0.978566
W305S	wt	90	28	0.982774
W305S	wt	90	28	0.984836
W305S	wt	90	28	0.992173
W305S	wt	90	28	0.993268
W305S	wt	90	28	0.994249
W305S	wt	90	28	1.01429
W305S	wt	90	28	1.01854
W305S	wt	90	28	1.03394
W305S	wt	90	28	1.12149
W305S	wt	90	28	0.490966
W305S	wt	90	28	0.490975
W305S	wt	90	28	0.491398
W305S	wt	90	28	0.495873
W305S	wt	90	28	0.509964
W305S	wt	90	28	0.531961
W305S	wt	90	28	0.534542
W305S	wt	90	28	0.556627
W305S	wt	90	28	0.559114
W305S	wt	90	28	0.561226
W305S	wt	90	28	0.561996
W305S	wt	90	28	0.564954
W305S	wt	90	28	0.577104
W305S	wt	90	28	0.579964
W305S	wt	90	28	0.58068
W305S	wt	90	28	0.581377
W305S	wt	90	28	0.588483
W305S	wt	90	28	0.590682
W305S	wt	90	28	0.591242
W305S	wt	90	28	0.596463
W305S	wt	90	28	0.597573
W305S	wt	90	28	0.601867
W305S	wt	90	28	0.61429
W305S	wt	90	28	0.623691
W305S	wt	90	28	0.625433
W305S	wt	90	28	0.628076
W305S	wt	90	28	0.633709
W305S	wt	90	28	0.641062
W305S	wt	90	28	0.64751
W305S	wt	90	28	0.648188
W305S	wt	90	28	0.657172
W305S	wt	90	28	0.657638
W305S	wt	90	28	0.666684
W305S	wt	90	28	0.678634
W305S	wt	90	28	0.683336
W305S	wt	90	28	0.689431
W305S	wt	90	28	0.701882
W305S	wt	90	28	0.70585
W305S	wt	90	28	0.706105
W305S	wt	90	28	0.710077
W305S	wt	90	28	0.711133
W305S	wt	90	28	0.714575
W305S	wt	90	28	0.731149
W305S	wt	90	28	0.733281
W305S	wt	90	28	0.737849
W305S	wt	90	28	0.749704
W305S	wt	90	28	0.750004
W305S	wt	90	28	0.753215
W305S	wt	90	28	0.759861
W305S	wt	90	28	0.760887
W305S	wt	90	28	0.760897
W305S	wt	90	28	0.761856
W305S	wt	90	28	0.763572
W305S	wt	90	28	0.78071
W305S	wt	90	28	0.781872
W305S	wt	90	28	0.782787
W305S	wt	90	28	0.78824
W305S	wt	90	28	0.799679
W305S	wt	90	28	0.803987
W305S	wt	90	28	0.807088
W305S	wt	90	28	0.81016
W305S	wt	90	28	0.828239
W305S	wt	90	28	0.833316
W305S	wt	90	28	0.833323
W305S	wt	90	28	0.838542
W305S	wt	90	28	0.853325
W305S	wt	90	28	0.859221
W305S	wt	90	28	0.863856
W305S	wt	90	28	0.865926
W305S	wt	90	28	0.868175
W305S	wt	90	28	0.869539
W305S	wt	90	28	0.874413
W305S	wt	90	28	0.883951
W305S	wt	90	28	0.88412
W305S	wt	90	28	0.891093
W305S	wt	90	28	0.89369
W305S	wt	90	28	0.912712
W305S	wt	90	28	0.912718
W305S	wt	90	28	0.92232
W305S	wt	90	28	0.931188
W305S	wt	90	28	0.93273
W305S	wt	90	28	0.934644
W305S	wt	90	28	0.936965
W305S	wt	90	28	0.945589
W305S	wt	90	28	0.94658
W305S	wt	90	28	0.956342
W305S	wt	90	28	0.956342
W305S	wt	90	28	0.980601
W305S	wt	90	28	0.9815
W305S	wt	90	28	0.982672
W305S	wt	90	28	0.982792
W305S	wt	90	28	0.982949
W305S	wt	90	28	0.993795
W305S	wt	90	28	0.995852
W305S	wt	90	28	1.00214
W305S	wt	90	28	1.01311
W305S	wt	90	28	1.02731
W305S	wt	90	28	1.03765
W305S	wt	90	28	1.0569
W305S	wt	90	28	1.11342
W305S	wt	90	28	1.22473
W305S	wt	90	28	1.25462
CMK-1(V292A/V294A)	wt	90	20	0.905343
CMK-1(V292A/V294A)	wt	90	20	0.96319
CMK-1(V292A/V294A)	wt	90	20	1.01961
CMK-1(V292A/V294A)	wt	90	20	1.14894
CMK-1(V292A/V294A)	wt	90	20	1.0031
CMK-1(V292A/V294A)	wt	90	20	1.00551
CMK-1(V292A/V294A)	wt	90	20	1.02518
CMK-1(V292A/V294A)	wt	90	20	1.07197
CMK-1(V292A/V294A)	wt	90	20	1.0777
CMK-1(V292A/V294A)	wt	90	20	1.09091
CMK-1(V292A/V294A)	wt	90	20	1.55233
CMK-1(V292A/V294A)	wt	90	20	1.20692
CMK-1(V292A/V294A)	wt	90	20	1.22895
CMK-1(V292A/V294A)	wt	90	20	0.581603
CMK-1(V292A/V294A)	wt	90	20	0.595703
CMK-1(V292A/V294A)	wt	90	20	0.634695
CMK-1(V292A/V294A)	wt	90	20	0.711281
CMK-1(V292A/V294A)	wt	90	20	0.718374
CMK-1(V292A/V294A)	wt	90	20	0.723171
CMK-1(V292A/V294A)	wt	90	20	0.82808
CMK-1(V292A/V294A)	wt	90	20	0.861608
CMK-1(V292A/V294A)	wt	90	20	0.909966
CMK-1(V292A/V294A)	wt	90	20	0.913983
CMK-1(V292A/V294A)	wt	90	20	0.968034
CMK-1(V292A/V294A)	wt	90	20	0.981471
CMK-1(V292A/V294A)	wt	90	20	1.06198
CMK-1(V292A/V294A)	wt	90	20	1.11306
CMK-1(V292A/V294A)	wt	90	20	1.11809
CMK-1(V292A/V294A)	wt	90	20	1.13376
CMK-1(V292A/V294A)	wt	90	20	1.17196
CMK-1(V292A/V294A)	wt	90	20	0.724164
CMK-1(V292A/V294A)	wt	90	20	0.963127
CMK-1(V292A/V294A)	wt	90	20	0.812888
CMK-1(V292A/V294A)	wt	90	20	0.838333
CMK-1(V292A/V294A)	wt	90	20	0.907213
CMK-1(V292A/V294A)	wt	90	20	0.916577
CMK-1(V292A/V294A)	wt	90	20	0.925359
CMK-1(V292A/V294A)	wt	90	20	0.942927
CMK-1(V292A/V294A)	wt	90	20	0.948495
CMK-1(V292A/V294A)	wt	90	20	1.10578
CMK-1(V292A/V294A)	wt	90	20	1.21353
CMK-1(V292A/V294A)	wt	90	20	1.57234
CMK-1(V292A/V294A)	wt	90	20	0.914754
CMK-1(V292A/V294A)	wt	90	20	0.9262
CMK-1(V292A/V294A)	wt	90	20	0.931065
CMK-1(V292A/V294A)	wt	90	20	0.998444
CMK-1(V292A/V294A)	wt	90	20	1.04642
CMK-1(V292A/V294A)	wt	90	20	1.08233
CMK-1(V292A/V294A)	wt	90	20	1.22649
CMK-1(V292A/V294A)	wt	90	20	1.3506
CMK-1(V292A/V294A)	wt	90	20	0.888901
CMK-1(V292A/V294A)	wt	90	20	0.9414
CMK-1(V292A/V294A)	wt	90	20	0.99926
CMK-1(V292A/V294A)	wt	90	20	1.58539
CMK-1(V292A/V294A)	wt	90	20	0.725904
CMK-1(V292A/V294A)	wt	90	20	0.821282
CMK-1(V292A/V294A)	wt	90	20	1
CMK-1(V292A/V294A)	wt	90	20	1.02349
CMK-1(V292A/V294A)	wt	90	20	1.0585
CMK-1(V292A/V294A)	wt	90	20	1.08095
CMK-1(V292A/V294A)	wt	90	20	1.1183
CMK-1(V292A/V294A)	wt	90	20	1.12827
CMK-1(V292A/V294A)	wt	90	20	1.18526
CMK-1(V292A/V294A)	wt	90	20	1.19393
CMK-1(V292A/V294A)	wt	90	20	1.24738
CMK-1(V292A/V294A)	wt	90	20	1.32317
CMK-1(V292A/V294A)	wt	90	20	1.34457
CMK-1(V292A/V294A)	wt	90	20	1.25822
CMK-1(V292A/V294A)	wt	90	20	1.20176
CMK-1(V292A/V294A)	wt	90	20	1.01166
CMK-1(V292A/V294A)	wt	90	20	0.754202
CMK-1(V292A/V294A)	wt	90	20	1.02456
CMK-1(V292A/V294A)	wt	90	20	0.861804
CMK-1(V292A/V294A)	wt	90	20	0.9824
CMK-1(V292A/V294A)	wt	90	20	0.995139
CMK-1(V292A/V294A)	wt	90	20	1.21665
CMK-1(V292A/V294A)	wt	90	20	0.860839
CMK-1(V292A/V294A)	wt	90	20	0.873296
CMK-1(V292A/V294A)	wt	90	20	1.27247
CMK-1(V292A/V294A)	wt	90	20	1.39815
CMK-1(V292A/V294A)	wt	90	20	1.42673
CMK-1(V292A/V294A)	wt	90	20	0.788306
CMK-1(V292A/V294A)	wt	90	20	0.892748
CMK-1(V292A/V294A)	wt	90	20	0.998387
CMK-1(V292A/V294A)	wt	90	20	1.07773
CMK-1(V292A/V294A)	wt	90	20	1.08363
CMK-1(V292A/V294A)	wt	90	20	1.56071
CMK-1(V292A/V294A)	wt	90	20	2.53054
CMK-1(V292A/V294A)	wt	90	20	1.10715
CMK-1(V292A/V294A)	wt	90	20	0.794299
CMK-1(V292A/V294A)	wt	90	20	0.660164
CMK-1(V292A/V294A)	wt	90	20	0.667686
CMK-1(V292A/V294A)	wt	90	20	0.669796
CMK-1(V292A/V294A)	wt	90	20	0.702931
CMK-1(V292A/V294A)	wt	90	20	0.716529
CMK-1(V292A/V294A)	wt	90	20	0.731194
CMK-1(V292A/V294A)	wt	90	20	0.731316
CMK-1(V292A/V294A)	wt	90	20	0.739982
CMK-1(V292A/V294A)	wt	90	20	0.778483
CMK-1(V292A/V294A)	wt	90	20	0.792982
CMK-1(V292A/V294A)	wt	90	20	0.79797
CMK-1(V292A/V294A)	wt	90	20	0.799497
CMK-1(V292A/V294A)	wt	90	20	0.809223
CMK-1(V292A/V294A)	wt	90	20	0.843196
CMK-1(V292A/V294A)	wt	90	20	0.849364
CMK-1(V292A/V294A)	wt	90	20	0.854583
CMK-1(V292A/V294A)	wt	90	20	0.856726
CMK-1(V292A/V294A)	wt	90	20	0.857174
CMK-1(V292A/V294A)	wt	90	20	0.860514
CMK-1(V292A/V294A)	wt	90	20	0.872929
CMK-1(V292A/V294A)	wt	90	20	0.873275
CMK-1(V292A/V294A)	wt	90	20	0.877492
CMK-1(V292A/V294A)	wt	90	20	0.878739
CMK-1(V292A/V294A)	wt	90	20	0.884764
CMK-1(V292A/V294A)	wt	90	20	0.889838
CMK-1(V292A/V294A)	wt	90	20	0.893364
CMK-1(V292A/V294A)	wt	90	20	0.898239
CMK-1(V292A/V294A)	wt	90	20	0.900817
CMK-1(V292A/V294A)	wt	90	20	0.907322
CMK-1(V292A/V294A)	wt	90	20	0.90764
CMK-1(V292A/V294A)	wt	90	20	0.937613
CMK-1(V292A/V294A)	wt	90	20	0.938031
CMK-1(V292A/V294A)	wt	90	20	0.96389
CMK-1(V292A/V294A)	wt	90	20	0.976086
CMK-1(V292A/V294A)	wt	90	20	0.976621
CMK-1(V292A/V294A)	wt	90	20	0.976712
CMK-1(V292A/V294A)	wt	90	20	0.976898
CMK-1(V292A/V294A)	wt	90	20	0.988617
CMK-1(V292A/V294A)	wt	90	20	0.988987
CMK-1(V292A/V294A)	wt	90	20	0.996304
CMK-1(V292A/V294A)	wt	90	20	0.997468
CMK-1(V292A/V294A)	wt	90	20	0.998137
CMK-1(V292A/V294A)	wt	90	20	1.00095
CMK-1(V292A/V294A)	wt	90	20	1.02794
CMK-1(V292A/V294A)	wt	90	20	1.03541
CMK-1(V292A/V294A)	wt	90	20	1.04181
CMK-1(V292A/V294A)	wt	90	20	1.04392
CMK-1(V292A/V294A)	wt	90	20	1.054
CMK-1(V292A/V294A)	wt	90	20	1.05526
CMK-1(V292A/V294A)	wt	90	20	1.05649
CMK-1(V292A/V294A)	wt	90	20	1.05959
CMK-1(V292A/V294A)	wt	90	20	1.06186
CMK-1(V292A/V294A)	wt	90	20	1.06352
CMK-1(V292A/V294A)	wt	90	20	1.06608
CMK-1(V292A/V294A)	wt	90	20	1.06633
CMK-1(V292A/V294A)	wt	90	20	1.06963
CMK-1(V292A/V294A)	wt	90	20	1.07101
CMK-1(V292A/V294A)	wt	90	20	1.07328
CMK-1(V292A/V294A)	wt	90	20	1.08067
CMK-1(V292A/V294A)	wt	90	20	1.08773
CMK-1(V292A/V294A)	wt	90	20	1.09001
CMK-1(V292A/V294A)	wt	90	20	1.09038
CMK-1(V292A/V294A)	wt	90	20	1.09128
CMK-1(V292A/V294A)	wt	90	20	1.0944
CMK-1(V292A/V294A)	wt	90	20	1.09593
CMK-1(V292A/V294A)	wt	90	20	1.10966
CMK-1(V292A/V294A)	wt	90	20	1.11103
CMK-1(V292A/V294A)	wt	90	20	1.11994
CMK-1(V292A/V294A)	wt	90	20	1.13798
CMK-1(V292A/V294A)	wt	90	20	1.13929
CMK-1(V292A/V294A)	wt	90	20	1.14416
CMK-1(V292A/V294A)	wt	90	20	1.14475
CMK-1(V292A/V294A)	wt	90	20	1.14647
CMK-1(V292A/V294A)	wt	90	20	1.14688
CMK-1(V292A/V294A)	wt	90	20	1.17574
CMK-1(V292A/V294A)	wt	90	20	1.18478
CMK-1(V292A/V294A)	wt	90	20	1.19557
CMK-1(V292A/V294A)	wt	90	20	1.2146
CMK-1(V292A/V294A)	wt	90	20	1.22976
CMK-1(V292A/V294A)	wt	90	20	1.2332
CMK-1(V292A/V294A)	wt	90	20	1.24032
CMK-1(V292A/V294A)	wt	90	20	1.24391
CMK-1(V292A/V294A)	wt	90	20	1.24596
CMK-1(V292A/V294A)	wt	90	20	1.2497
CMK-1(V292A/V294A)	wt	90	20	1.25218
CMK-1(V292A/V294A)	wt	90	20	1.26028
CMK-1(V292A/V294A)	wt	90	20	1.27083
CMK-1(V292A/V294A)	wt	90	20	1.27267
CMK-1(V292A/V294A)	wt	90	20	1.29095
CMK-1(V292A/V294A)	wt	90	20	1.29498
CMK-1(V292A/V294A)	wt	90	20	1.31541
CMK-1(V292A/V294A)	wt	90	20	1.31903
CMK-1(V292A/V294A)	wt	90	20	1.32161
CMK-1(V292A/V294A)	wt	90	20	1.33144
CMK-1(V292A/V294A)	wt	90	20	1.33819
CMK-1(V292A/V294A)	wt	90	20	1.3402
CMK-1(V292A/V294A)	wt	90	20	1.34511
CMK-1(V292A/V294A)	wt	90	20	1.34846
CMK-1(V292A/V294A)	wt	90	20	1.35195
CMK-1(V292A/V294A)	wt	90	20	1.35212
CMK-1(V292A/V294A)	wt	90	20	1.36218
CMK-1(V292A/V294A)	wt	90	20	1.3628
CMK-1(V292A/V294A)	wt	90	20	1.36535
CMK-1(V292A/V294A)	wt	90	20	1.37729
CMK-1(V292A/V294A)	wt	90	20	1.38061
CMK-1(V292A/V294A)	wt	90	20	1.3812
CMK-1(V292A/V294A)	wt	90	20	1.39742
CMK-1(V292A/V294A)	wt	90	20	1.39864
CMK-1(V292A/V294A)	wt	90	20	1.41832
CMK-1(V292A/V294A)	wt	90	20	1.42284
CMK-1(V292A/V294A)	wt	90	20	1.42444
CMK-1(V292A/V294A)	wt	90	20	1.42721
CMK-1(V292A/V294A)	wt	90	20	1.42946
CMK-1(V292A/V294A)	wt	90	20	1.43337
CMK-1(V292A/V294A)	wt	90	20	1.4415
CMK-1(V292A/V294A)	wt	90	20	1.44252
CMK-1(V292A/V294A)	wt	90	20	1.45301
CMK-1(V292A/V294A)	wt	90	20	1.47606
CMK-1(V292A/V294A)	wt	90	20	1.48817
CMK-1(V292A/V294A)	wt	90	20	1.49058
CMK-1(V292A/V294A)	wt	90	20	1.5
CMK-1(V292A/V294A)	wt	90	20	1.50663
CMK-1(V292A/V294A)	wt	90	20	1.55055
CMK-1(V292A/V294A)	wt	90	20	1.60701
CMK-1(V292A/V294A)	wt	90	20	1.67043
CMK-1(V292A/V294A)	wt	90	20	1.70253
CMK-1(V292A/V294A)	wt	90	20	1.76451
CMK-1(V292A/V294A)	wt	90	20	1.83044
CMK-1(V292A/V294A)	wt	90	20	1.87632
CMK-1(V292A/V294A)	wt	90	28	0.892748
CMK-1(V292A/V294A)	wt	90	28	1.02442
CMK-1(V292A/V294A)	wt	90	28	0.924091
CMK-1(V292A/V294A)	wt	90	28	0.974661
CMK-1(V292A/V294A)	wt	90	28	1.56595
CMK-1(V292A/V294A)	wt	90	28	1.59987
CMK-1(V292A/V294A)	wt	90	28	1.09435
CMK-1(V292A/V294A)	wt	90	28	0.80623
CMK-1(V292A/V294A)	wt	90	28	1.08247
CMK-1(V292A/V294A)	wt	90	28	1.11362
CMK-1(V292A/V294A)	wt	90	28	1.21333
CMK-1(V292A/V294A)	wt	90	28	1.25367
CMK-1(V292A/V294A)	wt	90	28	0.832625
CMK-1(V292A/V294A)	wt	90	28	0.897032
CMK-1(V292A/V294A)	wt	90	28	1.07535
CMK-1(V292A/V294A)	wt	90	28	2.02341
CMK-1(V292A/V294A)	wt	90	28	0.957765
CMK-1(V292A/V294A)	wt	90	28	0.990292
CMK-1(V292A/V294A)	wt	90	28	1.01119
CMK-1(V292A/V294A)	wt	90	28	1.12507
CMK-1(V292A/V294A)	wt	90	28	1.47567
CMK-1(V292A/V294A)	wt	90	28	1.50476
CMK-1(V292A/V294A)	wt	90	28	1.3844
CMK-1(V292A/V294A)	wt	90	28	0.725356
CMK-1(V292A/V294A)	wt	90	28	0.77276
CMK-1(V292A/V294A)	wt	90	28	0.835008
CMK-1(V292A/V294A)	wt	90	28	0.851516
CMK-1(V292A/V294A)	wt	90	28	0.959268
CMK-1(V292A/V294A)	wt	90	28	0.971489
CMK-1(V292A/V294A)	wt	90	28	1.12983
CMK-1(V292A/V294A)	wt	90	28	1.14587
CMK-1(V292A/V294A)	wt	90	28	1.19884
CMK-1(V292A/V294A)	wt	90	28	1.39943
CMK-1(V292A/V294A)	wt	90	28	1.42761
CMK-1(V292A/V294A)	wt	90	28	0.604264
CMK-1(V292A/V294A)	wt	90	28	1.10224
CMK-1(V292A/V294A)	wt	90	28	1.14081
CMK-1(V292A/V294A)	wt	90	28	1.16671
CMK-1(V292A/V294A)	wt	90	28	1.20844
CMK-1(V292A/V294A)	wt	90	28	1.27022
CMK-1(V292A/V294A)	wt	90	28	1.28507
CMK-1(V292A/V294A)	wt	90	28	1.36162
CMK-1(V292A/V294A)	wt	90	28	1.44113
CMK-1(V292A/V294A)	wt	90	28	1.11249
CMK-1(V292A/V294A)	wt	90	28	0.514116
CMK-1(V292A/V294A)	wt	90	28	0.70172
CMK-1(V292A/V294A)	wt	90	28	0.724287
CMK-1(V292A/V294A)	wt	90	28	0.761247
CMK-1(V292A/V294A)	wt	90	28	0.796607
CMK-1(V292A/V294A)	wt	90	28	0.900517
CMK-1(V292A/V294A)	wt	90	28	0.991948
CMK-1(V292A/V294A)	wt	90	28	1.0258
CMK-1(V292A/V294A)	wt	90	28	1.03167
CMK-1(V292A/V294A)	wt	90	28	1.04625
CMK-1(V292A/V294A)	wt	90	28	1.16641
CMK-1(V292A/V294A)	wt	90	28	1.17549
CMK-1(V292A/V294A)	wt	90	28	1.23337
CMK-1(V292A/V294A)	wt	90	28	1.28637
CMK-1(V292A/V294A)	wt	90	28	1.73583
CMK-1(V292A/V294A)	wt	90	28	0.784182
CMK-1(V292A/V294A)	wt	90	28	0.809378
CMK-1(V292A/V294A)	wt	90	28	1.24021
CMK-1(V292A/V294A)	wt	90	28	1.43162
CMK-1(V292A/V294A)	wt	90	28	0.920898
CMK-1(V292A/V294A)	wt	90	28	1.00523
CMK-1(V292A/V294A)	wt	90	28	0.85362
CMK-1(V292A/V294A)	wt	90	28	0.88807
CMK-1(V292A/V294A)	wt	90	28	1.25523
CMK-1(V292A/V294A)	wt	90	28	1.54963
CMK-1(V292A/V294A)	wt	90	28	0.978886
CMK-1(V292A/V294A)	wt	90	28	1.046
CMK-1(V292A/V294A)	wt	90	28	1.13378
CMK-1(V292A/V294A)	wt	90	28	1.15096
CMK-1(V292A/V294A)	wt	90	28	0.626846
CMK-1(V292A/V294A)	wt	90	28	0.859096
CMK-1(V292A/V294A)	wt	90	28	1.05153
CMK-1(V292A/V294A)	wt	90	28	1.63295
CMK-1(V292A/V294A)	wt	90	28	1.71176
CMK-1(V292A/V294A)	wt	90	28	1.88034
CMK-1(V292A/V294A)	wt	90	28	0.788498
CMK-1(V292A/V294A)	wt	90	28	0.892366
CMK-1(V292A/V294A)	wt	90	28	1.8726
CMK-1(V292A/V294A)	wt	90	28	0.872981
CMK-1(V292A/V294A)	wt	90	28	0.909119
CMK-1(V292A/V294A)	wt	90	28	0.964851
CMK-1(V292A/V294A)	wt	90	28	0.974562
CMK-1(V292A/V294A)	wt	90	28	1.15993
CMK-1(V292A/V294A)	wt	90	28	1.17304
CMK-1(V292A/V294A)	wt	90	28	1.39811
CMK-1(V292A/V294A)	wt	90	28	0.893186
CMK-1(V292A/V294A)	wt	90	28	0.984729
CMK-1(V292A/V294A)	wt	90	28	1
CMK-1(V292A/V294A)	wt	90	28	1.01347
CMK-1(V292A/V294A)	wt	90	28	1.06568
CMK-1(V292A/V294A)	wt	90	28	1.1577
CMK-1(V292A/V294A)	wt	90	28	1.23153
CMK-1(V292A/V294A)	wt	90	28	1.60327
CMK-1(V292A/V294A)	wt	90	28	0.643325
CMK-1(V292A/V294A)	wt	90	28	0.920422
CMK-1(V292A/V294A)	wt	90	28	0.960854
CMK-1(V292A/V294A)	wt	90	28	0.963141
CMK-1(V292A/V294A)	wt	90	28	0.996373
CMK-1(V292A/V294A)	wt	90	28	1.22901
CMK-1(V292A/V294A)	wt	90	28	1.39417
CMK-1(V292A/V294A)	wt	90	28	1.40032
CMK-1(V292A/V294A)	wt	90	28	2.55068
CMK-1(V292A/V294A)	wt	90	28	0.945328
CMK-1(V292A/V294A)	wt	90	28	1.10792
CMK-1(V292A/V294A)	wt	90	28	1.23826
CMK-1(V292A/V294A)	wt	90	28	0.755152
CMK-1(V292A/V294A)	wt	90	28	0.816726
CMK-1(V292A/V294A)	wt	90	28	0.867462
CMK-1(V292A/V294A)	wt	90	28	0.889724
CMK-1(V292A/V294A)	wt	90	28	0.890468
CMK-1(V292A/V294A)	wt	90	28	0.978298
CMK-1(V292A/V294A)	wt	90	28	1.12577
CMK-1(V292A/V294A)	wt	90	28	1.6288
CMK-1(V292A/V294A)	wt	90	28	0.946969
CMK-1(V292A/V294A)	wt	90	28	0.964524
CMK-1(V292A/V294A)	wt	90	28	1.20438
CMK-1(V292A/V294A)	wt	90	28	1.26398
CMK-1(V292A/V294A)	wt	90	28	1.26488
CMK-1(V292A/V294A)	wt	90	28	1.39878
CMK-1(V292A/V294A)	wt	90	28	0.808819
CMK-1(V292A/V294A)	wt	90	28	0.833716
CMK-1(V292A/V294A)	wt	90	28	0.869618
CMK-1(V292A/V294A)	wt	90	28	0.9315
CMK-1(V292A/V294A)	wt	90	28	0.960131
CMK-1(V292A/V294A)	wt	90	28	0.961096
CMK-1(V292A/V294A)	wt	90	28	0.964851
CMK-1(V292A/V294A)	wt	90	28	0.986405
CMK-1(V292A/V294A)	wt	90	28	0.996807
CMK-1(V292A/V294A)	wt	90	28	1.07986
CMK-1(V292A/V294A)	wt	90	28	1.2301
CMK-1(V292A/V294A)	wt	90	28	1.29867
CMK-1(V292A/V294A)	wt	90	28	0.952605
CMK-1(V292A/V294A)	wt	90	28	0.955675
CMK-1(V292A/V294A)	wt	90	28	0.990485
CMK-1(V292A/V294A)	wt	90	28	1.0318
CMK-1(V292A/V294A)	wt	90	28	1.42466
CMK-1(V292A/V294A)	wt	90	28	0.747011
CMK-1(V292A/V294A)	wt	90	28	0.862842
CMK-1(V292A/V294A)	wt	90	28	0.952464
CMK-1(V292A/V294A)	wt	90	28	0.989918
CMK-1(V292A/V294A)	wt	90	28	0.999381
CMK-1(V292A/V294A)	wt	90	28	1.01492
CMK-1(V292A/V294A)	wt	90	28	1.49755
CMK-1(V292A/V294A)	wt	90	28	0.595392
CMK-1(V292A/V294A)	wt	90	28	0.769414
CMK-1(V292A/V294A)	wt	90	28	0.814459
CMK-1(V292A/V294A)	wt	90	28	0.918402
CMK-1(V292A/V294A)	wt	90	28	1.00177
CMK-1(V292A/V294A)	wt	90	28	1.16797
CMK-1(V292A/V294A)	wt	90	28	1.31308
CMK-1(V292A/V294A)	wt	90	28	1.43018
CMK-1(V292A/V294A)	wt	90	28	1.81134
CMK-1(V292A/V294A)	wt	90	28	1.16304
CMK-1(V292A/V294A)	wt	90	28	1.21653
CMK-1(V292A/V294A)	wt	90	28	1.52821
CMK-1(V292A/V294A)	wt	90	28	1.68587
CMK-1(V292A/V294A)	wt	90	28	0.775591
CMK-1(V292A/V294A)	wt	90	28	0.882846
CMK-1(V292A/V294A)	wt	90	28	0.893632
CMK-1(V292A/V294A)	wt	90	28	0.957954
CMK-1(V292A/V294A)	wt	90	28	1.07297
CMK-1(V292A/V294A)	wt	90	28	1.13162
CMK-1(V292A/V294A)	wt	90	28	1.29073
CMK-1(V292A/V294A)	wt	90	28	1.33712
CMK-1(V292A/V294A)	wt	90	28	1.49243
CMK-1(V292A/V294A)	wt	90	28	0.971517
CMK-1(V292A/V294A)	wt	90	28	1.05184
CMK-1(V292A/V294A)	wt	90	28	1.39111
CMK-1(V292A/V294A)	wt	90	28	0.794785
CMK-1(V292A/V294A)	wt	90	28	0.810444
CMK-1(V292A/V294A)	wt	90	28	0.977216
CMK-1(V292A/V294A)	wt	90	28	1.10408
CMK-1(V292A/V294A)	wt	90	28	1.82406
CMK-1(V292A/V294A)	wt	90	28	0.999535
CMK-1(V292A/V294A)	wt	90	28	1.02571
CMK-1(V292A/V294A)	wt	90	28	0.846111
CMK-1(V292A/V294A)	wt	90	28	0.880914
CMK-1(V292A/V294A)	wt	90	28	1.04302
CMK-1(V292A/V294A)	wt	90	28	1.33169
CMK-1(V292A/V294A)	wt	90	28	0.703905
CMK-1(V292A/V294A)	wt	90	28	0.9952
CMK-1(V292A/V294A)	wt	90	28	1.00422
CMK-1(V292A/V294A)	wt	90	28	1.07108
CMK-1(V292A/V294A)	wt	90	28	1.09354
CMK-1(V292A/V294A)	wt	90	28	1.21203
CMK-1(V292A/V294A)	wt	90	28	1.35292
CMK-1(V292A/V294A)	wt	90	28	0.826536
CMK-1(V292A/V294A)	wt	90	28	0.979537
CMK-1(V292A/V294A)	wt	90	28	1.0042
CMK-1(V292A/V294A)	wt	90	28	1.05279
CMK-1(V292A/V294A)	wt	90	28	1.2761
CMK-1(V292A/V294A)	wt	90	28	1.58768
CMK-1(V292A/V294A)	wt	90	28	0.843262
CMK-1(V292A/V294A)	wt	90	28	0.664669
CMK-1(V292A/V294A)	wt	90	28	1.04748
CMK-1(V292A/V294A)	wt	90	28	1.1206
CMK-1(V292A/V294A)	wt	90	28	1.43886
CMK-1(wt)	wt	90	20	0.473019
CMK-1(wt)	wt	90	20	1.303
CMK-1(wt)	wt	90	20	0.808263
CMK-1(wt)	wt	90	20	0.594935
CMK-1(wt)	wt	90	20	0.533113
CMK-1(wt)	wt	90	20	0.661159
CMK-1(wt)	wt	90	20	0.319222
CMK-1(wt)	wt	90	20	1.26003
CMK-1(wt)	wt	90	20	0.782069
CMK-1(wt)	wt	90	20	0.87738
CMK-1(wt)	wt	90	20	0.680648
CMK-1(wt)	wt	90	20	0.744045
CMK-1(wt)	wt	90	20	0.819726
CMK-1(wt)	wt	90	20	0.864919
CMK-1(wt)	wt	90	20	0.727276
CMK-1(wt)	wt	90	20	0.720874
CMK-1(wt)	wt	90	20	0.525943
CMK-1(wt)	wt	90	20	1.05365
CMK-1(wt)	wt	90	20	0.692145
CMK-1(wt)	wt	90	20	0.757214
CMK-1(wt)	wt	90	20	0.875013
CMK-1(wt)	wt	90	20	0.786115
CMK-1(wt)	wt	90	20	0.630896
CMK-1(wt)	wt	90	20	0.67734
CMK-1(wt)	wt	90	20	0.664836
CMK-1(wt)	wt	90	20	0.741725
CMK-1(wt)	wt	90	20	0.787346
CMK-1(wt)	wt	90	20	0.656809
CMK-1(wt)	wt	90	20	0.562018
CMK-1(wt)	wt	90	20	0.481664
CMK-1(wt)	wt	90	20	0.544429
CMK-1(wt)	wt	90	20	0.937093
CMK-1(wt)	wt	90	20	0.878839
CMK-1(wt)	wt	90	20	0.38281
CMK-1(wt)	wt	90	20	0.950385
CMK-1(wt)	wt	90	20	0.620439
CMK-1(wt)	wt	90	20	0.720794
CMK-1(wt)	wt	90	20	0.720385
CMK-1(wt)	wt	90	20	0.731717
CMK-1(wt)	wt	90	20	0.665965
CMK-1(wt)	wt	90	20	0.875846
CMK-1(wt)	wt	90	20	0.645434
CMK-1(wt)	wt	90	20	0.998427
CMK-1(wt)	wt	90	20	0.851928
CMK-1(wt)	wt	90	20	1.07834
CMK-1(wt)	wt	90	20	0.483533
CMK-1(wt)	wt	90	20	0.581299
CMK-1(wt)	wt	90	20	0.748993
CMK-1(wt)	wt	90	20	0.34962
CMK-1(wt)	wt	90	20	0.645282
CMK-1(wt)	wt	90	20	0.623701
CMK-1(wt)	wt	90	20	0.476569
CMK-1(wt)	wt	90	20	0.539175
CMK-1(wt)	wt	90	20	0.822585
CMK-1(wt)	wt	90	20	0.689603
CMK-1(wt)	wt	90	20	1.09441
CMK-1(wt)	wt	90	20	0.768915
CMK-1(wt)	wt	90	20	0.942472
CMK-1(wt)	wt	90	20	0.591433
CMK-1(wt)	wt	90	20	0.85343
CMK-1(wt)	wt	90	20	0.763793
CMK-1(wt)	wt	90	20	0.666673
CMK-1(wt)	wt	90	20	0.558317
CMK-1(wt)	wt	90	20	0.86315
CMK-1(wt)	wt	90	20	0.733202
CMK-1(wt)	wt	90	20	0.835671
CMK-1(wt)	wt	90	20	0.615459
CMK-1(wt)	wt	90	20	0.746994
CMK-1(wt)	wt	90	20	0.822351
CMK-1(wt)	wt	90	20	1.05601
CMK-1(wt)	wt	90	20	0.658896
CMK-1(wt)	wt	90	20	0.806686
CMK-1(wt)	wt	90	20	0.828098
CMK-1(wt)	wt	90	20	0.771503
CMK-1(wt)	wt	90	20	0.554106
CMK-1(wt)	wt	90	20	0.756286
CMK-1(wt)	wt	90	20	0.603907
CMK-1(wt)	wt	90	20	0.698028
CMK-1(wt)	wt	90	20	0.959033
CMK-1(wt)	wt	90	20	0.64171
CMK-1(wt)	wt	90	20	0.785428
CMK-1(wt)	wt	90	20	0.823208
CMK-1(wt)	wt	90	20	0.601195
CMK-1(wt)	wt	90	20	0.97342
CMK-1(wt)	wt	90	20	0.841575
CMK-1(wt)	wt	90	20	0.653143
CMK-1(wt)	wt	90	20	0.646663
CMK-1(wt)	wt	90	20	0.635143
CMK-1(wt)	wt	90	20	0.715889
CMK-1(wt)	wt	90	20	0.980372
CMK-1(wt)	wt	90	20	0.795259
CMK-1(wt)	wt	90	20	0.643706
CMK-1(wt)	wt	90	20	0.884988
CMK-1(wt)	wt	90	20	0.985084
CMK-1(wt)	wt	90	20	0.805114
CMK-1(wt)	wt	90	20	0.718643
CMK-1(wt)	wt	90	20	0.704781
CMK-1(wt)	wt	90	20	0.752672
CMK-1(wt)	wt	90	20	0.675876
CMK-1(wt)	wt	90	20	0.903074
CMK-1(wt)	wt	90	20	0.672586
CMK-1(wt)	wt	90	20	0.712139
CMK-1(wt)	wt	90	20	0.754655
CMK-1(wt)	wt	90	20	0.637346
CMK-1(wt)	wt	90	20	0.699331
CMK-1(wt)	wt	90	20	0.571308
CMK-1(wt)	wt	90	20	0.836636
CMK-1(wt)	wt	90	20	0.510453
CMK-1(wt)	wt	90	20	0.579166
CMK-1(wt)	wt	90	20	0.747276
CMK-1(wt)	wt	90	20	0.456193
CMK-1(wt)	wt	90	20	0.515373
CMK-1(wt)	wt	90	20	0.98725
CMK-1(wt)	wt	90	20	0.524466
CMK-1(wt)	wt	90	20	0.680795
CMK-1(wt)	wt	90	20	0.997304
CMK-1(wt)	wt	90	20	0.679328
CMK-1(wt)	wt	90	20	0.857307
CMK-1(wt)	wt	90	20	0.762139
CMK-1(wt)	wt	90	20	0.741427
CMK-1(wt)	wt	90	20	0.852884
CMK-1(wt)	wt	90	20	0.8168
CMK-1(wt)	wt	90	20	0.808301
CMK-1(wt)	wt	90	20	1.00668
CMK-1(wt)	wt	90	20	0.49776
CMK-1(wt)	wt	90	20	0.947389
CMK-1(wt)	wt	90	20	0.65263
CMK-1(wt)	wt	90	20	0.766906
CMK-1(wt)	wt	90	20	0.478065
CMK-1(wt)	wt	90	20	0.771015
CMK-1(wt)	wt	90	20	0.72869
CMK-1(wt)	wt	90	20	0.644236
CMK-1(wt)	wt	90	20	1.08832
CMK-1(wt)	wt	90	20	0.68634
CMK-1(wt)	wt	90	20	0.58851
CMK-1(wt)	wt	90	20	0.800005
CMK-1(wt)	wt	90	20	0.763277
CMK-1(wt)	wt	90	20	0.842763
CMK-1(wt)	wt	90	20	0.917042
CMK-1(wt)	wt	90	20	0.648083
CMK-1(wt)	wt	90	20	0.524442
CMK-1(wt)	wt	90	20	0.844913
CMK-1(wt)	wt	90	20	0.998754
CMK-1(wt)	wt	90	20	0.750364
CMK-1(wt)	wt	90	20	0.899168
CMK-1(wt)	wt	90	20	0.792508
CMK-1(wt)	wt	90	20	0.970185
CMK-1(wt)	wt	90	20	0.883997
CMK-1(wt)	wt	90	20	0.640227
CMK-1(wt)	wt	90	20	0.706911
CMK-1(wt)	wt	90	20	0.784725
CMK-1(wt)	wt	90	20	0.667658
CMK-1(wt)	wt	90	20	0.595531
CMK-1(wt)	wt	90	20	0.769289
CMK-1(wt)	wt	90	20	0.761312
CMK-1(wt)	wt	90	20	0.820099
CMK-1(wt)	wt	90	20	0.912982
CMK-1(wt)	wt	90	20	1.05665
CMK-1(wt)	wt	90	20	0.835884
CMK-1(wt)	wt	90	20	1.03481
CMK-1(wt)	wt	90	20	0.960305
CMK-1(wt)	wt	90	20	0.633265
CMK-1(wt)	wt	90	20	0.978584
CMK-1(wt)	wt	90	20	0.438606
CMK-1(wt)	wt	90	20	0.52793
CMK-1(wt)	wt	90	20	0.683848
CMK-1(wt)	wt	90	20	0.58684
CMK-1(wt)	wt	90	20	1.27772
CMK-1(wt)	wt	90	20	0.807259
CMK-1(wt)	wt	90	20	0.601074
CMK-1(wt)	wt	90	20	0.733526
CMK-1(wt)	wt	90	20	0.530397
CMK-1(wt)	wt	90	20	0.696634
CMK-1(wt)	wt	90	20	0.604764
CMK-1(wt)	wt	90	20	0.520781
CMK-1(wt)	wt	90	20	0.584957
CMK-1(wt)	wt	90	20	0.872191
CMK-1(wt)	wt	90	20	0.623301
CMK-1(wt)	wt	90	20	0.719633
CMK-1(wt)	wt	90	20	0.729495
CMK-1(wt)	wt	90	20	0.739198
CMK-1(wt)	wt	90	20	0.695871
CMK-1(wt)	wt	90	20	0.8643
CMK-1(wt)	wt	90	28	1.19819
CMK-1(wt)	wt	90	28	1.0443
CMK-1(wt)	wt	90	28	1.01436
CMK-1(wt)	wt	90	28	1.23024
CMK-1(wt)	wt	90	28	0.753519
CMK-1(wt)	wt	90	28	0.95083
CMK-1(wt)	wt	90	28	1.3989
CMK-1(wt)	wt	90	28	0.799991
CMK-1(wt)	wt	90	28	0.78356
CMK-1(wt)	wt	90	28	1.11882
CMK-1(wt)	wt	90	28	1.07783
CMK-1(wt)	wt	90	28	1.06896
CMK-1(wt)	wt	90	28	1.13239
CMK-1(wt)	wt	90	28	1.44189
CMK-1(wt)	wt	90	28	1.06156
CMK-1(wt)	wt	90	28	1.1834
CMK-1(wt)	wt	90	28	0.783722
CMK-1(wt)	wt	90	28	0.839066
CMK-1(wt)	wt	90	28	1.16321
CMK-1(wt)	wt	90	28	1.00323
CMK-1(wt)	wt	90	28	2.4716
CMK-1(wt)	wt	90	28	0.772079
CMK-1(wt)	wt	90	28	1.1657
CMK-1(wt)	wt	90	28	1.1712
CMK-1(wt)	wt	90	28	0.959349
CMK-1(wt)	wt	90	28	0.853785
CMK-1(wt)	wt	90	28	1.23041
CMK-1(wt)	wt	90	28	1.05824
CMK-1(wt)	wt	90	28	0.839403
CMK-1(wt)	wt	90	28	1.34239
CMK-1(wt)	wt	90	28	1.12644
CMK-1(wt)	wt	90	28	1.30574
CMK-1(wt)	wt	90	28	0.618841
CMK-1(wt)	wt	90	28	1.2255
CMK-1(wt)	wt	90	28	0.811997
CMK-1(wt)	wt	90	28	0.783859
CMK-1(wt)	wt	90	28	0.786631
CMK-1(wt)	wt	90	28	1.19404
CMK-1(wt)	wt	90	28	1.08692
CMK-1(wt)	wt	90	28	1.16595
CMK-1(wt)	wt	90	28	0.988517
CMK-1(wt)	wt	90	28	0.981891
CMK-1(wt)	wt	90	28	0.819592
CMK-1(wt)	wt	90	28	1.33168
CMK-1(wt)	wt	90	28	1.29446
CMK-1(wt)	wt	90	28	1.26506
CMK-1(wt)	wt	90	28	1.1362
CMK-1(wt)	wt	90	28	1.85868
CMK-1(wt)	wt	90	28	1.27453
CMK-1(wt)	wt	90	28	1.46211
CMK-1(wt)	wt	90	28	1.75509
CMK-1(wt)	wt	90	28	1.3478
CMK-1(wt)	wt	90	28	0.808541
CMK-1(wt)	wt	90	28	0.848597
CMK-1(wt)	wt	90	28	1.02195
CMK-1(wt)	wt	90	28	1.48577
CMK-1(wt)	wt	90	28	0.819411
CMK-1(wt)	wt	90	28	1.16648
CMK-1(wt)	wt	90	28	0.724393
CMK-1(wt)	wt	90	28	0.9657
CMK-1(wt)	wt	90	28	0.935253
CMK-1(wt)	wt	90	28	0.926235
CMK-1(wt)	wt	90	28	1.09624
CMK-1(wt)	wt	90	28	1.01826
CMK-1(wt)	wt	90	28	0.71697
CMK-1(wt)	wt	90	28	1.02294
CMK-1(wt)	wt	90	28	0.938415
CMK-1(wt)	wt	90	28	0.836564
CMK-1(wt)	wt	90	28	1.16862
CMK-1(wt)	wt	90	28	1.16119
CMK-1(wt)	wt	90	28	1.17402
CMK-1(wt)	wt	90	28	0.93681
CMK-1(wt)	wt	90	28	1.14149
CMK-1(wt)	wt	90	28	1.1209
CMK-1(wt)	wt	90	28	1.17144
CMK-1(wt)	wt	90	28	0.948739
CMK-1(wt)	wt	90	28	1.3105
CMK-1(wt)	wt	90	28	0.708037
CMK-1(wt)	wt	90	28	0.972255
CMK-1(wt)	wt	90	28	0.969462
CMK-1(wt)	wt	90	28	1.00384
CMK-1(wt)	wt	90	28	0.929535
CMK-1(wt)	wt	90	28	1.18355
CMK-1(wt)	wt	90	28	1.08961
CMK-1(wt)	wt	90	28	1.65866
CMK-1(wt)	wt	90	28	1.28683
CMK-1(wt)	wt	90	28	0.99846
CMK-1(wt)	wt	90	28	0.847323
CMK-1(wt)	wt	90	28	0.936303
CMK-1(wt)	wt	90	28	0.907096
CMK-1(wt)	wt	90	28	1.18069
CMK-1(wt)	wt	90	28	1.39098
CMK-1(wt)	wt	90	28	1.67995
CMK-1(wt)	wt	90	28	0.807371
CMK-1(wt)	wt	90	28	1.48119
CMK-1(wt)	wt	90	28	0.849587
CMK-1(wt)	wt	90	28	1.0678
CMK-1(wt)	wt	90	28	0.780048
CMK-1(wt)	wt	90	28	1.13162
CMK-1(wt)	wt	90	28	0.975229
CMK-1(wt)	wt	90	28	0.830102
CMK-1(wt)	wt	90	28	1.06907
CMK-1(wt)	wt	90	28	0.899066
CMK-1(wt)	wt	90	28	0.887416
CMK-1(wt)	wt	90	28	1.08648
CMK-1(wt)	wt	90	28	0.923831
CMK-1(wt)	wt	90	28	1.11525
CMK-1(wt)	wt	90	28	1.30826
CMK-1(wt)	wt	90	28	1.039
CMK-1(wt)	wt	90	28	1.05198
CMK-1(wt)	wt	90	28	1.06561
CMK-1(wt)	wt	90	28	1.0389
CMK-1(wt)	wt	90	28	1.07206
CMK-1(wt)	wt	90	28	1.01383
CMK-1(wt)	wt	90	28	1.2069
CMK-1(wt)	wt	90	28	1.17644
CMK-1(wt)	wt	90	28	1.37886
CMK-1(wt)	wt	90	28	0.974274
CMK-1(wt)	wt	90	28	1.09682
CMK-1(wt)	wt	90	28	0.903408
CMK-1(wt)	wt	90	28	0.954364
CMK-1(wt)	wt	90	28	0.955098
CMK-1(wt)	wt	90	28	1.34343
CMK-1(wt)	wt	90	28	1.24658
CMK-1(wt)	wt	90	28	1.25819
CMK-1(wt)	wt	90	28	0.846004
CMK-1(wt)	wt	90	28	1.24238
CMK-1(wt)	wt	90	28	0.969955
CMK-1(wt)	wt	90	28	1.24477
CMK-1(wt)	wt	90	28	1.24598
CMK-1(wt)	wt	90	28	0.95283
CMK-1(wt)	wt	90	28	1.15198
CMK-1(wt)	wt	90	28	0.87884
CMK-1(wt)	wt	90	28	1.14704
CMK-1(wt)	wt	90	28	0.972644
CMK-1(wt)	wt	90	28	1.02147
CMK-1(wt)	wt	90	28	1.01411
CMK-1(wt)	wt	90	28	1.01167
CMK-1(wt)	wt	90	28	1.08432
CMK-1(wt)	wt	90	28	1.10642
CMK-1(wt)	wt	90	28	1.18189
CMK-1(wt)	wt	90	28	1.1407
CMK-1(wt)	wt	90	28	0.941962
CMK-1(wt)	wt	90	28	1.06306
CMK-1(wt)	wt	90	28	1.29587
CMK-1(wt)	wt	90	28	0.905843
CMK-1(wt)	wt	90	28	1.12731
CMK-1(wt)	wt	90	28	1.13492
CMK-1(wt)	wt	90	28	1.10668
CMK-1(wt)	wt	90	28	0.986063
CMK-1(wt)	wt	90	28	0.959372
CMK-1(wt)	wt	90	28	1.17063
CMK-1(wt)	wt	90	28	1.12192
CMK-1(wt)	wt	90	28	1.01653
CMK-1(wt)	wt	90	28	0.9922
CMK-1(wt)	wt	90	28	1.2757
CMK-1(wt)	wt	90	28	0.933218
CMK-1(wt)	wt	90	28	1.11137
CMK-1(wt)	wt	90	28	1.12941
CMK-1(wt)	wt	90	28	1.10527
CMK-1(wt)	wt	90	28	0.88522
CMK-1(wt)	wt	90	28	0.96545
CMK-1(wt)	wt	90	28	0.832001
CMK-1(wt)	wt	90	28	1.00771
CMK-1(wt)	wt	90	28	0.928861
CMK-1(wt)	wt	90	28	0.759472
CMK-1(wt)	wt	90	28	0.8824
CMK-1(wt)	wt	90	28	1.38946
CMK-1(wt)	wt	90	28	1.11335
CMK-1(wt)	wt	90	28	0.968451
CMK-1(wt)	wt	90	28	0.718822
CMK-1(wt)	wt	90	28	0.855245
CMK-1(wt)	wt	90	28	1.41479
CMK-1(wt)	wt	90	28	0.440734
CMK-1(wt)	wt	90	28	1.07158
CMK-1(wt)	wt	90	28	0.99448
CMK-1(wt)	wt	90	28	1.11871
CMK-1(wt)	wt	90	28	1.06041
CMK-1(wt)	wt	90	28	1.24532
CMK-1(wt)	wt	90	28	1.31438
CMK-1(wt)	wt	90	28	1.40785
CMK-1(wt)	wt	90	28	1.03618
CMK-1(wt)	wt	90	28	0.949
CMK-1(wt)	wt	90	28	1.10149
CMK-1(wt)	wt	90	28	1.63899
CMK-1(wt)	wt	90	28	0.738995
CMK-1(wt)	wt	90	28	1.26474
CMK-1(wt)	wt	90	28	1.29381
CMK-1(wt)	wt	90	28	1.41352
CMK-1(wt)	wt	90	28	1.48619
CMK-1(wt)	wt	90	28	1.02664
CMK-1(wt)	wt	90	28	0.746594
CMK-1(wt)	wt	90	28	0.982394
CMK-1(wt)	wt	90	28	0.933078
CMK-1(wt)	wt	90	28	0.810059
CMK-1(wt)	wt	90	28	0.897424
CMK-1(wt)	wt	90	28	0.751113
CMK-1(wt)	wt	90	28	1.27491
CMK-1(wt)	wt	90	28	0.952449
CMK-1(wt)	wt	90	28	1.00497
CMK-1(wt)	wt	90	28	0.788553
CMK-1(wt)	wt	90	28	1.06553
CMK-1(wt)	wt	90	28	1.13231
CMK-1(wt)	wt	90	28	1.12543
CMK-1(wt)	wt	90	28	0.93447
CMK-1(wt)	wt	90	28	0.49608
CMK-1(wt)	wt	90	28	1.01088
CMK-1(wt)	wt	90	28	0.952353
CMK-1(wt)	wt	90	28	0.765901
CMK-1(wt)	wt	90	28	0.877167
CMK-1(wt)	wt	90	28	1.11481
CMK-1(wt)	wt	90	28	0.834296
CMK-1(wt)	wt	90	28	0.851837
CMK-1(wt)	wt	90	28	0.896971
CMK-1(V292A/V294A/W305S)	wt	90	20	0.797682
CMK-1(V292A/V294A/W305S)	wt	90	20	0.698628
CMK-1(V292A/V294A/W305S)	wt	90	20	0.979744
CMK-1(V292A/V294A/W305S)	wt	90	20	0.829966
CMK-1(V292A/V294A/W305S)	wt	90	20	0.531344
CMK-1(V292A/V294A/W305S)	wt	90	20	1.27613
CMK-1(V292A/V294A/W305S)	wt	90	20	0.716016
CMK-1(V292A/V294A/W305S)	wt	90	20	0.92477
CMK-1(V292A/V294A/W305S)	wt	90	20	0.809834
CMK-1(V292A/V294A/W305S)	wt	90	20	0.474387
CMK-1(V292A/V294A/W305S)	wt	90	20	0.62888
CMK-1(V292A/V294A/W305S)	wt	90	20	0.648977
CMK-1(V292A/V294A/W305S)	wt	90	20	0.692769
CMK-1(V292A/V294A/W305S)	wt	90	20	0.891748
CMK-1(V292A/V294A/W305S)	wt	90	20	0.710765
CMK-1(V292A/V294A/W305S)	wt	90	20	0.486909
CMK-1(V292A/V294A/W305S)	wt	90	20	0.536901
CMK-1(V292A/V294A/W305S)	wt	90	20	0.72835
CMK-1(V292A/V294A/W305S)	wt	90	20	0.741935
CMK-1(V292A/V294A/W305S)	wt	90	20	0.710691
CMK-1(V292A/V294A/W305S)	wt	90	20	0.664703
CMK-1(V292A/V294A/W305S)	wt	90	20	0.643392
CMK-1(V292A/V294A/W305S)	wt	90	20	0.510149
CMK-1(V292A/V294A/W305S)	wt	90	20	0.831418
CMK-1(V292A/V294A/W305S)	wt	90	28	0.654948
CMK-1(V292A/V294A/W305S)	wt	90	28	0.613622
CMK-1(V292A/V294A/W305S)	wt	90	28	0.68403
CMK-1(V292A/V294A/W305S)	wt	90	28	1.35988
CMK-1(V292A/V294A/W305S)	wt	90	28	0.499083
CMK-1(V292A/V294A/W305S)	wt	90	28	0.793928
CMK-1(V292A/V294A/W305S)	wt	90	28	0.981398
CMK-1(V292A/V294A/W305S)	wt	90	28	0.813036
CMK-1(V292A/V294A/W305S)	wt	90	28	0.804797
CMK-1(V292A/V294A/W305S)	wt	90	28	0.545947
CMK-1(V292A/V294A/W305S)	wt	90	28	0.672111
CMK-1(V292A/V294A/W305S)	wt	90	28	0.87724
CMK-1(V292A/V294A/W305S)	wt	90	28	0.578961
CMK-1(V292A/V294A/W305S)	wt	90	28	0.619865
CMK-1(V292A/V294A/W305S)	wt	90	28	0.783645
CMK-1(V292A/V294A/W305S)	wt	90	28	0.955539
CMK-1(V292A/V294A/W305S)	wt	90	28	0.855439
CMK-1(V292A/V294A/W305S)	wt	90	28	0.687246
CMK-1(V292A/V294A/W305S)	wt	90	28	0.741325
CMK-1(V292A/V294A/W305S)	wt	90	28	0.708624
CMK-1(V292A/V294A/W305S)	wt	90	28	0.823286
CMK-1(V292A/V294A/W305S)	wt	90	28	0.834252
CMK-1(V292A/V294A/W305S)	wt	90	28	0.609595
CMK-1(V292A/V294A/W305S)	wt	90	20	0.671618
CMK-1(V292A/V294A/W305S)	wt	90	20	0.602893
CMK-1(V292A/V294A/W305S)	wt	90	20	0.980767
CMK-1(V292A/V294A/W305S)	wt	90	20	0.953448
CMK-1(V292A/V294A/W305S)	wt	90	20	0.751827
CMK-1(V292A/V294A/W305S)	wt	90	20	0.764768
CMK-1(V292A/V294A/W305S)	wt	90	20	0.805755
CMK-1(V292A/V294A/W305S)	wt	90	20	0.798435
CMK-1(V292A/V294A/W305S)	wt	90	20	0.928799
CMK-1(V292A/V294A/W305S)	wt	90	20	0.763717
CMK-1(V292A/V294A/W305S)	wt	90	20	0.864409
CMK-1(V292A/V294A/W305S)	wt	90	28	0.787186
CMK-1(V292A/V294A/W305S)	wt	90	28	0.670191
CMK-1(V292A/V294A/W305S)	wt	90	28	0.712167
CMK-1(V292A/V294A/W305S)	wt	90	28	0.7888
CMK-1(V292A/V294A/W305S)	wt	90	28	0.577236
CMK-1(V292A/V294A/W305S)	wt	90	28	0.838399
CMK-1(V292A/V294A/W305S)	wt	90	28	0.775118
CMK-1(V292A/V294A/W305S)	wt	90	28	0.614804
CMK-1(V292A/V294A/W305S)	wt	90	28	0.601828
CMK-1(V292A/V294A/W305S)	wt	90	28	0.897781
CMK-1(V292A/V294A/W305S)	wt	90	28	0.549293
CMK-1(V292A/V294A/W305S)	wt	90	28	0.560572
CMK-1(V292A/V294A/W305S)	wt	90	28	0.695517
CMK-1(V292A/V294A/W305S)	wt	90	20	0.823036
CMK-1(V292A/V294A/W305S)	wt	90	20	0.878951
CMK-1(V292A/V294A/W305S)	wt	90	20	0.757976
CMK-1(V292A/V294A/W305S)	wt	90	20	1.10917
CMK-1(V292A/V294A/W305S)	wt	90	20	1.2635
CMK-1(V292A/V294A/W305S)	wt	90	20	0.683205
CMK-1(V292A/V294A/W305S)	wt	90	20	0.563299
CMK-1(V292A/V294A/W305S)	wt	90	20	0.821396
CMK-1(V292A/V294A/W305S)	wt	90	20	0.823016
CMK-1(V292A/V294A/W305S)	wt	90	20	0.926651
CMK-1(V292A/V294A/W305S)	wt	90	20	0.778881
CMK-1(V292A/V294A/W305S)	wt	90	20	0.903581
CMK-1(V292A/V294A/W305S)	wt	90	20	0.753941
CMK-1(V292A/V294A/W305S)	wt	90	28	0.887871
CMK-1(V292A/V294A/W305S)	wt	90	28	0.827856
CMK-1(V292A/V294A/W305S)	wt	90	28	0.631512
CMK-1(V292A/V294A/W305S)	wt	90	28	0.635274
CMK-1(V292A/V294A/W305S)	wt	90	28	0.692043
CMK-1(V292A/V294A/W305S)	wt	90	28	0.613478
CMK-1(V292A/V294A/W305S)	wt	90	28	0.700612
CMK-1(V292A/V294A/W305S)	wt	90	28	0.645468
CMK-1(V292A/V294A/W305S)	wt	90	28	0.623115
CMK-1(V292A/V294A/W305S)	wt	90	28	0.648905
CMK-1(V292A/V294A/W305S)	wt	90	28	0.854361
CMK-1(V292A/V294A/W305S)	wt	90	28	0.689224
CMK-1(V292A/V294A/W305S)	wt	90	28	0.849631
CMK-1(V292A/V294A/W305S)	wt	90	28	0.555248
CMK-1(V292A/V294A/W305S)	wt	90	28	0.593973
CMK-1(V292A/V294A/W305S)	wt	90	28	0.510711
CMK-1(V292A/V294A/W305S)	wt	90	28	0.829763
CMK-1(V292A/V294A/W305S)	wt	90	28	0.7175
CMK-1(V292A/V294A/W305S)	wt	90	28	0.66165
CMK-1(V292A/V294A/W305S)	wt	90	28	0.797505
CMK-1(V292A/V294A/W305S)	wt	90	20	0.894733
CMK-1(V292A/V294A/W305S)	wt	90	20	0.727795
CMK-1(V292A/V294A/W305S)	wt	90	20	1.01853
CMK-1(V292A/V294A/W305S)	wt	90	20	0.583689
CMK-1(V292A/V294A/W305S)	wt	90	20	0.722845
CMK-1(V292A/V294A/W305S)	wt	90	20	0.940889
CMK-1(V292A/V294A/W305S)	wt	90	20	1.07774
CMK-1(V292A/V294A/W305S)	wt	90	28	0.92858
CMK-1(V292A/V294A/W305S)	wt	90	28	0.521417
CMK-1(V292A/V294A/W305S)	wt	90	28	1.09729
CMK-1(V292A/V294A/W305S)	wt	90	28	1.01626
CMK-1(V292A/V294A/W305S)	wt	90	28	0.781486
CMK-1(V292A/V294A/W305S)	wt	90	28	0.799705
CMK-1(V292A/V294A/W305S)	wt	90	28	0.808377
CMK-1(V292A/V294A/W305S)	wt	90	28	0.854334
CMK-1(V292A/V294A/W305S)	wt	90	28	0.938016
CMK-1(V292A/V294A/W305S)	wt	90	28	1.00365
CMK-1(V292A/V294A/W305S)	wt	90	28	0.97163
CMK-1(V292A/V294A/W305S)	wt	90	20	0.609943
CMK-1(V292A/V294A/W305S)	wt	90	20	1.01894
CMK-1(V292A/V294A/W305S)	wt	90	20	0.718856
CMK-1(V292A/V294A/W305S)	wt	90	20	1.14973
CMK-1(V292A/V294A/W305S)	wt	90	20	0.778391
CMK-1(V292A/V294A/W305S)	wt	90	20	0.928574
CMK-1(V292A/V294A/W305S)	wt	90	20	0.950315
CMK-1(V292A/V294A/W305S)	wt	90	20	0.682724
CMK-1(V292A/V294A/W305S)	wt	90	20	0.883712
CMK-1(V292A/V294A/W305S)	wt	90	20	0.93273
CMK-1(V292A/V294A/W305S)	wt	90	20	0.91209
CMK-1(V292A/V294A/W305S)	wt	90	20	0.680143
CMK-1(V292A/V294A/W305S)	wt	90	20	0.773123
CMK-1(V292A/V294A/W305S)	wt	90	20	0.951706
CMK-1(V292A/V294A/W305S)	wt	90	20	0.667877
CMK-1(V292A/V294A/W305S)	wt	90	20	0.81428
CMK-1(V292A/V294A/W305S)	wt	90	20	0.723895
CMK-1(V292A/V294A/W305S)	wt	90	20	0.846641
CMK-1(V292A/V294A/W305S)	wt	90	20	0.671634
CMK-1(V292A/V294A/W305S)	wt	90	20	0.973263
CMK-1(V292A/V294A/W305S)	wt	90	20	0.908637
CMK-1(V292A/V294A/W305S)	wt	90	20	0.929314
CMK-1(V292A/V294A/W305S)	wt	90	20	0.969939
CMK-1(V292A/V294A/W305S)	wt	90	20	0.956241
CMK-1(V292A/V294A/W305S)	wt	90	20	0.941945
CMK-1(V292A/V294A/W305S)	wt	90	20	0.948572
CMK-1(V292A/V294A/W305S)	wt	90	20	0.792956
CMK-1(V292A/V294A/W305S)	wt	90	20	0.775761
CMK-1(V292A/V294A/W305S)	wt	90	20	0.666505
CMK-1(V292A/V294A/W305S)	wt	90	20	1.09874
CMK-1(V292A/V294A/W305S)	wt	90	20	0.871794
CMK-1(V292A/V294A/W305S)	wt	90	20	0.953023
CMK-1(V292A/V294A/W305S)	wt	90	20	1.01078
CMK-1(V292A/V294A/W305S)	wt	90	20	0.512355
CMK-1(V292A/V294A/W305S)	wt	90	20	0.945321
CMK-1(V292A/V294A/W305S)	wt	90	20	0.978162
CMK-1(V292A/V294A/W305S)	wt	90	20	0.693604
CMK-1(V292A/V294A/W305S)	wt	90	20	0.819203
CMK-1(V292A/V294A/W305S)	wt	90	28	0.874013
CMK-1(V292A/V294A/W305S)	wt	90	28	0.960919
CMK-1(V292A/V294A/W305S)	wt	90	28	0.945819
CMK-1(V292A/V294A/W305S)	wt	90	28	0.791287
CMK-1(V292A/V294A/W305S)	wt	90	28	0.861245
CMK-1(V292A/V294A/W305S)	wt	90	28	0.597723
CMK-1(V292A/V294A/W305S)	wt	90	28	0.6672
CMK-1(V292A/V294A/W305S)	wt	90	28	0.99324
CMK-1(V292A/V294A/W305S)	wt	90	28	0.972459
CMK-1(V292A/V294A/W305S)	wt	90	28	0.957733
CMK-1(V292A/V294A/W305S)	wt	90	28	0.591007
CMK-1(V292A/V294A/W305S)	wt	90	28	0.907707
CMK-1(V292A/V294A/W305S)	wt	90	28	0.948241
CMK-1(V292A/V294A/W305S)	wt	90	28	0.948593
CMK-1(V292A/V294A/W305S)	wt	90	28	0.707672
CMK-1(V292A/V294A/W305S)	wt	90	28	0.947905
CMK-1(V292A/V294A/W305S)	wt	90	28	0.940003
CMK-1(V292A/V294A/W305S)	wt	90	28	0.968172
CMK-1(V292A/V294A/W305S)	wt	90	28	0.898079
CMK-1(V292A/V294A/W305S)	wt	90	28	0.982833
CMK-1(V292A/V294A/W305S)	wt	90	28	0.977954
CMK-1(V292A/V294A/W305S)	wt	90	28	1.08595
CMK-1(V292A/V294A/W305S)	wt	90	28	0.917823
CMK-1(V292A/V294A/W305S)	wt	90	28	0.492901
CMK-1(V292A/V294A/W305S)	wt	90	28	0.850148
CMK-1(V292A/V294A/W305S)	wt	90	28	0.663941
CMK-1(V292A/V294A/W305S)	wt	90	28	0.420404
CMK-1(V292A/V294A/W305S)	wt	90	28	0.910395
CMK-1(V292A/V294A/W305S)	wt	90	28	0.837834
CMK-1(V292A/V294A/W305S)	wt	90	28	0.757842
CMK-1(V292A/V294A/W305S)	wt	90	28	0.973261
CMK-1(V292A/V294A/W305S)	wt	90	28	0.663717
CMK-1(V292A/V294A/W305S)	wt	90	28	0.678703
CMK-1(V292A/V294A/W305S)	wt	90	28	0.680409
CMK-1(V292A/V294A/W305S)	wt	90	28	0.994694
CMK-1(V292A/V294A/W305S)	wt	90	28	0.836307
CMK-1(V292A/V294A/W305S)	wt	90	28	0.472767
CMK-1(V292A/V294A/W305S)	wt	90	28	0.922778
CMK-1(V292A/V294A/W305S)	wt	90	28	0.635489
CMK-1(V292A/V294A/W305S)	wt	90	28	0.703918
CMK-1(V292A/V294A/W305S)	wt	90	28	0.672448
CMK-1(V292A/V294A/W305S)	wt	90	28	0.983411
CMK-1(V292A/V294A/W305S)	wt	90	28	0.772316
CMK-1(V292A/V294A/W305S)	wt	90	28	0.694452
CMK-1(V292A/V294A/W305S)	wt	90	28	0.973446
CMK-1(V292A/V294A/W305S)	wt	90	28	0.763646
CMK-1(V292A/V294A/W305S)	wt	90	28	0.778777
CMK-1(V292A/V294A/W305S)	wt	90	20	0.727273
CMK-1(V292A/V294A/W305S)	wt	90	20	0.654527
CMK-1(V292A/V294A/W305S)	wt	90	20	0.445137
CMK-1(V292A/V294A/W305S)	wt	90	20	0.950982
CMK-1(V292A/V294A/W305S)	wt	90	20	0.902591
CMK-1(V292A/V294A/W305S)	wt	90	20	0.832795
CMK-1(V292A/V294A/W305S)	wt	90	28	0.858573
CMK-1(V292A/V294A/W305S)	wt	90	28	0.758546
CMK-1(V292A/V294A/W305S)	wt	90	28	0.862571
CMK-1(V292A/V294A/W305S)	wt	90	28	0.694943
CMK-1(V292A/V294A/W305S)	wt	90	28	0.751722
CMK-1(V292A/V294A/W305S)	wt	90	28	0.937745
CMK-1(V292A/V294A/W305S)	wt	90	28	0.622851
CMK-1(V292A/V294A/W305S)	wt	90	28	0.961664
CMK-1(V292A/V294A/W305S)	wt	90	28	0.960509
CMK-1(V292A/V294A/W305S)	wt	90	28	0.664062
CMK-1(V292A/V294A/W305S)	wt	90	28	0.836091
CMK-1(V292A/V294A/W305S)	wt	90	28	0.911527
CMK-1(V292A/V294A/W305S)	wt	90	28	0.544838
CMK-1(V292A/V294A/W305S)	wt	90	28	0.879366
CMK-1(V292A/V294A/W305S)	wt	90	28	0.985886
CMK-1(V292A/V294A/W305S)	wt	90	28	0.859229
CMK-1(V292A/V294A/W305S)	wt	90	28	0.978976
CMK-1(V292A/V294A/W305S)	wt	90	28	0.540988
CMK-1(V292A/V294A/W305S)	wt	90	20	0.961954
CMK-1(V292A/V294A/W305S)	wt	90	20	0.934135
CMK-1(V292A/V294A/W305S)	wt	90	20	0.992597
CMK-1(V292A/V294A/W305S)	wt	90	20	0.772308
CMK-1(V292A/V294A/W305S)	wt	90	20	0.906197
CMK-1(V292A/V294A/W305S)	wt	90	20	0.940785
CMK-1(V292A/V294A/W305S)	wt	90	20	1.15135
CMK-1(V292A/V294A/W305S)	wt	90	20	0.575163
CMK-1(V292A/V294A/W305S)	wt	90	20	0.924515
CMK-1(V292A/V294A/W305S)	wt	90	20	1.03806
CMK-1(V292A/V294A/W305S)	wt	90	20	0.787462
CMK-1(V292A/V294A/W305S)	wt	90	20	1.00687
CMK-1(V292A/V294A/W305S)	wt	90	20	0.74601
CMK-1(V292A/V294A/W305S)	wt	90	20	0.694694
CMK-1(V292A/V294A/W305S)	wt	90	20	0.974182
CMK-1(V292A/V294A/W305S)	wt	90	20	0.609821
CMK-1(V292A/V294A/W305S)	wt	90	20	0.648743
CMK-1(V292A/V294A/W305S)	wt	90	20	0.704992
CMK-1(V292A/V294A/W305S)	wt	90	20	0.943775
CMK-1(V292A/V294A/W305S)	wt	90	20	0.708246
CMK-1(V292A/V294A/W305S)	wt	90	20	0.600429
CMK-1(V292A/V294A/W305S)	wt	90	28	0.831316
CMK-1(V292A/V294A/W305S)	wt	90	28	0.869166
CMK-1(V292A/V294A/W305S)	wt	90	28	0.944245
CMK-1(V292A/V294A/W305S)	wt	90	28	0.961921
CMK-1(V292A/V294A/W305S)	wt	90	28	0.990528
CMK-1(V292A/V294A/W305S)	wt	90	28	0.853871
CMK-1(V292A/V294A/W305S)	wt	90	28	0.842499
CMK-1(V292A/V294A/W305S)	wt	90	28	0.593165
CMK-1(V292A/V294A/W305S)	wt	90	28	0.757052
CMK-1(V292A/V294A/W305S)	wt	90	28	0.957575
CMK-1(V292A/V294A/W305S)	wt	90	28	0.96963
CMK-1(V292A/V294A/W305S)	wt	90	28	0.875133
CMK-1(V292A/V294A/W305S)	wt	90	28	0.680447
CMK-1(V292A/V294A/W305S)	wt	90	28	0.975571
CMK-1(V292A/V294A/W305S)	wt	90	28	0.999106
CMK-1(V292A/V294A/W305S)	wt	90	28	0.685659
CMK-1(V292A/V294A/W305S)	wt	90	28	0.813459
CMK-1(V292A/V294A/W305S)	wt	90	28	0.624885
CMK-1(V292A/V294A/W305S)	wt	90	28	0.538598
CMK-1(V292A/V294A/W305S)	wt	90	28	0.864705
CMK-1(V292A/V294A/W305S)	wt	90	28	0.909859
CMK-1(V292A/V294A/W305S)	wt	90	28	0.473597
CMK-1(V292A/V294A/W305S)	wt	90	28	0.880182
CMK-1(V292A/V294A/W305S)	wt	90	28	0.656609
CMK-1(V292A/V294A/W305S)	wt	90	28	0.812184
CMK-1(V292A/V294A/W305S)	wt	90	28	0.684089
CMK-1(V292A/V294A/W305S)	wt	90	28	0.651651
CMK-1(V292A/V294A/W305S)	wt	90	28	0.991795
CMK-1(V292A/V294A/W305S)	wt	90	28	0.905423
CMK-1(V292A/V294A/W305S)	wt	90	28	0.933737
CMK-1(V292A/V294A/W305S)	wt	90	28	0.81314
CMK-1(V292A/V294A/W305S)	wt	90	28	0.915975
CMK-1(V292A/V294A/W305S)	wt	90	20	0.61379
CMK-1(V292A/V294A/W305S)	wt	90	20	0.947854
CMK-1(V292A/V294A/W305S)	wt	90	20	0.852004
CMK-1(V292A/V294A/W305S)	wt	90	20	0.901927
CMK-1(V292A/V294A/W305S)	wt	90	20	0.364805
CMK-1(V292A/V294A/W305S)	wt	90	20	0.7088
CMK-1(V292A/V294A/W305S)	wt	90	20	0.688558
CMK-1(V292A/V294A/W305S)	wt	90	20	0.911554
CMK-1(V292A/V294A/W305S)	wt	90	20	0.958462
CMK-1(V292A/V294A/W305S)	wt	90	20	1.02033
CMK-1(V292A/V294A/W305S)	wt	90	20	0.899457
CMK-1(V292A/V294A/W305S)	wt	90	20	1.20251
CMK-1(V292A/V294A/W305S)	wt	90	20	0.742285
CMK-1(V292A/V294A/W305S)	wt	90	20	0.690535
CMK-1(V292A/V294A/W305S)	wt	90	20	0.832412
CMK-1(V292A/V294A/W305S)	wt	90	20	1.1974
CMK-1(V292A/V294A/W305S)	wt	90	20	0.748196
CMK-1(V292A/V294A/W305S)	wt	90	20	0.695411
CMK-1(V292A/V294A/W305S)	wt	90	20	0.956814
CMK-1(V292A/V294A/W305S)	wt	90	20	0.855765
CMK-1(V292A/V294A/W305S)	wt	90	28	0.564456
CMK-1(V292A/V294A/W305S)	wt	90	28	0.662203
CMK-1(V292A/V294A/W305S)	wt	90	28	0.545326
CMK-1(V292A/V294A/W305S)	wt	90	28	0.609646
CMK-1(V292A/V294A/W305S)	wt	90	28	0.551836
CMK-1(V292A/V294A/W305S)	wt	90	28	0.708676
CMK-1(V292A/V294A/W305S)	wt	90	28	0.351694
CMK-1(V292A/V294A/W305S)	wt	90	28	0.592361
CMK-1(V292A/V294A/W305S)	wt	90	28	1.15853
CMK-1(V292A/V294A/W305S)	wt	90	28	0.688547
CMK-1(V292A/V294A/W305S)	wt	90	28	0.643811
CMK-1(V292A/V294A/W305S)	wt	90	28	1.01868
CMK-1(V292A/V294A/W305S)	wt	90	28	0.481391
CMK-1(V292A/V294A/W305S)	wt	90	28	0.598622
CMK-1(V292A/V294A/W305S)	wt	90	28	0.513365
CMK-1(V292A/V294A/W305S)	wt	90	28	0.975006
CMK-1(V292A/V294A/W305S)	wt	90	28	0.540952
CMK-1(V292A/V294A/W305S)	wt	90	28	1.27609
CMK-1(V292A/V294A/W305S)	wt	90	28	0.669633
CMK-1(V292A/V294A/W305S)	wt	90	28	0.638425
CMK-1(V292A/V294A/W305S)	wt	90	28	0.56233
CMK-1(V292A/V294A/W305S)	wt	90	28	0.628359
CMK-1(V292A/V294A/W305S)	wt	90	28	0.411207
CMK-1(V292A/V294A/W305S)	wt	90	20	1.02524
CMK-1(V292A/V294A/W305S)	wt	90	20	0.988071
CMK-1(V292A/V294A/W305S)	wt	90	20	0.825032
CMK-1(V292A/V294A/W305S)	wt	90	20	0.956281
CMK-1(V292A/V294A/W305S)	wt	90	20	1.07993
CMK-1(V292A/V294A/W305S)	wt	90	20	0.743631
CMK-1(V292A/V294A/W305S)	wt	90	20	0.709863
CMK-1(V292A/V294A/W305S)	wt	90	20	0.909678
CMK-1(V292A/V294A/W305S)	wt	90	20	0.827708
CMK-1(V292A/V294A/W305S)	wt	90	20	1.10978
CMK-1(V292A/V294A/W305S)	wt	90	20	1.03903
CMK-1(V292A/V294A/W305S)	wt	90	20	0.811879
CMK-1(V292A/V294A/W305S)	wt	90	20	0.733135
CMK-1(V292A/V294A/W305S)	wt	90	20	0.931864
CMK-1(V292A/V294A/W305S)	wt	90	20	0.887535
CMK-1(V292A/V294A/W305S)	wt	90	28	0.711375
CMK-1(V292A/V294A/W305S)	wt	90	28	0.839959
CMK-1(V292A/V294A/W305S)	wt	90	28	0.654849
CMK-1(V292A/V294A/W305S)	wt	90	28	0.916212
CMK-1(V292A/V294A/W305S)	wt	90	28	1.01696
CMK-1(V292A/V294A/W305S)	wt	90	28	0.762135
CMK-1(V292A/V294A/W305S)	wt	90	28	0.678443
CMK-1(V292A/V294A/W305S)	wt	90	28	0.70112
CMK-1(V292A/V294A/W305S)	wt	90	28	0.848287
CMK-1(V292A/V294A/W305S)	wt	90	28	0.599565
CMK-1(V292A/V294A/W305S)	wt	90	28	0.650125
CMK-1(V292A/V294A/W305S)	wt	90	28	0.729421
CMK-1(V292A/V294A/W305S)	wt	90	28	0.71401
CMK-1(V292A/V294A/W305S)	wt	90	28	0.6349
CMK-1(V292A/V294A/W305S)	wt	90	28	0.67935
CMK-1(V292A/V294A/W305S)	wt	90	28	0.937668
CMK-1(V292A/V294A/W305S)	wt	90	20	0.963076
CMK-1(V292A/V294A/W305S)	wt	90	20	0.676546
CMK-1(V292A/V294A/W305S)	wt	90	20	0.831704
CMK-1(V292A/V294A/W305S)	wt	90	20	0.953878
CMK-1(V292A/V294A/W305S)	wt	90	20	0.951945
CMK-1(V292A/V294A/W305S)	wt	90	20	0.846113
CMK-1(V292A/V294A/W305S)	wt	90	20	1.12802
CMK-1(V292A/V294A/W305S)	wt	90	20	0.725777
CMK-1(V292A/V294A/W305S)	wt	90	20	0.729301
CMK-1(V292A/V294A/W305S)	wt	90	20	0.654299
CMK-1(V292A/V294A/W305S)	wt	90	20	0.585414
CMK-1(V292A/V294A/W305S)	wt	90	20	0.92735
CMK-1(V292A/V294A/W305S)	wt	90	20	0.914688
CMK-1(V292A/V294A/W305S)	wt	90	20	0.845775
CMK-1(V292A/V294A/W305S)	wt	90	20	0.929458
CMK-1(V292A/V294A/W305S)	wt	90	20	0.623425
CMK-1(V292A/V294A/W305S)	wt	90	20	0.899454
CMK-1(V292A/V294A/W305S)	wt	90	20	0.60017
CMK-1(V292A/V294A/W305S)	wt	90	20	1.04075
CMK-1(V292A/V294A/W305S)	wt	90	20	1.00143
CMK-1(V292A/V294A/W305S)	wt	90	28	0.76715
CMK-1(V292A/V294A/W305S)	wt	90	28	0.717552
CMK-1(V292A/V294A/W305S)	wt	90	28	0.767073
CMK-1(V292A/V294A/W305S)	wt	90	28	0.337797
CMK-1(V292A/V294A/W305S)	wt	90	28	0.655039
CMK-1(V292A/V294A/W305S)	wt	90	28	0.535307
CMK-1(V292A/V294A/W305S)	wt	90	28	0.474694
CMK-1(V292A/V294A/W305S)	wt	90	28	0.548864
CMK-1(V292A/V294A/W305S)	wt	90	28	0.555428
CMK-1(V292A/V294A/W305S)	wt	90	28	0.828073
CMK-1(V292A/V294A/W305S)	wt	90	28	1.08763
CMK-1(V292A/V294A/W305S)	wt	90	28	0.702795
CMK-1(V292A/V294A/W305S)	wt	90	28	1.13699
CMK-1(V292A/V294A/W305S)	wt	90	28	0.704503
CMK-1(V292A/V294A/W305S)	wt	90	28	0.757065
CMK-1(V292A/V294A/W305S)	wt	90	28	0.937417
CMK-1(V292A/V294A/W305S)	wt	90	28	0.816352
CMK-1(V292A/V294A/W305S)	wt	90	28	0.657874
CMK-1(V292A/V294A/W305S)	wt	90	28	0.722946
CMK-1(V292A/V294A/W305S)	wt	90	28	0.591533
CMK-1(V292A/V294A/W305S)	wt	90	28	0.767933
CMK-1(V292A/V294A/W305S)	wt	90	28	0.652147
CMK-1(V292A/V294A/W305S)	wt	90	28	0.784812
CMK-1(V292A/V294A/W305S)	wt	90	28	0.907521
CMK-1(V292A/V294A/W305S)	wt	90	28	0.734914
CMK-1(V292A/V294A/W305S)	wt	90	28	1.03153
CMK-1(V292A/V294A/W305S)	wt	90	28	0.82341
Raw data interaction between NES and unc-68 mutation
CMK-1 transgene	unc-68	Time (min)	Temperature (°C)	Ratio
CMK-1(wt)	wt	90	20	0.199462
CMK-1(wt)	wt	90	20	0.450712
CMK-1(wt)	wt	90	20	0.464293
CMK-1(wt)	wt	90	20	0.467442
CMK-1(wt)	wt	90	20	0.470685
CMK-1(wt)	wt	90	20	0.494694
CMK-1(wt)	wt	90	20	0.501777
CMK-1(wt)	wt	90	20	0.509095
CMK-1(wt)	wt	90	20	0.518977
CMK-1(wt)	wt	90	20	0.520431
CMK-1(wt)	wt	90	20	0.527006
CMK-1(wt)	wt	90	20	0.541806
CMK-1(wt)	wt	90	20	0.548841
CMK-1(wt)	wt	90	20	0.552094
CMK-1(wt)	wt	90	20	0.572984
CMK-1(wt)	wt	90	20	0.57306
CMK-1(wt)	wt	90	20	0.573966
CMK-1(wt)	wt	90	20	0.575471
CMK-1(wt)	wt	90	20	0.575808
CMK-1(wt)	wt	90	20	0.583067
CMK-1(wt)	wt	90	20	0.585446
CMK-1(wt)	wt	90	20	0.593547
CMK-1(wt)	wt	90	20	0.600012
CMK-1(wt)	wt	90	20	0.606093
CMK-1(wt)	wt	90	20	0.629307
CMK-1(wt)	wt	90	20	0.631583
CMK-1(wt)	wt	90	20	0.632171
CMK-1(wt)	wt	90	20	0.637596
CMK-1(wt)	wt	90	20	0.63901
CMK-1(wt)	wt	90	20	0.644371
CMK-1(wt)	wt	90	20	0.647934
CMK-1(wt)	wt	90	20	0.648099
CMK-1(wt)	wt	90	20	0.65276
CMK-1(wt)	wt	90	20	0.668996
CMK-1(wt)	wt	90	20	0.673165
CMK-1(wt)	wt	90	20	0.678486
CMK-1(wt)	wt	90	20	0.680095
CMK-1(wt)	wt	90	20	0.682584
CMK-1(wt)	wt	90	20	0.685648
CMK-1(wt)	wt	90	20	0.686846
CMK-1(wt)	wt	90	20	0.688527
CMK-1(wt)	wt	90	20	0.691767
CMK-1(wt)	wt	90	20	0.706276
CMK-1(wt)	wt	90	20	0.711561
CMK-1(wt)	wt	90	20	0.717632
CMK-1(wt)	wt	90	20	0.722055
CMK-1(wt)	wt	90	20	0.729688
CMK-1(wt)	wt	90	20	0.738782
CMK-1(wt)	wt	90	20	0.739158
CMK-1(wt)	wt	90	20	0.739716
CMK-1(wt)	wt	90	20	0.754001
CMK-1(wt)	wt	90	20	0.754358
CMK-1(wt)	wt	90	20	0.754881
CMK-1(wt)	wt	90	20	0.755726
CMK-1(wt)	wt	90	20	0.756858
CMK-1(wt)	wt	90	20	0.759254
CMK-1(wt)	wt	90	20	0.759306
CMK-1(wt)	wt	90	20	0.760756
CMK-1(wt)	wt	90	20	0.773151
CMK-1(wt)	wt	90	20	0.774622
CMK-1(wt)	wt	90	20	0.783562
CMK-1(wt)	wt	90	20	0.790815
CMK-1(wt)	wt	90	20	0.793379
CMK-1(wt)	wt	90	20	0.794424
CMK-1(wt)	wt	90	20	0.794666
CMK-1(wt)	wt	90	20	0.796845
CMK-1(wt)	wt	90	20	0.80241
CMK-1(wt)	wt	90	20	0.812898
CMK-1(wt)	wt	90	20	0.826959
CMK-1(wt)	wt	90	20	0.8286
CMK-1(wt)	wt	90	20	0.844117
CMK-1(wt)	wt	90	20	0.844748
CMK-1(wt)	wt	90	20	0.888731
CMK-1(wt)	wt	90	20	0.935567
CMK-1(wt)	wt	90	20	1.53348
CMK-1(wt)	dom13	90	20	0.127369
CMK-1(wt)	dom13	90	20	0.342146
CMK-1(wt)	dom13	90	20	0.365356
CMK-1(wt)	dom13	90	20	0.425949
CMK-1(wt)	dom13	90	20	0.447856
CMK-1(wt)	dom13	90	20	0.45342
CMK-1(wt)	dom13	90	20	0.478575
CMK-1(wt)	dom13	90	20	0.480208
CMK-1(wt)	dom13	90	20	0.482678
CMK-1(wt)	dom13	90	20	0.483579
CMK-1(wt)	dom13	90	20	0.495186
CMK-1(wt)	dom13	90	20	0.502895
CMK-1(wt)	dom13	90	20	0.510019
CMK-1(wt)	dom13	90	20	0.517905
CMK-1(wt)	dom13	90	20	0.523828
CMK-1(wt)	dom13	90	20	0.540231
CMK-1(wt)	dom13	90	20	0.556582
CMK-1(wt)	dom13	90	20	0.558412
CMK-1(wt)	dom13	90	20	0.621786
CMK-1(wt)	dom13	90	20	0.624212
CMK-1(wt)	dom13	90	20	0.637081
CMK-1(wt)	dom13	90	20	0.6387
CMK-1(wt)	dom13	90	20	0.648598
CMK-1(wt)	dom13	90	20	0.64967
CMK-1(wt)	dom13	90	20	0.651066
CMK-1(wt)	dom13	90	20	0.654085
[truncated: 2,440 more rows]
