# Supplementary material for: Ca2+/CaM binding to CaMKI promotes IMA-3 importin binding and nuclear translocation in sensory neurons to control behavioral adaptation
Source: eLife. 2021 Nov 12;10:e71443. doi: 10.7554/eLife.71443 (PMC8635976; doi:10.7554/eLife.71443)
Supplement: Figure 4—source data 1. [file elife-71443-fig4-data1.xlsx]

## Sheet: Figure 4-source data
Protein	conc (M)	Fraction bound
CMK-1(WT) -CaM	7.65e-06	0.91574
CMK-1(WT) -CaM	3.825e-06	0.791313
CMK-1(WT) -CaM	1.9125e-06	0.545511
CMK-1(WT) -CaM	9.5625e-07	0.255802
CMK-1(WT) -CaM	4.78125e-07	0.101544
CMK-1(WT) -CaM	2.39062e-07	0.0451689
CMK-1(WT) -CaM	1.19531e-07	0.0107739
CMK-1(WT) -CaM	5.97656e-08	0.0119101
CMK-1(WT) -CaM	2.98828e-08	-0.00140928
CMK-1(WT) -CaM	1.49414e-08	-0.000878335
CMK-1(WT) -CaM	7.4707e-09	0.00216134
CMK-1(WT) -CaM	3.73535e-09	0.000539634
CMK-1(WT) -CaM	1.86768e-09	-0.00508912
CMK-1(WT) -CaM	9.33838e-10	-0.00144188
CMK-1(WT) -CaM	4.66919e-10	-0.00724183
CMK-1(WT) -CaM	2.33459e-10	-0.00645409
CMK-1(WT) +CaM	6.12e-06	0.988766
CMK-1(WT) +CaM	3.27857e-06	0.956208
CMK-1(WT) +CaM	1.87347e-06	0.869905
CMK-1(WT) +CaM	1.07055e-06	0.741713
CMK-1(WT) +CaM	6.11745e-07	0.521062
CMK-1(WT) +CaM	3.49569e-07	0.366548
CMK-1(WT) +CaM	1.99754e-07	0.209971
CMK-1(WT) +CaM	1.14145e-07	0.106576
CMK-1(WT) +CaM	6.52256e-08	0.0584268
CMK-1(WT) +CaM	3.72718e-08	0.03159
CMK-1(WT) +CaM	2.12982e-08	0.0171402
CMK-1(WT) +CaM	1.21704e-08	-0.00872431
CMK-1(WT) +CaM	6.9545e-09	-0.0130074
CMK-1(WT) +CaM	3.974e-09	-0.00232061
CMK-1(WT) +CaM	2.27086e-09	-0.00675916
CMK-1(WT) +CaM	1.29763e-09	0
CMK-1(NLS triple) -CaM	5.75e-06	0.824939
CMK-1(NLS triple) -CaM	2.875e-06	0.677125
CMK-1(NLS triple) -CaM	1.4375e-06	0.482647
CMK-1(NLS triple) -CaM	7.1875e-07	0.260385
CMK-1(NLS triple) -CaM	3.59375e-07	0.16069
CMK-1(NLS triple) -CaM	1.79688e-07	0.0584198
CMK-1(NLS triple) -CaM	8.98438e-08	0.053624
CMK-1(NLS triple) -CaM	4.49219e-08	0.00899207
CMK-1(NLS triple) -CaM	2.24609e-08	0.00230721
CMK-1(NLS triple) -CaM	1.12305e-08	0.0115422
CMK-1(NLS triple) -CaM	5.61523e-09	-0.00743695
CMK-1(NLS triple) -CaM	2.80762e-09	-0.00170518
CMK-1(NLS triple) -CaM	1.40381e-09	-0.00118921
CMK-1(NLS triple) -CaM	7.01904e-10	-0.00133498
CMK-1(NLS triple) -CaM	3.50952e-10	-0.000663093
CMK-1(NLS triple) -CaM	1.75476e-10	-0.000658668
CMK-1(NLS triple) +CaM	2.46429e-06	0.702929
CMK-1(NLS triple) +CaM	1.40816e-06	0.529168
CMK-1(NLS triple) +CaM	8.04665e-07	0.388547
CMK-1(NLS triple) +CaM	8.57952e-08	0.0584366
CMK-1(NLS triple) +CaM	4.90258e-08	0.0463414
CMK-1(NLS triple) +CaM	2.80147e-08	0.0404556
CMK-1(NLS triple) +CaM	1.60084e-08	0.011102
CMK-1(NLS triple) +CaM	9.14767e-09	-0.000239887
CMK-1(NLS triple) +CaM	5.22724e-09	-0.0155484
CMK-1(NLS triple) +CaM	2.987e-09	-0.0221776
CMK-1(NLS triple) +CaM	1.70685e-09	-0.0243951
