# Supplementary material for: Ca2+/CaM binding to CaMKI promotes IMA-3 importin binding and nuclear translocation in sensory neurons to control behavioral adaptation
Source: eLife. 2021 Nov 12;10:e71443. doi: 10.7554/eLife.71443 (PMC8635976; doi:10.7554/eLife.71443)
Supplement: Figure 5—source data 1. [file elife-71443-fig5-data1.xlsx]

## Sheet: Figure 5-source data
Figure 5B
Genotype	Fraction of animal reversing (mean)	Fraction of animal reversing (sem)
cmk-1(wt)	0.240294	0.0223555
cmk-1(ok281)	0.424855	0.0425422
cmk-1(syb1435)	0.270093	0.0338672
cmk-1(syb1375)	0.106608	0.0251914
Figure 5C
Genotype	Incubation temperature (°C)	Reached temperature third quartile (mean)	Reached temperature third quartile (sem)
cmk-1(wt)	20	30.8878	0.0792225
cmk-1(ok287)	20	31.1113	0.0632677
cmk-1(syb1435)	20	31.0207	0.172325
cmk-1(wt)	28	31.6766	0.214909
cmk-1(ok287)	28	31.2803	0.134139
cmk-1(syb1435)	28	30.8292	0.101669
Figure 5D
Genotype	Light intensity (W/m2)	Fraction of light trials producing a reversal
cmk-1(wt)	30	0.375758
cmk-1(wt)	60	0.7
cmk-1(wt)	100	0.884848
cmk-1(wt)	200	0.922222
cmk-1(syb1375)	30	0.155556
cmk-1(syb1375)	60	0.388889
cmk-1(syb1375)	100	0.422222
cmk-1(syb1375)	200	0.733333
cmk-1(syb1435)	30	0.444444
cmk-1(syb1435)	60	0.644444
cmk-1(syb1435)	100	0.877778
cmk-1(syb1435)	200	0.966667
Figure 5E
Mutation	Rescue	Number of responded trials	Number of unresponded trials
cmk-1(wt)	none	404	97
cmk-1(syb1375)	none	453	558
cmk-1(syb1375)	with cmk-1p	355	128
cmk-1(syb1375)	with mec-3p	354	138
Figure 5F
Mutation	Treatment	Number of responded trials	Number of unresponded trials
cmk-1(wt)	naïve	289	86
cmk-1(wt)	adapted	216	138
cmk-1(syb1435)	naïve	335	85
cmk-1(syb1435)	adapted	283	104
