# Supplementary material for: Ca2+/CaM binding to CaMKI promotes IMA-3 importin binding and nuclear translocation in sensory neurons to control behavioral adaptation
Source: eLife. 2021 Nov 12;10:e71443. doi: 10.7554/eLife.71443 (PMC8635976; doi:10.7554/eLife.71443)
Supplement: Figure 6—source data 1. [file elife-71443-fig6-data1.xlsx]

## Sheet: Figure 6-source data
Figure 6B
CMK-1 transgene	Temperature (°C)	Ratio (Mean)	Ratio (sem)
CMK-1(wt)	15	1.50041	0.0328672
CMK-1(V292A/V294A)	15	1.65149	0.0346214
CMK-1(K71A/R74Q/R77S)	15	1.19991	0.0300638
CMK-1(W305S)	15	0.750821	0.0234479
CMK-1(wt)	25	0.840004	0.0123675
CMK-1(V292A/V294A)	25	1.39589	0.026821
CMK-1(K71A/R74Q/R77S)	25	0.743993	0.00929158
CMK-1(W305S)	25	0.688662	0.0127853
Figure 6C
CMK-1 transgene	unc-68 allele	Temperature (°C)	Ratio (Mean)	Ratio (sem)
CMK-1(wt)	unc-68(wt)	15	1.50041	0.0328672
CMK-1(wt)	unc-68(dom13)	15	1.47088	0.0305602
CMK-1(wt)	unc-68(wt)	15	0.750821	0.0234479
CMK-1(wt)	unc-68(dom13)	15	0.612203	0.0218519
CMK-1(wt)	unc-68(wt)	25	0.840004	0.0123675
CMK-1(wt)	unc-68(dom13)	25	1.1313	0.022217
CMK-1(wt)	unc-68(wt)	25	0.688662	0.0127853
CMK-1(wt)	unc-68(dom13)	25	0.674912	0.0163177
Figure 6D
Stimulation protocol	time (s)	YFP/CFP (mean)	YFP/CFP (sem)
15°C to 25°C	1	1.084	0.0430263
15°C to 25°C	2	1.08214	0.0426146
15°C to 25°C	3	1.08278	0.0426064
15°C to 25°C	4	1.08081	0.0427868
15°C to 25°C	5	1.08211	0.0428703
15°C to 25°C	6	1.08246	0.0432227
15°C to 25°C	7	1.0839	0.042995
15°C to 25°C	8	1.0836	0.0426433
15°C to 25°C	9	1.08428	0.0431143
15°C to 25°C	10	1.08494	0.0430749
15°C to 25°C	11	1.083	0.0425924
15°C to 25°C	12	1.08273	0.0425781
15°C to 25°C	13	1.08215	0.0421014
15°C to 25°C	14	1.08392	0.0428233
15°C to 25°C	15	1.08177	0.0428773
15°C to 25°C	16	1.08285	0.0427984
15°C to 25°C	17	1.08347	0.0423537
15°C to 25°C	18	1.08429	0.0421744
15°C to 25°C	19	1.08529	0.0426133
15°C to 25°C	20	1.08323	0.0420365
15°C to 25°C	21	1.08559	0.0426331
15°C to 25°C	22	1.08419	0.0422868
15°C to 25°C	23	1.08838	0.0429785
15°C to 25°C	24	1.0877	0.0425762
15°C to 25°C	25	1.08692	0.0424318
15°C to 25°C	26	1.08612	0.0423542
15°C to 25°C	27	1.08689	0.0422675
15°C to 25°C	28	1.08643	0.042233
15°C to 25°C	29	1.08672	0.0422624
15°C to 25°C	30	1.08698	0.0425915
15°C to 25°C	31	1.08734	0.0424204
15°C to 25°C	32	1.08486	0.0414306
15°C to 25°C	33	1.08711	0.0424888
15°C to 25°C	34	1.0865	0.0425606
15°C to 25°C	35	1.0872	0.0424724
15°C to 25°C	36	1.08882	0.0430262
15°C to 25°C	37	1.08582	0.0417355
15°C to 25°C	38	1.08948	0.0427348
15°C to 25°C	39	1.09054	0.0427471
15°C to 25°C	40	1.0914	0.0425779
15°C to 25°C	41	1.09108	0.042769
15°C to 25°C	42	1.09025	0.0422464
15°C to 25°C	43	1.09018	0.0421895
15°C to 25°C	44	1.08954	0.0420849
15°C to 25°C	45	1.09409	0.0423607
15°C to 25°C	46	1.08807	0.0412072
15°C to 25°C	47	1.09412	0.0427523
15°C to 25°C	48	1.09015	0.0416832
15°C to 25°C	49	1.09045	0.0412576
15°C to 25°C	50	1.09163	0.0420364
15°C to 25°C	51	1.09082	0.0409876
15°C to 25°C	52	1.09211	0.0418455
15°C to 25°C	53	1.09324	0.0415762
15°C to 25°C	54	1.09094	0.0411851
15°C to 25°C	55	1.09388	0.041787
15°C to 25°C	56	1.0928	0.0409212
15°C to 25°C	57	1.09184	0.0415305
15°C to 25°C	58	1.09476	0.0414353
15°C to 25°C	59	1.09569	0.0418175
15°C to 25°C	60	1.09397	0.040265
15°C to 25°C	61	1.09696	0.0411469
15°C to 25°C	62	1.10994	0.041991
15°C to 25°C	63	1.10339	0.0405637
15°C to 25°C	64	1.11445	0.0402027
15°C to 25°C	65	1.08839	0.0438261
15°C to 25°C	66	1.10776	0.039288
15°C to 25°C	67	1.1204	0.0388306
15°C to 25°C	68	1.12806	0.0382829
15°C to 25°C	69	1.14391	0.0396092
15°C to 25°C	70	1.14305	0.0394402
15°C to 25°C	71	1.15121	0.0403688
15°C to 25°C	72	1.16176	0.0412847
15°C to 25°C	73	1.15317	0.041086
15°C to 25°C	74	1.15705	0.0416903
15°C to 25°C	75	1.1597	0.0422897
15°C to 25°C	76	1.16203	0.0410231
15°C to 25°C	77	1.16613	0.0418226
15°C to 25°C	78	1.17056	0.0423219
15°C to 25°C	79	1.17489	0.0426094
15°C to 25°C	80	1.18006	0.0430618
15°C to 25°C	81	1.1818	0.0426536
15°C to 25°C	82	1.18445	0.043498
15°C to 25°C	83	1.186	0.0433792
15°C to 25°C	84	1.19327	0.044426
15°C to 25°C	85	1.19346	0.0440969
15°C to 25°C	86	1.19362	0.0443687
15°C to 25°C	87	1.1977	0.0444727
15°C to 25°C	88	1.19704	0.0442052
15°C to 25°C	89	1.19673	0.0450006
15°C to 25°C	90	1.19852	0.0447544
15°C to 25°C	91	1.19931	0.0440242
15°C to 25°C	92	1.19886	0.0445646
15°C to 25°C	93	1.20175	0.0447108
15°C to 25°C	94	1.2059	0.044872
15°C to 25°C	95	1.20173	0.0450536
15°C to 25°C	96	1.20551	0.0456227
15°C to 25°C	97	1.20463	0.0448999
15°C to 25°C	98	1.20327	0.0450056
15°C to 25°C	99	1.20496	0.0457073
15°C to 25°C	100	1.20565	0.0456768
15°C to 25°C	101	1.20439	0.0453776
15°C to 25°C	102	1.20162	0.0457267
15°C to 25°C	103	1.20478	0.0461419
15°C to 25°C	104	1.20313	0.0461463
15°C to 25°C	105	1.2024	0.0461119
15°C to 25°C	106	1.20397	0.0461295
15°C to 25°C	107	1.2026	0.0454141
15°C to 25°C	108	1.203	0.0463656
15°C to 25°C	109	1.20229	0.0464466
15°C to 25°C	110	1.20295	0.0463433
15°C to 25°C	111	1.20264	0.046405
15°C to 25°C	112	1.20214	0.0471931
15°C to 25°C	113	1.2004	0.04658
15°C to 25°C	114	1.20198	0.0471325
15°C to 25°C	115	1.20182	0.0459168
15°C to 25°C	116	1.19856	0.0469772
15°C to 25°C	117	1.20046	0.0470215
15°C to 25°C	118	1.19933	0.0479966
15°C to 25°C	119	1.20148	0.0476327
15°C to 25°C	120	1.20272	0.0471436
15°C to 25°C	121	1.19919	0.0478196
15°C to 25°C	122	1.19861	0.0477515
15°C to 25°C	123	1.19653	0.0480167
15°C to 25°C	124	1.19709	0.0475755
15°C to 25°C	125	1.19694	0.0486295
15°C to 25°C	126	1.19495	0.0488575
15°C to 25°C	127	1.19684	0.0483891
15°C to 25°C	128	1.19417	0.0479381
15°C to 25°C	129	1.19453	0.0486449
15°C to 25°C	130	1.19765	0.0488933
15°C to 25°C	131	1.19473	0.0479262
15°C to 25°C	132	1.19301	0.0479459
15°C to 25°C	133	1.19079	0.0480245
15°C to 25°C	134	1.18843	0.0478912
15°C to 25°C	135	1.1914	0.0481319
15°C to 25°C	136	1.19037	0.0486173
15°C to 25°C	137	1.19272	0.048807
15°C to 25°C	138	1.1922	0.0481216
15°C to 25°C	139	1.18882	0.0483288
15°C to 25°C	140	1.18849	0.0479772
15°C to 25°C	141	1.18644	0.0492326
15°C to 25°C	142	1.18596	0.0484202
15°C to 25°C	143	1.19031	0.0483059
15°C to 25°C	144	1.18679	0.048066
15°C to 25°C	145	1.18886	0.048647
15°C to 25°C	146	1.18962	0.0484477
15°C to 25°C	147	1.18973	0.0491804
15°C to 25°C	148	1.18874	0.0492973
15°C to 25°C	149	1.18526	0.0476306
15°C to 25°C	150	1.18182	0.0460958
15°C to 25°C	151	1.18034	0.0462635
15°C to 25°C	152	1.17963	0.0459819
15°C to 25°C	153	1.17848	0.0456275
15°C to 25°C	154	1.18261	0.0460167
15°C to 25°C	155	1.17703	0.0454286
15°C to 25°C	156	1.17408	0.0458079
15°C to 25°C	157	1.17188	0.0457591
15°C to 25°C	158	1.17355	0.0460273
15°C to 25°C	159	1.17404	0.0463082
15°C to 25°C	160	1.17499	0.0462314
15°C to 25°C	161	1.17512	0.0468492
15°C to 25°C	162	1.17614	0.0463426
15°C to 25°C	163	1.1716	0.0461619
15°C to 25°C	164	1.17414	0.0466267
15°C to 25°C	165	1.174	0.0467775
15°C to 25°C	166	1.16839	0.0451217
15°C to 25°C	167	1.16997	0.0471048
15°C to 25°C	168	1.17383	0.0468184
15°C to 25°C	169	1.16985	0.0458095
15°C to 25°C	170	1.17195	0.0462937
15°C to 25°C	171	1.17028	0.0459083
15°C to 25°C	172	1.17296	0.0456255
15°C to 25°C	173	1.17313	0.0452971
15°C to 25°C	174	1.17356	0.0464865
15°C to 25°C	175	1.17339	0.0456634
15°C to 25°C	176	1.17397	0.0459006
15°C to 25°C	177	1.17022	0.044895
15°C to 25°C	178	1.17035	0.0456598
15°C to 25°C	179	1.17333	0.0461281
15°C to 25°C	180	1.16912	0.045676
15°C to 25°C	181	1.1694	0.0469443
15°C to 25°C	182	1.16589	0.0459093
15°C to 25°C	183	1.16343	0.0465943
15°C to 25°C	184	1.1624	0.0468851
15°C to 25°C	185	1.15133	0.0440927
15°C to 25°C	186	1.16872	0.0487888
15°C to 25°C	187	1.17433	0.0505217
15°C to 25°C	188	1.16837	0.0497169
15°C to 25°C	189	1.16468	0.0508224
15°C to 25°C	190	1.16347	0.0484439
15°C to 25°C	191	1.15729	0.0475039
15°C to 25°C	192	1.15591	0.0480362
15°C to 25°C	193	1.15428	0.0474919
15°C to 25°C	194	1.15197	0.0479126
15°C to 25°C	195	1.15069	0.0469997
15°C to 25°C	196	1.14722	0.0476721
15°C to 25°C	197	1.14303	0.0482537
15°C to 25°C	198	1.14172	0.0481338
15°C to 25°C	199	1.13742	0.0475172
15°C to 25°C	200	1.13703	0.0484661
15°C to 25°C	201	1.13166	0.0478392
15°C to 25°C	202	1.132	0.0485295
15°C to 25°C	203	1.12941	0.0478568
15°C to 25°C	204	1.12742	0.0482856
15°C to 25°C	205	1.12585	0.0477024
15°C to 25°C	206	1.12363	0.0482737
15°C to 25°C	207	1.12191	0.0486962
15°C to 25°C	208	1.11919	0.0483375
15°C to 25°C	209	1.11513	0.047812
15°C to 25°C	210	1.11726	0.0488901
15°C to 25°C	211	1.11424	0.0477484
15°C to 25°C	212	1.11325	0.0479185
15°C to 25°C	213	1.11019	0.0474898
15°C to 25°C	214	1.11005	0.0483364
15°C to 25°C	215	1.1088	0.0476357
15°C to 25°C	216	1.1052	0.0479159
15°C to 25°C	217	1.10491	0.0485095
15°C to 25°C	218	1.10406	0.048505
15°C to 25°C	219	1.10127	0.0484042
15°C to 25°C	220	1.10144	0.0483759
15°C to 25°C	221	1.09765	0.0482898
15°C to 25°C	222	1.09742	0.0483872
15°C to 25°C	223	1.09714	0.0485469
15°C to 25°C	224	1.09654	0.049309
15°C to 25°C	225	1.10009	0.049633
15°C to 25°C	226	1.093	0.048368
15°C to 25°C	227	1.09153	0.0479791
15°C to 25°C	228	1.09233	0.0477583
15°C to 25°C	229	1.09159	0.0478939
15°C to 25°C	230	1.09072	0.0481869
15°C to 25°C	231	1.09119	0.0486395
15°C to 25°C	232	1.08946	0.0488938
15°C to 25°C	233	1.09121	0.048165
15°C to 25°C	234	1.08664	0.047405
15°C to 25°C	235	1.08812	0.0480139
15°C to 25°C	236	1.0874	0.0479903
15°C to 25°C	237	1.0846	0.0474471
15°C to 25°C	238	1.08362	0.0477261
15°C to 25°C	239	1.08491	0.0476325
15°C to 25°C	240	1.08638	0.0483283
15°C to 25°C	241	1.0827	0.046928
15°C to 25°C	242	1.07808	0.0458723
15°C to 25°C	243	1.08441	0.0475093
15°C to 25°C	244	1.08244	0.0477371
15°C to 25°C	245	1.08234	0.0474222
15°C to 25°C	246	1.0808	0.0472411
15°C to 25°C	247	1.07891	0.0468662
15°C to 25°C	248	1.0788	0.0469945
15°C to 25°C	249	1.08112	0.0478222
15°C to 25°C	250	1.08036	0.0481061
25°C to 15°C	1	0.932641	0.0623494
25°C to 15°C	2	0.928499	0.060698
25°C to 15°C	3	0.930941	0.0607063
25°C to 15°C	4	0.928648	0.0607887
25°C to 15°C	5	0.92877	0.060728
25°C to 15°C	6	0.927498	0.06046
25°C to 15°C	7	0.928332	0.0605268
25°C to 15°C	8	0.930923	0.0617544
25°C to 15°C	9	0.931453	0.0611401
25°C to 15°C	10	0.929908	0.0607984
25°C to 15°C	11	0.931459	0.0616658
25°C to 15°C	12	0.926184	0.0595511
25°C to 15°C	13	0.927981	0.0610698
25°C to 15°C	14	0.928516	0.0608104
25°C to 15°C	15	0.927017	0.0606985
25°C to 15°C	16	0.927558	0.0605951
25°C to 15°C	17	0.929185	0.0610261
25°C to 15°C	18	0.92799	0.0606423
25°C to 15°C	19	0.930968	0.0614557
25°C to 15°C	20	0.928448	0.0609788
25°C to 15°C	21	0.927499	0.0602141
25°C to 15°C	22	0.927745	0.0606837
25°C to 15°C	23	0.925016	0.0606658
25°C to 15°C	24	0.923877	0.0602024
25°C to 15°C	25	0.926342	0.0598842
25°C to 15°C	26	0.923399	0.0595291
25°C to 15°C	27	0.924158	0.0598894
25°C to 15°C	28	0.920507	0.0581115
25°C to 15°C	29	0.925201	0.059522
25°C to 15°C	30	0.922634	0.0588044
25°C to 15°C	31	0.921871	0.0585849
25°C to 15°C	32	0.92132	0.0590575
25°C to 15°C	33	0.923162	0.0591585
25°C to 15°C	34	0.921622	0.058728
25°C to 15°C	35	0.921139	0.0583025
25°C to 15°C	36	0.919597	0.0586507
25°C to 15°C	37	0.92016	0.0582398
25°C to 15°C	38	0.920425	0.0582294
25°C to 15°C	39	0.923733	0.0587484
25°C to 15°C	40	0.919038	0.0577254
25°C to 15°C	41	0.920814	0.0585035
25°C to 15°C	42	0.919316	0.058523
25°C to 15°C	43	0.919853	0.0584685
25°C to 15°C	44	0.918783	0.057555
25°C to 15°C	45	0.919239	0.0582945
25°C to 15°C	46	0.917052	0.0575695
25°C to 15°C	47	0.92083	0.0587055
25°C to 15°C	48	0.918562	0.0580198
25°C to 15°C	49	0.917203	0.0574974
25°C to 15°C	50	0.917176	0.0576192
25°C to 15°C	51	0.917511	0.0564434
25°C to 15°C	52	0.915375	0.0571249
25°C to 15°C	53	0.916271	0.0566746
25°C to 15°C	54	0.915305	0.0572331
25°C to 15°C	55	0.919043	0.0576155
25°C to 15°C	56	0.915915	0.0572523
25°C to 15°C	57	0.915978	0.0570281
25°C to 15°C	58	0.916263	0.0572441
25°C to 15°C	59	0.915098	0.057366
25°C to 15°C	60	0.915166	0.0572997
25°C to 15°C	61	0.914852	0.0570401
25°C to 15°C	62	0.913266	0.0565273
25°C to 15°C	63	0.91333	0.0571497
25°C to 15°C	64	0.910611	0.0579125
25°C to 15°C	65	0.919009	0.0559772
25°C to 15°C	66	0.913999	0.0572512
25°C to 15°C	67	0.912492	0.0573207
25°C to 15°C	68	0.913161	0.0585303
25°C to 15°C	69	0.90185	0.0583467
25°C to 15°C	70	0.898672	0.0580375
25°C to 15°C	71	0.903876	0.0590659
25°C to 15°C	72	0.901904	0.0584159
25°C to 15°C	73	0.900843	0.0575937
25°C to 15°C	74	0.895363	0.057443
25°C to 15°C	75	0.894723	0.0590985
25°C to 15°C	76	0.890959	0.0585974
25°C to 15°C	77	0.889589	0.0598274
25°C to 15°C	78	0.885981	0.0592062
25°C to 15°C	79	0.881135	0.0596432
25°C to 15°C	80	0.87833	0.0588634
25°C to 15°C	81	0.87803	0.0603017
25°C to 15°C	82	0.875932	0.0593228
25°C to 15°C	83	0.870146	0.0588274
25°C to 15°C	84	0.867341	0.0582908
25°C to 15°C	85	0.865221	0.0578589
25°C to 15°C	86	0.862793	0.0585941
25°C to 15°C	87	0.862954	0.0575894
25°C to 15°C	88	0.860863	0.0582843
25°C to 15°C	89	0.859187	0.0582181
25°C to 15°C	90	0.857831	0.0579932
25°C to 15°C	91	0.854589	0.0572361
25°C to 15°C	92	0.852083	0.0582607
25°C to 15°C	93	0.851259	0.0582267
25°C to 15°C	94	0.849543	0.0585953
25°C to 15°C	95	0.848332	0.0588562
25°C to 15°C	96	0.844637	0.058483
25°C to 15°C	97	0.843272	0.0582111
25°C to 15°C	98	0.841712	0.0581014
25°C to 15°C	99	0.840211	0.0577203
25°C to 15°C	100	0.839248	0.0577036
25°C to 15°C	101	0.837926	0.0577362
25°C to 15°C	102	0.837233	0.058047
25°C to 15°C	103	0.83727	0.0572038
25°C to 15°C	104	0.834915	0.0571391
25°C to 15°C	105	0.835796	0.0571494
25°C to 15°C	106	0.833785	0.0571038
25°C to 15°C	107	0.833686	0.05701
25°C to 15°C	108	0.832494	0.0571181
25°C to 15°C	109	0.830229	0.0569225
25°C to 15°C	110	0.830544	0.0567469
25°C to 15°C	111	0.828406	0.0566528
25°C to 15°C	112	0.827891	0.05639
25°C to 15°C	113	0.826183	0.0562561
25°C to 15°C	114	0.824859	0.0561798
25°C to 15°C	115	0.824949	0.0564025
25°C to 15°C	116	0.824065	0.0561125
25°C to 15°C	117	0.824034	0.056138
25°C to 15°C	118	0.823451	0.0562464
25°C to 15°C	119	0.820516	0.0565708
25°C to 15°C	120	0.821213	0.0563937
25°C to 15°C	121	0.820407	0.0563235
25°C to 15°C	122	0.818644	0.0558607
25°C to 15°C	123	0.817969	0.0556984
25°C to 15°C	124	0.81766	0.0557966
25°C to 15°C	125	0.817986	0.0557946
25°C to 15°C	126	0.817896	0.0558179
25°C to 15°C	127	0.817232	0.0555242
25°C to 15°C	128	0.816206	0.0558647
25°C to 15°C	129	0.816843	0.0559175
25°C to 15°C	130	0.816578	0.0553512
25°C to 15°C	131	0.815401	0.0555752
25°C to 15°C	132	0.815928	0.0552338
25°C to 15°C	133	0.814973	0.0552714
25°C to 15°C	134	0.813948	0.0553117
25°C to 15°C	135	0.815491	0.0550707
25°C to 15°C	136	0.813584	0.0550919
25°C to 15°C	137	0.814879	0.055197
25°C to 15°C	138	0.814443	0.0551691
25°C to 15°C	139	0.814223	0.0545782
25°C to 15°C	140	0.814413	0.0549452
25°C to 15°C	141	0.814068	0.0552274
25°C to 15°C	142	0.813906	0.0551272
25°C to 15°C	143	0.814218	0.0546789
25°C to 15°C	144	0.813755	0.0547177
25°C to 15°C	145	0.81196	0.0545831
25°C to 15°C	146	0.813174	0.0539443
25°C to 15°C	147	0.813809	0.054949
25°C to 15°C	148	0.813001	0.0544229
25°C to 15°C	149	0.812808	0.0541799
25°C to 15°C	150	0.813196	0.054335
25°C to 15°C	151	0.81236	0.0541
25°C to 15°C	152	0.812357	0.0539047
25°C to 15°C	153	0.812152	0.0536025
25°C to 15°C	154	0.812842	0.0538843
25°C to 15°C	155	0.81303	0.0538223
25°C to 15°C	156	0.813752	0.0535181
25°C to 15°C	157	0.815245	0.0530469
25°C to 15°C	158	0.822122	0.0518209
25°C to 15°C	159	0.815352	0.0531061
25°C to 15°C	160	0.812306	0.0535108
25°C to 15°C	161	0.812229	0.0535168
25°C to 15°C	162	0.812048	0.0535194
25°C to 15°C	163	0.812996	0.0536901
25°C to 15°C	164	0.813323	0.0533771
25°C to 15°C	165	0.811121	0.053323
25°C to 15°C	166	0.812825	0.0535843
25°C to 15°C	167	0.812912	0.0532867
25°C to 15°C	168	0.813582	0.053211
25°C to 15°C	169	0.813617	0.0531186
25°C to 15°C	170	0.814062	0.0528679
25°C to 15°C	171	0.812978	0.0528296
25°C to 15°C	172	0.813504	0.0529185
25°C to 15°C	173	0.81414	0.0528675
25°C to 15°C	174	0.814469	0.052466
25°C to 15°C	175	0.813303	0.0526411
25°C to 15°C	176	0.813197	0.0530121
25°C to 15°C	177	0.8136	0.0530063
25°C to 15°C	178	0.814434	0.0529243
25°C to 15°C	179	0.81395	0.0520967
25°C to 15°C	180	0.814614	0.0523064
25°C to 15°C	181	0.820394	0.0524967
25°C to 15°C	182	0.822554	0.0519199
25°C to 15°C	183	0.821685	0.052304
25°C to 15°C	184	0.821274	0.0525581
25°C to 15°C	185	0.82442	0.0521649
25°C to 15°C	186	0.824868	0.0512945
25°C to 15°C	187	0.824215	0.0516178
25°C to 15°C	188	0.82371	0.0507932
25°C to 15°C	189	0.826464	0.0506382
25°C to 15°C	190	0.831054	0.0516196
25°C to 15°C	191	0.832571	0.049777
25°C to 15°C	192	0.833538	0.0501797
25°C to 15°C	193	0.844545	0.0505567
25°C to 15°C	194	0.85073	0.0503597
25°C to 15°C	195	0.856047	0.0503
25°C to 15°C	196	0.859766	0.0500223
25°C to 15°C	197	0.861117	0.0497935
25°C to 15°C	198	0.86864	0.0499611
25°C to 15°C	199	0.875034	0.05039
25°C to 15°C	200	0.877624	0.0496101
25°C to 15°C	201	0.879696	0.049632
25°C to 15°C	202	0.884051	0.0495254
25°C to 15°C	203	0.886018	0.0495451
25°C to 15°C	204	0.890265	0.0495379
25°C to 15°C	205	0.893659	0.0488198
25°C to 15°C	206	0.895294	0.0487255
25°C to 15°C	207	0.897378	0.0490369
25°C to 15°C	208	0.902277	0.0494816
25°C to 15°C	209	0.902422	0.0489784
25°C to 15°C	210	0.90192	0.048574
25°C to 15°C	211	0.906771	0.0489268
25°C to 15°C	212	0.908542	0.0491802
25°C to 15°C	213	0.911653	0.0490327
25°C to 15°C	214	0.911393	0.0484884
25°C to 15°C	215	0.914621	0.0486431
25°C to 15°C	216	0.915394	0.0488092
25°C to 15°C	217	0.917611	0.0486921
25°C to 15°C	218	0.914983	0.0475709
25°C to 15°C	219	0.917626	0.0482159
25°C to 15°C	220	0.918308	0.0486123
25°C to 15°C	221	0.919604	0.0493794
25°C to 15°C	222	0.921257	0.0491098
25°C to 15°C	223	0.92166	0.0492812
25°C to 15°C	224	0.923331	0.0490011
25°C to 15°C	225	0.923496	0.0488091
25°C to 15°C	226	0.923574	0.0481837
25°C to 15°C	227	0.924278	0.0488004
25°C to 15°C	228	0.923363	0.0487044
25°C to 15°C	229	0.922589	0.0493115
25°C to 15°C	230	0.926013	0.048727
25°C to 15°C	231	0.925501	0.0487732
25°C to 15°C	232	0.924785	0.0482208
25°C to 15°C	233	0.925662	0.047967
25°C to 15°C	234	0.929772	0.0496147
25°C to 15°C	235	0.931258	0.0494704
25°C to 15°C	236	0.928943	0.0486781
25°C to 15°C	237	0.928277	0.0479555
25°C to 15°C	238	0.929261	0.0481941
25°C to 15°C	239	0.930596	0.0478345
25°C to 15°C	240	0.928206	0.0476375
25°C to 15°C	241	0.931192	0.0473435
25°C to 15°C	242	0.931731	0.0481815
25°C to 15°C	243	0.931796	0.0475298
25°C to 15°C	244	0.930341	0.0474765
25°C to 15°C	245	0.929911	0.0468897
25°C to 15°C	246	0.930595	0.0469578
25°C to 15°C	247	0.930698	0.0473504
25°C to 15°C	248	0.931045	0.0466862
25°C to 15°C	249	0.931128	0.0474671
25°C to 15°C	250	0.930578	0.0467473
Figure 6G
Genotype	Thermotaxis index (mean)	Thermotaxis index (sem)
cmk-1(wt)	-0.731082	-0.0303702
cmk-1(ok278)	-0.254919	-0.039627
cmk-1(syb1375)	-0.417863	-0.0587215
cmk-1(syb1435)	-0.68818	-0.0375613
Figure 6I
Genotype	Temperature (°C)	[gcy-8p::GFP] reporter signal (arbitrary units) mean	[gcy-8p::GFP] reporter signal (arbitrary units) sem
cmk-1(wt)	15	88.9	3.08
cmk-1(ok287)	15	27.5	1.16
cmk-1(1375)	15	107	2.31
cmk-1(1435)	15	106	2
cmk-1(wt)	25	109	2.4
cmk-1(ok287)	25	12.3	0.937
cmk-1(1375)	25	104	2.08
cmk-1(1435)	25	110	1.94
Raw data Figure 6B
CMK-1 transgene	Temperature (°C)	Ratio
CMK-1(K71A/R74Q/R77S)	15	0.234273
CMK-1(K71A/R74Q/R77S)	15	0.244487
CMK-1(K71A/R74Q/R77S)	15	0.417518
CMK-1(K71A/R74Q/R77S)	15	0.43287
CMK-1(K71A/R74Q/R77S)	15	0.47558
CMK-1(K71A/R74Q/R77S)	15	0.487358
CMK-1(K71A/R74Q/R77S)	15	0.500375
CMK-1(K71A/R74Q/R77S)	15	0.509404
CMK-1(K71A/R74Q/R77S)	15	0.533933
CMK-1(K71A/R74Q/R77S)	15	0.541052
CMK-1(K71A/R74Q/R77S)	15	0.548028
CMK-1(K71A/R74Q/R77S)	15	0.552085
CMK-1(K71A/R74Q/R77S)	15	0.570006
CMK-1(K71A/R74Q/R77S)	15	0.582593
CMK-1(K71A/R74Q/R77S)	15	0.583515
CMK-1(K71A/R74Q/R77S)	15	0.596985
CMK-1(K71A/R74Q/R77S)	15	0.608966
CMK-1(K71A/R74Q/R77S)	15	0.629721
CMK-1(K71A/R74Q/R77S)	15	0.659992
CMK-1(K71A/R74Q/R77S)	15	0.681333
CMK-1(K71A/R74Q/R77S)	15	0.686294
CMK-1(K71A/R74Q/R77S)	15	0.694399
CMK-1(K71A/R74Q/R77S)	15	0.704131
CMK-1(K71A/R74Q/R77S)	15	0.743437
CMK-1(K71A/R74Q/R77S)	15	0.75455
CMK-1(K71A/R74Q/R77S)	15	0.779118
CMK-1(K71A/R74Q/R77S)	15	0.805066
CMK-1(K71A/R74Q/R77S)	15	0.810181
CMK-1(K71A/R74Q/R77S)	15	0.819783
CMK-1(K71A/R74Q/R77S)	15	0.819802
CMK-1(K71A/R74Q/R77S)	15	0.828173
CMK-1(K71A/R74Q/R77S)	15	0.856478
CMK-1(K71A/R74Q/R77S)	15	0.880895
CMK-1(K71A/R74Q/R77S)	15	0.928759
CMK-1(K71A/R74Q/R77S)	15	0.931883
CMK-1(K71A/R74Q/R77S)	15	0.947704
CMK-1(K71A/R74Q/R77S)	15	0.952613
CMK-1(K71A/R74Q/R77S)	15	0.979482
CMK-1(K71A/R74Q/R77S)	15	0.987032
CMK-1(K71A/R74Q/R77S)	15	0.99632
CMK-1(K71A/R74Q/R77S)	15	1
CMK-1(K71A/R74Q/R77S)	15	1.02235
CMK-1(K71A/R74Q/R77S)	15	1.0242
CMK-1(K71A/R74Q/R77S)	15	1.03447
CMK-1(K71A/R74Q/R77S)	15	1.03552
CMK-1(K71A/R74Q/R77S)	15	1.04563
CMK-1(K71A/R74Q/R77S)	15	1.05968
CMK-1(K71A/R74Q/R77S)	15	1.13208
CMK-1(K71A/R74Q/R77S)	15	1.13352
CMK-1(K71A/R74Q/R77S)	15	1.136
CMK-1(K71A/R74Q/R77S)	15	1.14169
CMK-1(K71A/R74Q/R77S)	15	1.18683
CMK-1(K71A/R74Q/R77S)	15	1.19193
CMK-1(K71A/R74Q/R77S)	15	1.19209
CMK-1(K71A/R74Q/R77S)	15	1.19712
CMK-1(K71A/R74Q/R77S)	15	1.22548
CMK-1(K71A/R74Q/R77S)	15	1.23758
CMK-1(K71A/R74Q/R77S)	15	1.23788
CMK-1(K71A/R74Q/R77S)	15	1.24068
CMK-1(K71A/R74Q/R77S)	15	1.26697
CMK-1(K71A/R74Q/R77S)	15	1.29369
CMK-1(K71A/R74Q/R77S)	15	1.319
CMK-1(K71A/R74Q/R77S)	15	1.34244
CMK-1(K71A/R74Q/R77S)	15	1.34924
CMK-1(K71A/R74Q/R77S)	15	1.36768
CMK-1(K71A/R74Q/R77S)	15	1.37741
CMK-1(K71A/R74Q/R77S)	15	1.3958
CMK-1(K71A/R74Q/R77S)	15	1.42219
CMK-1(K71A/R74Q/R77S)	15	1.42652
CMK-1(K71A/R74Q/R77S)	15	1.46559
CMK-1(K71A/R74Q/R77S)	15	1.53673
CMK-1(K71A/R74Q/R77S)	15	1.54106
CMK-1(K71A/R74Q/R77S)	15	1.54892
CMK-1(K71A/R74Q/R77S)	15	1.54944
CMK-1(K71A/R74Q/R77S)	15	1.5911
CMK-1(K71A/R74Q/R77S)	15	1.64594
CMK-1(K71A/R74Q/R77S)	15	1.96373
CMK-1(K71A/R74Q/R77S)	15	2.33503
CMK-1(K71A/R74Q/R77S)	15	2.53021
CMK-1(K71A/R74Q/R77S)	15	3.18519
CMK-1(K71A/R74Q/R77S)	25	0.290815
CMK-1(K71A/R74Q/R77S)	25	0.320643
CMK-1(K71A/R74Q/R77S)	25	0.33254
CMK-1(K71A/R74Q/R77S)	25	0.369423
CMK-1(K71A/R74Q/R77S)	25	0.371076
CMK-1(K71A/R74Q/R77S)	25	0.383362
CMK-1(K71A/R74Q/R77S)	25	0.385152
CMK-1(K71A/R74Q/R77S)	25	0.38984
CMK-1(K71A/R74Q/R77S)	25	0.428264
CMK-1(K71A/R74Q/R77S)	25	0.440466
CMK-1(K71A/R74Q/R77S)	25	0.445707
CMK-1(K71A/R74Q/R77S)	25	0.454615
CMK-1(K71A/R74Q/R77S)	25	0.456054
CMK-1(K71A/R74Q/R77S)	25	0.460829
CMK-1(K71A/R74Q/R77S)	25	0.469233
CMK-1(K71A/R74Q/R77S)	25	0.473
CMK-1(K71A/R74Q/R77S)	25	0.47738
CMK-1(K71A/R74Q/R77S)	25	0.481722
CMK-1(K71A/R74Q/R77S)	25	0.494303
CMK-1(K71A/R74Q/R77S)	25	0.496145
CMK-1(K71A/R74Q/R77S)	25	0.50462
CMK-1(K71A/R74Q/R77S)	25	0.505387
CMK-1(K71A/R74Q/R77S)	25	0.50765
CMK-1(K71A/R74Q/R77S)	25	0.511557
CMK-1(K71A/R74Q/R77S)	25	0.525591
CMK-1(K71A/R74Q/R77S)	25	0.528634
CMK-1(K71A/R74Q/R77S)	25	0.532805
CMK-1(K71A/R74Q/R77S)	25	0.537755
CMK-1(K71A/R74Q/R77S)	25	0.538459
CMK-1(K71A/R74Q/R77S)	25	0.538949
CMK-1(K71A/R74Q/R77S)	25	0.539667
CMK-1(K71A/R74Q/R77S)	25	0.545088
CMK-1(K71A/R74Q/R77S)	25	0.55552
CMK-1(K71A/R74Q/R77S)	25	0.557118
CMK-1(K71A/R74Q/R77S)	25	0.563069
CMK-1(K71A/R74Q/R77S)	25	0.569087
CMK-1(K71A/R74Q/R77S)	25	0.572148
CMK-1(K71A/R74Q/R77S)	25	0.593957
CMK-1(K71A/R74Q/R77S)	25	0.6
CMK-1(K71A/R74Q/R77S)	25	0.609341
CMK-1(K71A/R74Q/R77S)	25	0.611713
CMK-1(K71A/R74Q/R77S)	25	0.61343
CMK-1(K71A/R74Q/R77S)	25	0.614843
CMK-1(K71A/R74Q/R77S)	25	0.62381
CMK-1(K71A/R74Q/R77S)	25	0.629631
CMK-1(K71A/R74Q/R77S)	25	0.633599
CMK-1(K71A/R74Q/R77S)	25	0.63925
CMK-1(K71A/R74Q/R77S)	25	0.645857
CMK-1(K71A/R74Q/R77S)	25	0.647062
CMK-1(K71A/R74Q/R77S)	25	0.649026
CMK-1(K71A/R74Q/R77S)	25	0.650637
CMK-1(K71A/R74Q/R77S)	25	0.658042
CMK-1(K71A/R74Q/R77S)	25	0.664634
CMK-1(K71A/R74Q/R77S)	25	0.668003
CMK-1(K71A/R74Q/R77S)	25	0.672419
CMK-1(K71A/R74Q/R77S)	25	0.674081
CMK-1(K71A/R74Q/R77S)	25	0.67488
CMK-1(K71A/R74Q/R77S)	25	0.675153
CMK-1(K71A/R74Q/R77S)	25	0.677314
CMK-1(K71A/R74Q/R77S)	25	0.681721
CMK-1(K71A/R74Q/R77S)	25	0.685898
CMK-1(K71A/R74Q/R77S)	25	0.686273
CMK-1(K71A/R74Q/R77S)	25	0.688911
CMK-1(K71A/R74Q/R77S)	25	0.691492
CMK-1(K71A/R74Q/R77S)	25	0.692642
CMK-1(K71A/R74Q/R77S)	25	0.694902
CMK-1(K71A/R74Q/R77S)	25	0.696823
CMK-1(K71A/R74Q/R77S)	25	0.697006
CMK-1(K71A/R74Q/R77S)	25	0.703213
CMK-1(K71A/R74Q/R77S)	25	0.703409
CMK-1(K71A/R74Q/R77S)	25	0.705651
CMK-1(K71A/R74Q/R77S)	25	0.708055
CMK-1(K71A/R74Q/R77S)	25	0.713588
CMK-1(K71A/R74Q/R77S)	25	0.716549
CMK-1(K71A/R74Q/R77S)	25	0.718795
CMK-1(K71A/R74Q/R77S)	25	0.718831
CMK-1(K71A/R74Q/R77S)	25	0.719634
CMK-1(K71A/R74Q/R77S)	25	0.719828
CMK-1(K71A/R74Q/R77S)	25	0.722409
CMK-1(K71A/R74Q/R77S)	25	0.727589
CMK-1(K71A/R74Q/R77S)	25	0.728613
CMK-1(K71A/R74Q/R77S)	25	0.729018
CMK-1(K71A/R74Q/R77S)	25	0.736875
CMK-1(K71A/R74Q/R77S)	25	0.745867
CMK-1(K71A/R74Q/R77S)	25	0.749274
CMK-1(K71A/R74Q/R77S)	25	0.7596
CMK-1(K71A/R74Q/R77S)	25	0.775542
CMK-1(K71A/R74Q/R77S)	25	0.783189
CMK-1(K71A/R74Q/R77S)	25	0.783945
CMK-1(K71A/R74Q/R77S)	25	0.789913
CMK-1(K71A/R74Q/R77S)	25	0.795795
CMK-1(K71A/R74Q/R77S)	25	0.796033
CMK-1(K71A/R74Q/R77S)	25	0.80316
CMK-1(K71A/R74Q/R77S)	25	0.805417
CMK-1(K71A/R74Q/R77S)	25	0.806192
CMK-1(K71A/R74Q/R77S)	25	0.806493
CMK-1(K71A/R74Q/R77S)	25	0.811969
CMK-1(K71A/R74Q/R77S)	25	0.814089
CMK-1(K71A/R74Q/R77S)	25	0.82865
CMK-1(K71A/R74Q/R77S)	25	0.833772
CMK-1(K71A/R74Q/R77S)	25	0.835931
CMK-1(K71A/R74Q/R77S)	25	0.83709
CMK-1(K71A/R74Q/R77S)	25	0.850053
CMK-1(K71A/R74Q/R77S)	25	0.85373
CMK-1(K71A/R74Q/R77S)	25	0.864756
CMK-1(K71A/R74Q/R77S)	25	0.883015
CMK-1(K71A/R74Q/R77S)	25	0.903512
CMK-1(K71A/R74Q/R77S)	25	0.928582
CMK-1(K71A/R74Q/R77S)	25	0.952155
CMK-1(K71A/R74Q/R77S)	25	0.955715
CMK-1(K71A/R74Q/R77S)	25	0.97068
CMK-1(K71A/R74Q/R77S)	25	0.975973
CMK-1(K71A/R74Q/R77S)	25	0.977788
CMK-1(K71A/R74Q/R77S)	25	1.00629
CMK-1(K71A/R74Q/R77S)	25	1.01947
CMK-1(K71A/R74Q/R77S)	25	1.02156
CMK-1(K71A/R74Q/R77S)	25	1.07535
CMK-1(K71A/R74Q/R77S)	25	1.16716
CMK-1(K71A/R74Q/R77S)	25	1.34657
CMK-1(K71A/R74Q/R77S)	25	1.37815
CMK-1(K71A/R74Q/R77S)	15	0.44544
CMK-1(K71A/R74Q/R77S)	15	0.604385
CMK-1(K71A/R74Q/R77S)	15	0.605647
CMK-1(K71A/R74Q/R77S)	15	0.631195
CMK-1(K71A/R74Q/R77S)	15	0.690692
CMK-1(K71A/R74Q/R77S)	15	0.718032
CMK-1(K71A/R74Q/R77S)	15	0.73504
CMK-1(K71A/R74Q/R77S)	15	0.739579
CMK-1(K71A/R74Q/R77S)	15	0.760658
CMK-1(K71A/R74Q/R77S)	15	0.767529
CMK-1(K71A/R74Q/R77S)	15	0.784613
CMK-1(K71A/R74Q/R77S)	15	0.816124
CMK-1(K71A/R74Q/R77S)	15	0.834551
CMK-1(K71A/R74Q/R77S)	15	0.835749
CMK-1(K71A/R74Q/R77S)	15	0.859365
CMK-1(K71A/R74Q/R77S)	15	0.884966
CMK-1(K71A/R74Q/R77S)	15	0.920401
CMK-1(K71A/R74Q/R77S)	15	0.922158
CMK-1(K71A/R74Q/R77S)	15	0.924896
CMK-1(K71A/R74Q/R77S)	15	0.93526
CMK-1(K71A/R74Q/R77S)	15	0.940913
CMK-1(K71A/R74Q/R77S)	15	0.946801
CMK-1(K71A/R74Q/R77S)	15	0.958436
CMK-1(K71A/R74Q/R77S)	15	0.963689
CMK-1(K71A/R74Q/R77S)	15	0.965933
CMK-1(K71A/R74Q/R77S)	15	0.982766
CMK-1(K71A/R74Q/R77S)	15	0.984335
CMK-1(K71A/R74Q/R77S)	15	1.0143
CMK-1(K71A/R74Q/R77S)	15	1.03267
CMK-1(K71A/R74Q/R77S)	15	1.04808
CMK-1(K71A/R74Q/R77S)	15	1.06147
CMK-1(K71A/R74Q/R77S)	15	1.06289
CMK-1(K71A/R74Q/R77S)	15	1.06509
CMK-1(K71A/R74Q/R77S)	15	1.07693
CMK-1(K71A/R74Q/R77S)	15	1.10543
CMK-1(K71A/R74Q/R77S)	15	1.10752
CMK-1(K71A/R74Q/R77S)	15	1.14
CMK-1(K71A/R74Q/R77S)	15	1.14435
CMK-1(K71A/R74Q/R77S)	15	1.15536
CMK-1(K71A/R74Q/R77S)	15	1.16181
CMK-1(K71A/R74Q/R77S)	15	1.16888
CMK-1(K71A/R74Q/R77S)	15	1.17471
CMK-1(K71A/R74Q/R77S)	15	1.18784
CMK-1(K71A/R74Q/R77S)	15	1.20115
CMK-1(K71A/R74Q/R77S)	15	1.22832
CMK-1(K71A/R74Q/R77S)	15	1.23081
CMK-1(K71A/R74Q/R77S)	15	1.24232
CMK-1(K71A/R74Q/R77S)	15	1.28906
CMK-1(K71A/R74Q/R77S)	15	1.29383
CMK-1(K71A/R74Q/R77S)	15	1.3024
CMK-1(K71A/R74Q/R77S)	15	1.30246
CMK-1(K71A/R74Q/R77S)	15	1.32403
CMK-1(K71A/R74Q/R77S)	15	1.32478
CMK-1(K71A/R74Q/R77S)	15	1.33552
CMK-1(K71A/R74Q/R77S)	15	1.34475
CMK-1(K71A/R74Q/R77S)	15	1.35513
CMK-1(K71A/R74Q/R77S)	15	1.36881
CMK-1(K71A/R74Q/R77S)	15	1.37214
CMK-1(K71A/R74Q/R77S)	15	1.37502
CMK-1(K71A/R74Q/R77S)	15	1.40007
CMK-1(K71A/R74Q/R77S)	15	1.40779
CMK-1(K71A/R74Q/R77S)	15	1.41083
CMK-1(K71A/R74Q/R77S)	15	1.41436
CMK-1(K71A/R74Q/R77S)	15	1.42102
CMK-1(K71A/R74Q/R77S)	15	1.43134
CMK-1(K71A/R74Q/R77S)	15	1.45061
CMK-1(K71A/R74Q/R77S)	15	1.45405
CMK-1(K71A/R74Q/R77S)	15	1.45914
CMK-1(K71A/R74Q/R77S)	15	1.47619
CMK-1(K71A/R74Q/R77S)	15	1.49168
CMK-1(K71A/R74Q/R77S)	15	1.49511
CMK-1(K71A/R74Q/R77S)	15	1.50115
CMK-1(K71A/R74Q/R77S)	15	1.51056
CMK-1(K71A/R74Q/R77S)	15	1.53474
CMK-1(K71A/R74Q/R77S)	15	1.5421
CMK-1(K71A/R74Q/R77S)	15	1.55625
CMK-1(K71A/R74Q/R77S)	15	1.58926
CMK-1(K71A/R74Q/R77S)	15	1.60117
CMK-1(K71A/R74Q/R77S)	15	1.60209
CMK-1(K71A/R74Q/R77S)	15	1.60284
CMK-1(K71A/R74Q/R77S)	15	1.60621
CMK-1(K71A/R74Q/R77S)	15	1.61275
CMK-1(K71A/R74Q/R77S)	15	1.61494
CMK-1(K71A/R74Q/R77S)	15	1.65673
CMK-1(K71A/R74Q/R77S)	15	1.6667
CMK-1(K71A/R74Q/R77S)	15	1.70219
CMK-1(K71A/R74Q/R77S)	15	1.71363
CMK-1(K71A/R74Q/R77S)	15	1.75514
CMK-1(K71A/R74Q/R77S)	15	1.77071
CMK-1(K71A/R74Q/R77S)	15	1.77745
CMK-1(K71A/R74Q/R77S)	15	1.82686
CMK-1(K71A/R74Q/R77S)	15	1.89472
CMK-1(K71A/R74Q/R77S)	15	1.94092
CMK-1(K71A/R74Q/R77S)	15	2.01937
CMK-1(K71A/R74Q/R77S)	15	2.12122
CMK-1(K71A/R74Q/R77S)	15	2.20424
CMK-1(K71A/R74Q/R77S)	15	2.27257
CMK-1(K71A/R74Q/R77S)	15	2.27534
CMK-1(K71A/R74Q/R77S)	15	2.67212
CMK-1(K71A/R74Q/R77S)	25	0.429014
CMK-1(K71A/R74Q/R77S)	25	0.44468
CMK-1(K71A/R74Q/R77S)	25	0.454533
CMK-1(K71A/R74Q/R77S)	25	0.466123
CMK-1(K71A/R74Q/R77S)	25	0.47178
CMK-1(K71A/R74Q/R77S)	25	0.478926
CMK-1(K71A/R74Q/R77S)	25	0.481412
CMK-1(K71A/R74Q/R77S)	25	0.483427
CMK-1(K71A/R74Q/R77S)	25	0.488134
CMK-1(K71A/R74Q/R77S)	25	0.493321
CMK-1(K71A/R74Q/R77S)	25	0.502145
CMK-1(K71A/R74Q/R77S)	25	0.506142
CMK-1(K71A/R74Q/R77S)	25	0.515373
CMK-1(K71A/R74Q/R77S)	25	0.529171
CMK-1(K71A/R74Q/R77S)	25	0.529587
CMK-1(K71A/R74Q/R77S)	25	0.531261
CMK-1(K71A/R74Q/R77S)	25	0.540469
CMK-1(K71A/R74Q/R77S)	25	0.553409
CMK-1(K71A/R74Q/R77S)	25	0.553751
CMK-1(K71A/R74Q/R77S)	25	0.554262
CMK-1(K71A/R74Q/R77S)	25	0.555548
CMK-1(K71A/R74Q/R77S)	25	0.556971
CMK-1(K71A/R74Q/R77S)	25	0.563004
CMK-1(K71A/R74Q/R77S)	25	0.574397
CMK-1(K71A/R74Q/R77S)	25	0.574527
CMK-1(K71A/R74Q/R77S)	25	0.574902
CMK-1(K71A/R74Q/R77S)	25	0.576829
CMK-1(K71A/R74Q/R77S)	25	0.577935
CMK-1(K71A/R74Q/R77S)	25	0.583339
CMK-1(K71A/R74Q/R77S)	25	0.58805
CMK-1(K71A/R74Q/R77S)	25	0.591203
CMK-1(K71A/R74Q/R77S)	25	0.595048
CMK-1(K71A/R74Q/R77S)	25	0.595617
CMK-1(K71A/R74Q/R77S)	25	0.598919
CMK-1(K71A/R74Q/R77S)	25	0.601909
CMK-1(K71A/R74Q/R77S)	25	0.608519
CMK-1(K71A/R74Q/R77S)	25	0.61344
CMK-1(K71A/R74Q/R77S)	25	0.614973
CMK-1(K71A/R74Q/R77S)	25	0.615533
CMK-1(K71A/R74Q/R77S)	25	0.616135
CMK-1(K71A/R74Q/R77S)	25	0.617761
CMK-1(K71A/R74Q/R77S)	25	0.619077
CMK-1(K71A/R74Q/R77S)	25	0.620674
CMK-1(K71A/R74Q/R77S)	25	0.623987
CMK-1(K71A/R74Q/R77S)	25	0.630997
CMK-1(K71A/R74Q/R77S)	25	0.635308
CMK-1(K71A/R74Q/R77S)	25	0.646828
CMK-1(K71A/R74Q/R77S)	25	0.648017
CMK-1(K71A/R74Q/R77S)	25	0.648548
CMK-1(K71A/R74Q/R77S)	25	0.649289
CMK-1(K71A/R74Q/R77S)	25	0.649353
CMK-1(K71A/R74Q/R77S)	25	0.655792
CMK-1(K71A/R74Q/R77S)	25	0.656325
CMK-1(K71A/R74Q/R77S)	25	0.656853
CMK-1(K71A/R74Q/R77S)	25	0.663628
CMK-1(K71A/R74Q/R77S)	25	0.665163
CMK-1(K71A/R74Q/R77S)	25	0.667708
CMK-1(K71A/R74Q/R77S)	25	0.67365
CMK-1(K71A/R74Q/R77S)	25	0.67941
CMK-1(K71A/R74Q/R77S)	25	0.682008
CMK-1(K71A/R74Q/R77S)	25	0.690285
CMK-1(K71A/R74Q/R77S)	25	0.690388
CMK-1(K71A/R74Q/R77S)	25	0.693445
CMK-1(K71A/R74Q/R77S)	25	0.698114
CMK-1(K71A/R74Q/R77S)	25	0.699819
CMK-1(K71A/R74Q/R77S)	25	0.704813
CMK-1(K71A/R74Q/R77S)	25	0.713861
CMK-1(K71A/R74Q/R77S)	25	0.716395
CMK-1(K71A/R74Q/R77S)	25	0.720175
CMK-1(K71A/R74Q/R77S)	25	0.722224
CMK-1(K71A/R74Q/R77S)	25	0.725915
CMK-1(K71A/R74Q/R77S)	25	0.726984
CMK-1(K71A/R74Q/R77S)	25	0.728439
CMK-1(K71A/R74Q/R77S)	25	0.732158
CMK-1(K71A/R74Q/R77S)	25	0.73548
CMK-1(K71A/R74Q/R77S)	25	0.735961
CMK-1(K71A/R74Q/R77S)	25	0.738212
CMK-1(K71A/R74Q/R77S)	25	0.738808
CMK-1(K71A/R74Q/R77S)	25	0.739275
CMK-1(K71A/R74Q/R77S)	25	0.742395
CMK-1(K71A/R74Q/R77S)	25	0.746652
CMK-1(K71A/R74Q/R77S)	25	0.747156
CMK-1(K71A/R74Q/R77S)	25	0.747809
CMK-1(K71A/R74Q/R77S)	25	0.756717
CMK-1(K71A/R74Q/R77S)	25	0.759789
CMK-1(K71A/R74Q/R77S)	25	0.760185
CMK-1(K71A/R74Q/R77S)	25	0.760606
CMK-1(K71A/R74Q/R77S)	25	0.762811
CMK-1(K71A/R74Q/R77S)	25	0.76365
CMK-1(K71A/R74Q/R77S)	25	0.765874
CMK-1(K71A/R74Q/R77S)	25	0.766754
CMK-1(K71A/R74Q/R77S)	25	0.770653
CMK-1(K71A/R74Q/R77S)	25	0.77251
CMK-1(K71A/R74Q/R77S)	25	0.77441
CMK-1(K71A/R74Q/R77S)	25	0.781376
CMK-1(K71A/R74Q/R77S)	25	0.78964
CMK-1(K71A/R74Q/R77S)	25	0.789861
CMK-1(K71A/R74Q/R77S)	25	0.803039
CMK-1(K71A/R74Q/R77S)	25	0.811001
CMK-1(K71A/R74Q/R77S)	25	0.820302
CMK-1(K71A/R74Q/R77S)	25	0.820703
CMK-1(K71A/R74Q/R77S)	25	0.821902
CMK-1(K71A/R74Q/R77S)	25	0.822577
CMK-1(K71A/R74Q/R77S)	25	0.830941
CMK-1(K71A/R74Q/R77S)	25	0.835477
CMK-1(K71A/R74Q/R77S)	25	0.836276
CMK-1(K71A/R74Q/R77S)	25	0.851184
CMK-1(K71A/R74Q/R77S)	25	0.854276
CMK-1(K71A/R74Q/R77S)	25	0.857862
CMK-1(K71A/R74Q/R77S)	25	0.858786
CMK-1(K71A/R74Q/R77S)	25	0.862965
CMK-1(K71A/R74Q/R77S)	25	0.879497
CMK-1(K71A/R74Q/R77S)	25	0.886343
CMK-1(K71A/R74Q/R77S)	25	0.889895
CMK-1(K71A/R74Q/R77S)	25	0.894767
CMK-1(K71A/R74Q/R77S)	25	0.895693
CMK-1(K71A/R74Q/R77S)	25	0.914192
CMK-1(K71A/R74Q/R77S)	25	0.916002
CMK-1(K71A/R74Q/R77S)	25	0.91956
CMK-1(K71A/R74Q/R77S)	25	0.928707
CMK-1(K71A/R74Q/R77S)	25	0.938676
CMK-1(K71A/R74Q/R77S)	25	0.953616
CMK-1(K71A/R74Q/R77S)	25	0.953801
CMK-1(K71A/R74Q/R77S)	25	0.954126
CMK-1(K71A/R74Q/R77S)	25	0.962743
CMK-1(K71A/R74Q/R77S)	25	0.973658
CMK-1(K71A/R74Q/R77S)	25	0.974441
CMK-1(K71A/R74Q/R77S)	25	0.977521
CMK-1(K71A/R74Q/R77S)	25	0.988794
CMK-1(K71A/R74Q/R77S)	25	0.989804
CMK-1(K71A/R74Q/R77S)	25	1
CMK-1(K71A/R74Q/R77S)	25	1.0112
CMK-1(K71A/R74Q/R77S)	25	1.01398
CMK-1(K71A/R74Q/R77S)	25	1.02093
CMK-1(K71A/R74Q/R77S)	25	1.04546
CMK-1(K71A/R74Q/R77S)	25	1.08528
CMK-1(K71A/R74Q/R77S)	25	1.08571
CMK-1(K71A/R74Q/R77S)	25	1.08845
CMK-1(K71A/R74Q/R77S)	25	1.15643
CMK-1(K71A/R74Q/R77S)	25	1.21682
CMK-1(K71A/R74Q/R77S)	25	1.31774
CMK-1(K71A/R74Q/R77S)	25	1.32976
CMK-1(K71A/R74Q/R77S)	25	1.35156
CMK-1(K71A/R74Q/R77S)	15	0.366902
CMK-1(K71A/R74Q/R77S)	15	0.410377
CMK-1(K71A/R74Q/R77S)	15	0.425683
CMK-1(K71A/R74Q/R77S)	15	0.455711
CMK-1(K71A/R74Q/R77S)	15	0.46443
CMK-1(K71A/R74Q/R77S)	15	0.510868
CMK-1(K71A/R74Q/R77S)	15	0.674875
CMK-1(K71A/R74Q/R77S)	15	0.685554
CMK-1(K71A/R74Q/R77S)	15	0.694375
CMK-1(K71A/R74Q/R77S)	15	0.754008
CMK-1(K71A/R74Q/R77S)	15	0.776057
CMK-1(K71A/R74Q/R77S)	15	0.80656
CMK-1(K71A/R74Q/R77S)	15	0.828559
CMK-1(K71A/R74Q/R77S)	15	0.836616
CMK-1(K71A/R74Q/R77S)	15	0.853804
CMK-1(K71A/R74Q/R77S)	15	0.857113
CMK-1(K71A/R74Q/R77S)	15	0.868012
CMK-1(K71A/R74Q/R77S)	15	0.870599
CMK-1(K71A/R74Q/R77S)	15	0.871943
CMK-1(K71A/R74Q/R77S)	15	0.877757
CMK-1(K71A/R74Q/R77S)	15	0.893338
CMK-1(K71A/R74Q/R77S)	15	0.909851
CMK-1(K71A/R74Q/R77S)	15	0.953751
CMK-1(K71A/R74Q/R77S)	15	0.984604
CMK-1(K71A/R74Q/R77S)	15	0.987413
CMK-1(K71A/R74Q/R77S)	15	0.995952
CMK-1(K71A/R74Q/R77S)	15	1.03383
CMK-1(K71A/R74Q/R77S)	15	1.04774
CMK-1(K71A/R74Q/R77S)	15	1.06004
CMK-1(K71A/R74Q/R77S)	15	1.07963
CMK-1(K71A/R74Q/R77S)	15	1.17825
CMK-1(K71A/R74Q/R77S)	15	1.20367
CMK-1(K71A/R74Q/R77S)	15	1.21359
CMK-1(K71A/R74Q/R77S)	15	1.21863
CMK-1(K71A/R74Q/R77S)	15	1.23824
CMK-1(K71A/R74Q/R77S)	15	1.2388
CMK-1(K71A/R74Q/R77S)	15	1.24766
CMK-1(K71A/R74Q/R77S)	15	1.26183
CMK-1(K71A/R74Q/R77S)	15	1.28114
CMK-1(K71A/R74Q/R77S)	15	1.3413
CMK-1(K71A/R74Q/R77S)	15	1.36312
CMK-1(K71A/R74Q/R77S)	15	1.36457
CMK-1(K71A/R74Q/R77S)	15	1.41277
CMK-1(K71A/R74Q/R77S)	15	1.42422
CMK-1(K71A/R74Q/R77S)	15	1.43948
CMK-1(K71A/R74Q/R77S)	15	1.44901
CMK-1(K71A/R74Q/R77S)	15	1.46171
CMK-1(K71A/R74Q/R77S)	15	1.46294
CMK-1(K71A/R74Q/R77S)	15	1.475
CMK-1(K71A/R74Q/R77S)	15	1.47664
CMK-1(K71A/R74Q/R77S)	15	1.48051
CMK-1(K71A/R74Q/R77S)	15	1.53633
CMK-1(K71A/R74Q/R77S)	15	1.53957
CMK-1(K71A/R74Q/R77S)	15	1.5491
CMK-1(K71A/R74Q/R77S)	15	1.59597
CMK-1(K71A/R74Q/R77S)	15	1.59764
CMK-1(K71A/R74Q/R77S)	15	1.60543
CMK-1(K71A/R74Q/R77S)	15	1.61011
CMK-1(K71A/R74Q/R77S)	15	1.61759
CMK-1(K71A/R74Q/R77S)	15	1.64182
CMK-1(K71A/R74Q/R77S)	15	1.6825
CMK-1(K71A/R74Q/R77S)	15	1.70198
CMK-1(K71A/R74Q/R77S)	15	1.7233
CMK-1(K71A/R74Q/R77S)	15	1.73878
CMK-1(K71A/R74Q/R77S)	15	1.76385
CMK-1(K71A/R74Q/R77S)	15	1.83721
CMK-1(K71A/R74Q/R77S)	15	1.97862
CMK-1(K71A/R74Q/R77S)	15	1.99433
CMK-1(K71A/R74Q/R77S)	15	2.02346
CMK-1(K71A/R74Q/R77S)	15	2.79226
CMK-1(K71A/R74Q/R77S)	15	2.94144
CMK-1(K71A/R74Q/R77S)	25	0.37357
CMK-1(K71A/R74Q/R77S)	25	0.411976
CMK-1(K71A/R74Q/R77S)	25	0.47678
CMK-1(K71A/R74Q/R77S)	25	0.509424
CMK-1(K71A/R74Q/R77S)	25	0.519832
CMK-1(K71A/R74Q/R77S)	25	0.522143
CMK-1(K71A/R74Q/R77S)	25	0.528079
CMK-1(K71A/R74Q/R77S)	25	0.533462
CMK-1(K71A/R74Q/R77S)	25	0.55951
CMK-1(K71A/R74Q/R77S)	25	0.559659
CMK-1(K71A/R74Q/R77S)	25	0.564031
CMK-1(K71A/R74Q/R77S)	25	0.566455
CMK-1(K71A/R74Q/R77S)	25	0.57929
CMK-1(K71A/R74Q/R77S)	25	0.600579
CMK-1(K71A/R74Q/R77S)	25	0.608656
CMK-1(K71A/R74Q/R77S)	25	0.614019
CMK-1(K71A/R74Q/R77S)	25	0.615122
CMK-1(K71A/R74Q/R77S)	25	0.62394
CMK-1(K71A/R74Q/R77S)	25	0.633711
CMK-1(K71A/R74Q/R77S)	25	0.637281
CMK-1(K71A/R74Q/R77S)	25	0.640228
CMK-1(K71A/R74Q/R77S)	25	0.64737
CMK-1(K71A/R74Q/R77S)	25	0.649167
CMK-1(K71A/R74Q/R77S)	25	0.652894
CMK-1(K71A/R74Q/R77S)	25	0.654167
CMK-1(K71A/R74Q/R77S)	25	0.656156
CMK-1(K71A/R74Q/R77S)	25	0.658253
CMK-1(K71A/R74Q/R77S)	25	0.659723
CMK-1(K71A/R74Q/R77S)	25	0.659975
CMK-1(K71A/R74Q/R77S)	25	0.662887
CMK-1(K71A/R74Q/R77S)	25	0.66379
CMK-1(K71A/R74Q/R77S)	25	0.668003
CMK-1(K71A/R74Q/R77S)	25	0.66889
CMK-1(K71A/R74Q/R77S)	25	0.671494
CMK-1(K71A/R74Q/R77S)	25	0.675747
CMK-1(K71A/R74Q/R77S)	25	0.67675
CMK-1(K71A/R74Q/R77S)	25	0.678385
CMK-1(K71A/R74Q/R77S)	25	0.681849
CMK-1(K71A/R74Q/R77S)	25	0.682014
CMK-1(K71A/R74Q/R77S)	25	0.682865
CMK-1(K71A/R74Q/R77S)	25	0.68515
CMK-1(K71A/R74Q/R77S)	25	0.690809
CMK-1(K71A/R74Q/R77S)	25	0.693211
CMK-1(K71A/R74Q/R77S)	25	0.697607
CMK-1(K71A/R74Q/R77S)	25	0.701355
CMK-1(K71A/R74Q/R77S)	25	0.701731
CMK-1(K71A/R74Q/R77S)	25	0.70225
CMK-1(K71A/R74Q/R77S)	25	0.702507
CMK-1(K71A/R74Q/R77S)	25	0.706876
CMK-1(K71A/R74Q/R77S)	25	0.711458
CMK-1(K71A/R74Q/R77S)	25	0.712048
CMK-1(K71A/R74Q/R77S)	25	0.712088
CMK-1(K71A/R74Q/R77S)	25	0.71488
CMK-1(K71A/R74Q/R77S)	25	0.71753
CMK-1(K71A/R74Q/R77S)	25	0.724514
CMK-1(K71A/R74Q/R77S)	25	0.724574
CMK-1(K71A/R74Q/R77S)	25	0.724897
CMK-1(K71A/R74Q/R77S)	25	0.727316
CMK-1(K71A/R74Q/R77S)	25	0.728575
CMK-1(K71A/R74Q/R77S)	25	0.731445
CMK-1(K71A/R74Q/R77S)	25	0.736822
CMK-1(K71A/R74Q/R77S)	25	0.756029
CMK-1(K71A/R74Q/R77S)	25	0.757129
CMK-1(K71A/R74Q/R77S)	25	0.75906
CMK-1(K71A/R74Q/R77S)	25	0.761344
CMK-1(K71A/R74Q/R77S)	25	0.763225
CMK-1(K71A/R74Q/R77S)	25	0.767028
CMK-1(K71A/R74Q/R77S)	25	0.768907
CMK-1(K71A/R74Q/R77S)	25	0.772936
CMK-1(K71A/R74Q/R77S)	25	0.773183
CMK-1(K71A/R74Q/R77S)	25	0.778635
CMK-1(K71A/R74Q/R77S)	25	0.782743
CMK-1(K71A/R74Q/R77S)	25	0.783945
CMK-1(K71A/R74Q/R77S)	25	0.784311
CMK-1(K71A/R74Q/R77S)	25	0.787467
CMK-1(K71A/R74Q/R77S)	25	0.78825
CMK-1(K71A/R74Q/R77S)	25	0.791829
CMK-1(K71A/R74Q/R77S)	25	0.796839
CMK-1(K71A/R74Q/R77S)	25	0.799131
CMK-1(K71A/R74Q/R77S)	25	0.799427
CMK-1(K71A/R74Q/R77S)	25	0.801844
CMK-1(K71A/R74Q/R77S)	25	0.802708
CMK-1(K71A/R74Q/R77S)	25	0.805483
CMK-1(K71A/R74Q/R77S)	25	0.807284
CMK-1(K71A/R74Q/R77S)	25	0.809681
CMK-1(K71A/R74Q/R77S)	25	0.812121
CMK-1(K71A/R74Q/R77S)	25	0.812751
CMK-1(K71A/R74Q/R77S)	25	0.813318
CMK-1(K71A/R74Q/R77S)	25	0.81747
CMK-1(K71A/R74Q/R77S)	25	0.821211
CMK-1(K71A/R74Q/R77S)	25	0.82655
CMK-1(K71A/R74Q/R77S)	25	0.829126
CMK-1(K71A/R74Q/R77S)	25	0.832449
CMK-1(K71A/R74Q/R77S)	25	0.833369
CMK-1(K71A/R74Q/R77S)	25	0.833891
CMK-1(K71A/R74Q/R77S)	25	0.834071
CMK-1(K71A/R74Q/R77S)	25	0.837687
CMK-1(K71A/R74Q/R77S)	25	0.839523
CMK-1(K71A/R74Q/R77S)	25	0.842531
CMK-1(K71A/R74Q/R77S)	25	0.844752
CMK-1(K71A/R74Q/R77S)	25	0.845127
CMK-1(K71A/R74Q/R77S)	25	0.845414
CMK-1(K71A/R74Q/R77S)	25	0.847407
CMK-1(K71A/R74Q/R77S)	25	0.849669
CMK-1(K71A/R74Q/R77S)	25	0.850695
CMK-1(K71A/R74Q/R77S)	25	0.854353
CMK-1(K71A/R74Q/R77S)	25	0.859411
CMK-1(K71A/R74Q/R77S)	25	0.863338
CMK-1(K71A/R74Q/R77S)	25	0.864121
CMK-1(K71A/R74Q/R77S)	25	0.866383
CMK-1(K71A/R74Q/R77S)	25	0.871976
CMK-1(K71A/R74Q/R77S)	25	0.877222
CMK-1(K71A/R74Q/R77S)	25	0.877953
CMK-1(K71A/R74Q/R77S)	25	0.880828
CMK-1(K71A/R74Q/R77S)	25	0.884709
CMK-1(K71A/R74Q/R77S)	25	0.885619
CMK-1(K71A/R74Q/R77S)	25	0.887311
CMK-1(K71A/R74Q/R77S)	25	0.888503
CMK-1(K71A/R74Q/R77S)	25	0.897056
CMK-1(K71A/R74Q/R77S)	25	0.898892
CMK-1(K71A/R74Q/R77S)	25	0.901596
CMK-1(K71A/R74Q/R77S)	25	0.912499
CMK-1(K71A/R74Q/R77S)	25	0.913023
CMK-1(K71A/R74Q/R77S)	25	0.917179
CMK-1(K71A/R74Q/R77S)	25	0.932141
CMK-1(K71A/R74Q/R77S)	25	0.935671
CMK-1(K71A/R74Q/R77S)	25	0.945951
CMK-1(K71A/R74Q/R77S)	25	0.957065
CMK-1(K71A/R74Q/R77S)	25	0.958576
CMK-1(K71A/R74Q/R77S)	25	0.9667
CMK-1(K71A/R74Q/R77S)	25	0.970878
CMK-1(K71A/R74Q/R77S)	25	0.973642
CMK-1(K71A/R74Q/R77S)	25	0.975641
CMK-1(K71A/R74Q/R77S)	25	1.032
CMK-1(K71A/R74Q/R77S)	25	1.04992
CMK-1(K71A/R74Q/R77S)	25	1.05266
CMK-1(K71A/R74Q/R77S)	25	1.05317
CMK-1(K71A/R74Q/R77S)	25	1.05764
CMK-1(K71A/R74Q/R77S)	25	1.0684
CMK-1(K71A/R74Q/R77S)	25	1.08212
CMK-1(K71A/R74Q/R77S)	25	1.08386
CMK-1(K71A/R74Q/R77S)	25	1.08761
CMK-1(K71A/R74Q/R77S)	25	1.11945
CMK-1(K71A/R74Q/R77S)	25	1.13322
CMK-1(K71A/R74Q/R77S)	25	1.32843
CMK-1(K71A/R74Q/R77S)	25	1.34432
CMK-1(K71A/R74Q/R77S)	25	1.3861
CMK-1(K71A/R74Q/R77S)	25	1.39389
CMK-1(V292A/V294A)	15	0.523074
CMK-1(V292A/V294A)	15	0.847081
CMK-1(V292A/V294A)	15	1.01491
CMK-1(V292A/V294A)	15	1.01691
CMK-1(V292A/V294A)	15	1.01776
CMK-1(V292A/V294A)	15	1.02637
CMK-1(V292A/V294A)	15	1.0424
CMK-1(V292A/V294A)	15	1.05455
CMK-1(V292A/V294A)	15	1.05558
CMK-1(V292A/V294A)	15	1.05637
CMK-1(V292A/V294A)	15	1.06242
CMK-1(V292A/V294A)	15	1.0643
CMK-1(V292A/V294A)	15	1.07571
CMK-1(V292A/V294A)	15	1.07683
CMK-1(V292A/V294A)	15	1.08566
CMK-1(V292A/V294A)	15	1.09003
CMK-1(V292A/V294A)	15	1.1009
CMK-1(V292A/V294A)	15	1.11032
CMK-1(V292A/V294A)	15	1.12041
CMK-1(V292A/V294A)	15	1.16389
CMK-1(V292A/V294A)	15	1.1784
CMK-1(V292A/V294A)	15	1.19326
CMK-1(V292A/V294A)	15	1.24696
CMK-1(V292A/V294A)	15	1.26731
CMK-1(V292A/V294A)	15	1.29349
CMK-1(V292A/V294A)	15	1.29546
CMK-1(V292A/V294A)	15	1.31104
CMK-1(V292A/V294A)	15	1.32294
CMK-1(V292A/V294A)	15	1.34468
CMK-1(V292A/V294A)	15	1.34478
CMK-1(V292A/V294A)	15	1.35434
CMK-1(V292A/V294A)	15	1.35686
CMK-1(V292A/V294A)	15	1.35858
CMK-1(V292A/V294A)	15	1.37215
CMK-1(V292A/V294A)	15	1.37663
CMK-1(V292A/V294A)	15	1.38412
CMK-1(V292A/V294A)	15	1.3985
CMK-1(V292A/V294A)	15	1.40886
CMK-1(V292A/V294A)	15	1.4367
CMK-1(V292A/V294A)	15	1.45104
CMK-1(V292A/V294A)	15	1.45704
CMK-1(V292A/V294A)	15	1.45871
CMK-1(V292A/V294A)	15	1.46334
CMK-1(V292A/V294A)	15	1.47159
CMK-1(V292A/V294A)	15	1.49907
CMK-1(V292A/V294A)	15	1.50219
CMK-1(V292A/V294A)	15	1.53205
CMK-1(V292A/V294A)	15	1.54832
CMK-1(V292A/V294A)	15	1.56173
CMK-1(V292A/V294A)	15	1.56485
CMK-1(V292A/V294A)	15	1.57286
CMK-1(V292A/V294A)	15	1.58935
CMK-1(V292A/V294A)	15	1.59895
CMK-1(V292A/V294A)	15	1.64648
CMK-1(V292A/V294A)	15	1.65429
CMK-1(V292A/V294A)	15	1.66758
CMK-1(V292A/V294A)	15	1.67668
CMK-1(V292A/V294A)	15	1.6952
CMK-1(V292A/V294A)	15	1.70996
CMK-1(V292A/V294A)	15	1.72823
CMK-1(V292A/V294A)	15	1.72898
CMK-1(V292A/V294A)	15	1.73764
CMK-1(V292A/V294A)	15	1.77861
CMK-1(V292A/V294A)	15	1.78116
CMK-1(V292A/V294A)	15	1.83434
CMK-1(V292A/V294A)	15	1.85627
CMK-1(V292A/V294A)	15	1.88768
CMK-1(V292A/V294A)	15	1.89957
CMK-1(V292A/V294A)	15	1.90136
CMK-1(V292A/V294A)	15	1.94305
CMK-1(V292A/V294A)	15	1.95389
CMK-1(V292A/V294A)	15	1.99263
CMK-1(V292A/V294A)	15	2.04913
CMK-1(V292A/V294A)	15	2.09966
CMK-1(V292A/V294A)	15	2.11132
CMK-1(V292A/V294A)	15	2.41733
CMK-1(V292A/V294A)	15	2.50439
CMK-1(V292A/V294A)	25	0.445378
CMK-1(V292A/V294A)	25	0.610263
CMK-1(V292A/V294A)	25	0.697431
CMK-1(V292A/V294A)	25	0.873586
CMK-1(V292A/V294A)	25	0.907174
CMK-1(V292A/V294A)	25	0.908801
CMK-1(V292A/V294A)	25	0.913581
CMK-1(V292A/V294A)	25	0.934449
CMK-1(V292A/V294A)	25	0.95538
CMK-1(V292A/V294A)	25	0.957089
CMK-1(V292A/V294A)	25	0.960261
CMK-1(V292A/V294A)	25	0.970627
CMK-1(V292A/V294A)	25	0.976187
CMK-1(V292A/V294A)	25	0.981611
CMK-1(V292A/V294A)	25	0.985161
CMK-1(V292A/V294A)	25	0.98617
CMK-1(V292A/V294A)	25	0.987657
CMK-1(V292A/V294A)	25	0.987975
CMK-1(V292A/V294A)	25	0.988558
CMK-1(V292A/V294A)	25	0.989736
CMK-1(V292A/V294A)	25	0.995141
CMK-1(V292A/V294A)	25	1
CMK-1(V292A/V294A)	25	1.00151
CMK-1(V292A/V294A)	25	1.00159
CMK-1(V292A/V294A)	25	1.00441
CMK-1(V292A/V294A)	25	1.00752
CMK-1(V292A/V294A)	25	1.00986
CMK-1(V292A/V294A)	25	1.00997
CMK-1(V292A/V294A)	25	1.01099
CMK-1(V292A/V294A)	25	1.01367
CMK-1(V292A/V294A)	25	1.01723
CMK-1(V292A/V294A)	25	1.01845
CMK-1(V292A/V294A)	25	1.0192
CMK-1(V292A/V294A)	25	1.02044
CMK-1(V292A/V294A)	25	1.02165
CMK-1(V292A/V294A)	25	1.02281
CMK-1(V292A/V294A)	25	1.02374
CMK-1(V292A/V294A)	25	1.02643
CMK-1(V292A/V294A)	25	1.0266
CMK-1(V292A/V294A)	25	1.02875
CMK-1(V292A/V294A)	25	1.02989
CMK-1(V292A/V294A)	25	1.02999
CMK-1(V292A/V294A)	25	1.03083
CMK-1(V292A/V294A)	25	1.03197
CMK-1(V292A/V294A)	25	1.03305
CMK-1(V292A/V294A)	25	1.03797
CMK-1(V292A/V294A)	25	1.04019
CMK-1(V292A/V294A)	25	1.04347
CMK-1(V292A/V294A)	25	1.04458
CMK-1(V292A/V294A)	25	1.04479
CMK-1(V292A/V294A)	25	1.04518
CMK-1(V292A/V294A)	25	1.04829
CMK-1(V292A/V294A)	25	1.05126
CMK-1(V292A/V294A)	25	1.05179
CMK-1(V292A/V294A)	25	1.05251
CMK-1(V292A/V294A)	25	1.05297
CMK-1(V292A/V294A)	25	1.05328
CMK-1(V292A/V294A)	25	1.05432
CMK-1(V292A/V294A)	25	1.05819
CMK-1(V292A/V294A)	25	1.06078
CMK-1(V292A/V294A)	25	1.06116
CMK-1(V292A/V294A)	25	1.06162
CMK-1(V292A/V294A)	25	1.06356
CMK-1(V292A/V294A)	25	1.06443
CMK-1(V292A/V294A)	25	1.06943
CMK-1(V292A/V294A)	25	1.06944
CMK-1(V292A/V294A)	25	1.0766
CMK-1(V292A/V294A)	25	1.07755
CMK-1(V292A/V294A)	25	1.07971
CMK-1(V292A/V294A)	25	1.08129
CMK-1(V292A/V294A)	25	1.08216
CMK-1(V292A/V294A)	25	1.08548
CMK-1(V292A/V294A)	25	1.08577
CMK-1(V292A/V294A)	25	1.08621
CMK-1(V292A/V294A)	25	1.08902
CMK-1(V292A/V294A)	25	1.09139
CMK-1(V292A/V294A)	25	1.09156
CMK-1(V292A/V294A)	25	1.09917
CMK-1(V292A/V294A)	25	1.10044
CMK-1(V292A/V294A)	25	1.10451
CMK-1(V292A/V294A)	25	1.10733
CMK-1(V292A/V294A)	25	1.11272
CMK-1(V292A/V294A)	25	1.12386
CMK-1(V292A/V294A)	25	1.12631
CMK-1(V292A/V294A)	25	1.15132
CMK-1(V292A/V294A)	25	1.15241
CMK-1(V292A/V294A)	25	1.15813
CMK-1(V292A/V294A)	25	1.15854
CMK-1(V292A/V294A)	25	1.18746
CMK-1(V292A/V294A)	25	1.18789
CMK-1(V292A/V294A)	25	1.19018
CMK-1(V292A/V294A)	25	1.19179
CMK-1(V292A/V294A)	25	1.20079
CMK-1(V292A/V294A)	25	1.20565
CMK-1(V292A/V294A)	25	1.21483
CMK-1(V292A/V294A)	25	1.21605
CMK-1(V292A/V294A)	25	1.22135
CMK-1(V292A/V294A)	25	1.22958
CMK-1(V292A/V294A)	25	1.23324
CMK-1(V292A/V294A)	25	1.24149
CMK-1(V292A/V294A)	25	1.24351
CMK-1(V292A/V294A)	25	1.24518
CMK-1(V292A/V294A)	25	1.24635
CMK-1(V292A/V294A)	25	1.2566
CMK-1(V292A/V294A)	25	1.25911
CMK-1(V292A/V294A)	25	1.28182
CMK-1(V292A/V294A)	25	1.28538
CMK-1(V292A/V294A)	25	1.3136
CMK-1(V292A/V294A)	25	1.34614
CMK-1(V292A/V294A)	25	1.3469
CMK-1(V292A/V294A)	25	1.35588
CMK-1(V292A/V294A)	25	1.36497
CMK-1(V292A/V294A)	25	1.41461
CMK-1(V292A/V294A)	25	1.41643
CMK-1(V292A/V294A)	25	1.42041
CMK-1(V292A/V294A)	25	1.42917
CMK-1(V292A/V294A)	25	1.43454
CMK-1(V292A/V294A)	25	1.44978
CMK-1(V292A/V294A)	25	1.45232
CMK-1(V292A/V294A)	25	1.45298
CMK-1(V292A/V294A)	25	1.45627
CMK-1(V292A/V294A)	25	1.45697
CMK-1(V292A/V294A)	25	1.46549
CMK-1(V292A/V294A)	25	1.4694
CMK-1(V292A/V294A)	25	1.47014
CMK-1(V292A/V294A)	25	1.48679
CMK-1(V292A/V294A)	25	1.50369
CMK-1(V292A/V294A)	25	1.51742
CMK-1(V292A/V294A)	25	1.56432
CMK-1(V292A/V294A)	25	1.5652
CMK-1(V292A/V294A)	25	1.57046
CMK-1(V292A/V294A)	25	1.57115
CMK-1(V292A/V294A)	25	1.57734
CMK-1(V292A/V294A)	25	1.57761
CMK-1(V292A/V294A)	25	1.58234
CMK-1(V292A/V294A)	25	1.62208
CMK-1(V292A/V294A)	25	1.62211
CMK-1(V292A/V294A)	25	1.64121
CMK-1(V292A/V294A)	25	1.66987
CMK-1(V292A/V294A)	25	1.67468
CMK-1(V292A/V294A)	25	1.68866
CMK-1(V292A/V294A)	25	1.71294
CMK-1(V292A/V294A)	25	1.74359
CMK-1(V292A/V294A)	25	1.74748
CMK-1(V292A/V294A)	25	1.76367
CMK-1(V292A/V294A)	25	1.76441
CMK-1(V292A/V294A)	25	1.82007
CMK-1(V292A/V294A)	25	1.84172
CMK-1(V292A/V294A)	25	1.94891
CMK-1(V292A/V294A)	25	2.03768
CMK-1(V292A/V294A)	25	2.08449
CMK-1(V292A/V294A)	25	2.29367
CMK-1(V292A/V294A)	25	2.35353
CMK-1(V292A/V294A)	25	2.40101
CMK-1(V292A/V294A)	25	2.7817
CMK-1(V292A/V294A)	15	0.690575
CMK-1(V292A/V294A)	15	0.988414
CMK-1(V292A/V294A)	15	1.02847
CMK-1(V292A/V294A)	15	1.09426
CMK-1(V292A/V294A)	15	1.21116
CMK-1(V292A/V294A)	15	1.21722
CMK-1(V292A/V294A)	15	1.21811
CMK-1(V292A/V294A)	15	1.23417
CMK-1(V292A/V294A)	15	1.2351
CMK-1(V292A/V294A)	15	1.25699
CMK-1(V292A/V294A)	15	1.30807
CMK-1(V292A/V294A)	15	1.33212
CMK-1(V292A/V294A)	15	1.3677
CMK-1(V292A/V294A)	15	1.3849
CMK-1(V292A/V294A)	15	1.4737
CMK-1(V292A/V294A)	15	1.59182
CMK-1(V292A/V294A)	15	1.59255
CMK-1(V292A/V294A)	15	1.61914
CMK-1(V292A/V294A)	15	1.6712
CMK-1(V292A/V294A)	15	1.83208
CMK-1(V292A/V294A)	15	1.93575
CMK-1(V292A/V294A)	15	1.99992
CMK-1(V292A/V294A)	15	2.01007
CMK-1(V292A/V294A)	15	2.04072
CMK-1(V292A/V294A)	15	2.21518
CMK-1(V292A/V294A)	15	2.48045
CMK-1(V292A/V294A)	15	2.53605
CMK-1(V292A/V294A)	15	2.5456
CMK-1(V292A/V294A)	15	2.84133
CMK-1(V292A/V294A)	15	2.95907
CMK-1(V292A/V294A)	15	3.01511
CMK-1(V292A/V294A)	25	0.482473
CMK-1(V292A/V294A)	25	0.684216
CMK-1(V292A/V294A)	25	0.746354
CMK-1(V292A/V294A)	25	0.873312
CMK-1(V292A/V294A)	25	0.947926
CMK-1(V292A/V294A)	25	1.00866
CMK-1(V292A/V294A)	25	1.00959
CMK-1(V292A/V294A)	25	1.01515
CMK-1(V292A/V294A)	25	1.029
CMK-1(V292A/V294A)	25	1.03287
CMK-1(V292A/V294A)	25	1.03531
CMK-1(V292A/V294A)	25	1.03889
CMK-1(V292A/V294A)	25	1.04491
CMK-1(V292A/V294A)	25	1.05107
CMK-1(V292A/V294A)	25	1.07185
CMK-1(V292A/V294A)	25	1.0759
CMK-1(V292A/V294A)	25	1.0921
CMK-1(V292A/V294A)	25	1.10535
CMK-1(V292A/V294A)	25	1.11042
CMK-1(V292A/V294A)	25	1.11226
CMK-1(V292A/V294A)	25	1.12389
CMK-1(V292A/V294A)	25	1.12656
CMK-1(V292A/V294A)	25	1.14278
CMK-1(V292A/V294A)	25	1.2031
CMK-1(V292A/V294A)	25	1.21216
CMK-1(V292A/V294A)	25	1.25685
CMK-1(V292A/V294A)	25	1.25904
CMK-1(V292A/V294A)	25	1.26214
CMK-1(V292A/V294A)	25	1.2677
CMK-1(V292A/V294A)	25	1.29728
CMK-1(V292A/V294A)	25	1.30524
CMK-1(V292A/V294A)	25	1.31739
CMK-1(V292A/V294A)	25	1.33882
CMK-1(V292A/V294A)	25	1.34355
CMK-1(V292A/V294A)	25	1.34876
CMK-1(V292A/V294A)	25	1.35531
CMK-1(V292A/V294A)	25	1.36735
CMK-1(V292A/V294A)	25	1.38305
CMK-1(V292A/V294A)	25	1.39777
CMK-1(V292A/V294A)	25	1.41578
CMK-1(V292A/V294A)	25	1.42757
CMK-1(V292A/V294A)	25	1.42824
CMK-1(V292A/V294A)	25	1.49799
CMK-1(V292A/V294A)	25	1.50345
CMK-1(V292A/V294A)	25	1.52185
CMK-1(V292A/V294A)	25	1.5352
CMK-1(V292A/V294A)	25	1.54039
CMK-1(V292A/V294A)	25	1.54199
CMK-1(V292A/V294A)	25	1.54439
CMK-1(V292A/V294A)	25	1.54443
CMK-1(V292A/V294A)	25	1.55081
CMK-1(V292A/V294A)	25	1.57754
CMK-1(V292A/V294A)	25	1.62313
CMK-1(V292A/V294A)	25	1.62542
CMK-1(V292A/V294A)	25	1.68682
CMK-1(V292A/V294A)	25	1.69061
CMK-1(V292A/V294A)	25	1.69851
CMK-1(V292A/V294A)	25	1.71273
CMK-1(V292A/V294A)	25	1.7356
CMK-1(V292A/V294A)	25	1.79599
CMK-1(V292A/V294A)	25	1.8529
CMK-1(V292A/V294A)	25	1.86292
CMK-1(V292A/V294A)	25	1.8959
CMK-1(V292A/V294A)	25	1.94972
CMK-1(V292A/V294A)	25	1.99986
CMK-1(V292A/V294A)	25	2.02038
CMK-1(V292A/V294A)	25	2.14313
CMK-1(V292A/V294A)	25	2.18158
CMK-1(V292A/V294A)	25	2.29005
CMK-1(V292A/V294A)	25	2.42871
CMK-1(V292A/V294A)	25	2.53061
CMK-1(V292A/V294A)	25	3.13502
CMK-1(V292A/V294A)	15	0.962089
CMK-1(V292A/V294A)	15	1.02446
CMK-1(V292A/V294A)	15	1.043
CMK-1(V292A/V294A)	15	1.0786
CMK-1(V292A/V294A)	15	1.10483
CMK-1(V292A/V294A)	15	1.14375
CMK-1(V292A/V294A)	15	1.1804
CMK-1(V292A/V294A)	15	1.18954
CMK-1(V292A/V294A)	15	1.19023
CMK-1(V292A/V294A)	15	1.20877
CMK-1(V292A/V294A)	15	1.21022
CMK-1(V292A/V294A)	15	1.21557
CMK-1(V292A/V294A)	15	1.24502
CMK-1(V292A/V294A)	15	1.29905
CMK-1(V292A/V294A)	15	1.30895
CMK-1(V292A/V294A)	15	1.31326
CMK-1(V292A/V294A)	15	1.3435
CMK-1(V292A/V294A)	15	1.34619
CMK-1(V292A/V294A)	15	1.35176
CMK-1(V292A/V294A)	15	1.3602
CMK-1(V292A/V294A)	15	1.36029
CMK-1(V292A/V294A)	15	1.37802
CMK-1(V292A/V294A)	15	1.37849
CMK-1(V292A/V294A)	15	1.38885
CMK-1(V292A/V294A)	15	1.40156
CMK-1(V292A/V294A)	15	1.40823
CMK-1(V292A/V294A)	15	1.4318
CMK-1(V292A/V294A)	15	1.44683
CMK-1(V292A/V294A)	15	1.47592
CMK-1(V292A/V294A)	15	1.48105
CMK-1(V292A/V294A)	15	1.48191
CMK-1(V292A/V294A)	15	1.48964
CMK-1(V292A/V294A)	15	1.49205
CMK-1(V292A/V294A)	15	1.49221
CMK-1(V292A/V294A)	15	1.51434
CMK-1(V292A/V294A)	15	1.51999
CMK-1(V292A/V294A)	15	1.52942
CMK-1(V292A/V294A)	15	1.543
CMK-1(V292A/V294A)	15	1.58388
CMK-1(V292A/V294A)	15	1.58875
CMK-1(V292A/V294A)	15	1.60136
CMK-1(V292A/V294A)	15	1.60854
CMK-1(V292A/V294A)	15	1.6186
CMK-1(V292A/V294A)	15	1.63075
CMK-1(V292A/V294A)	15	1.65952
CMK-1(V292A/V294A)	15	1.67669
CMK-1(V292A/V294A)	15	1.68247
CMK-1(V292A/V294A)	15	1.68584
CMK-1(V292A/V294A)	15	1.68836
CMK-1(V292A/V294A)	15	1.69004
CMK-1(V292A/V294A)	15	1.71416
CMK-1(V292A/V294A)	15	1.71425
CMK-1(V292A/V294A)	15	1.71705
CMK-1(V292A/V294A)	15	1.71713
CMK-1(V292A/V294A)	15	1.7238
CMK-1(V292A/V294A)	15	1.73813
CMK-1(V292A/V294A)	15	1.73833
CMK-1(V292A/V294A)	15	1.75265
CMK-1(V292A/V294A)	15	1.75572
CMK-1(V292A/V294A)	15	1.76184
CMK-1(V292A/V294A)	15	1.76627
CMK-1(V292A/V294A)	15	1.7714
CMK-1(V292A/V294A)	15	1.77776
CMK-1(V292A/V294A)	15	1.78286
CMK-1(V292A/V294A)	15	1.78764
CMK-1(V292A/V294A)	15	1.7986
CMK-1(V292A/V294A)	15	1.80436
CMK-1(V292A/V294A)	15	1.81034
CMK-1(V292A/V294A)	15	1.8139
CMK-1(V292A/V294A)	15	1.82304
CMK-1(V292A/V294A)	15	1.82308
CMK-1(V292A/V294A)	15	1.83275
CMK-1(V292A/V294A)	15	1.84908
CMK-1(V292A/V294A)	15	1.85394
CMK-1(V292A/V294A)	15	1.85923
CMK-1(V292A/V294A)	15	1.86897
CMK-1(V292A/V294A)	15	1.90262
CMK-1(V292A/V294A)	15	1.91036
CMK-1(V292A/V294A)	15	1.94325
CMK-1(V292A/V294A)	15	1.9577
CMK-1(V292A/V294A)	15	1.99021
CMK-1(V292A/V294A)	15	2.02808
CMK-1(V292A/V294A)	15	2.0355
CMK-1(V292A/V294A)	15	2.05448
CMK-1(V292A/V294A)	15	2.11421
CMK-1(V292A/V294A)	15	2.22434
CMK-1(V292A/V294A)	15	2.3002
CMK-1(V292A/V294A)	15	2.30995
CMK-1(V292A/V294A)	15	2.35277
CMK-1(V292A/V294A)	15	2.36282
CMK-1(V292A/V294A)	15	2.57959
CMK-1(V292A/V294A)	15	2.62229
CMK-1(V292A/V294A)	15	2.62665
CMK-1(V292A/V294A)	15	2.65965
CMK-1(V292A/V294A)	15	2.71891
CMK-1(V292A/V294A)	15	2.7844
CMK-1(V292A/V294A)	15	2.8657
CMK-1(V292A/V294A)	15	2.9251
CMK-1(V292A/V294A)	15	2.98869
CMK-1(V292A/V294A)	15	3.02893
CMK-1(V292A/V294A)	15	3.03472
CMK-1(V292A/V294A)	15	3.16676
CMK-1(V292A/V294A)	15	3.26825
CMK-1(V292A/V294A)	25	0.623411
CMK-1(V292A/V294A)	25	0.679715
CMK-1(V292A/V294A)	25	0.848558
CMK-1(V292A/V294A)	25	0.849998
CMK-1(V292A/V294A)	25	0.961924
CMK-1(V292A/V294A)	25	0.96758
CMK-1(V292A/V294A)	25	0.975737
CMK-1(V292A/V294A)	25	0.978104
CMK-1(V292A/V294A)	25	0.978852
CMK-1(V292A/V294A)	25	1.035
CMK-1(V292A/V294A)	25	1.05591
CMK-1(V292A/V294A)	25	1.06332
CMK-1(V292A/V294A)	25	1.07693
CMK-1(V292A/V294A)	25	1.08685
CMK-1(V292A/V294A)	25	1.08905
CMK-1(V292A/V294A)	25	1.14014
CMK-1(V292A/V294A)	25	1.14809
CMK-1(V292A/V294A)	25	1.16329
CMK-1(V292A/V294A)	25	1.17298
CMK-1(V292A/V294A)	25	1.19596
CMK-1(V292A/V294A)	25	1.20461
CMK-1(V292A/V294A)	25	1.20642
CMK-1(V292A/V294A)	25	1.20737
CMK-1(V292A/V294A)	25	1.22429
CMK-1(V292A/V294A)	25	1.22996
CMK-1(V292A/V294A)	25	1.25138
CMK-1(V292A/V294A)	25	1.26036
CMK-1(V292A/V294A)	25	1.27713
CMK-1(V292A/V294A)	25	1.28312
CMK-1(V292A/V294A)	25	1.304
CMK-1(V292A/V294A)	25	1.33607
CMK-1(V292A/V294A)	25	1.3387
CMK-1(V292A/V294A)	25	1.35845
CMK-1(V292A/V294A)	25	1.37051
CMK-1(V292A/V294A)	25	1.37276
CMK-1(V292A/V294A)	25	1.37282
CMK-1(V292A/V294A)	25	1.37413
CMK-1(V292A/V294A)	25	1.37789
CMK-1(V292A/V294A)	25	1.39667
CMK-1(V292A/V294A)	25	1.39831
CMK-1(V292A/V294A)	25	1.412
CMK-1(V292A/V294A)	25	1.42997
CMK-1(V292A/V294A)	25	1.44701
CMK-1(V292A/V294A)	25	1.46121
CMK-1(V292A/V294A)	25	1.46977
CMK-1(V292A/V294A)	25	1.47186
CMK-1(V292A/V294A)	25	1.48058
CMK-1(V292A/V294A)	25	1.48453
CMK-1(V292A/V294A)	25	1.49842
CMK-1(V292A/V294A)	25	1.50491
CMK-1(V292A/V294A)	25	1.51744
CMK-1(V292A/V294A)	25	1.51985
CMK-1(V292A/V294A)	25	1.55312
CMK-1(V292A/V294A)	25	1.55424
CMK-1(V292A/V294A)	25	1.56537
CMK-1(V292A/V294A)	25	1.57844
CMK-1(V292A/V294A)	25	1.59515
CMK-1(V292A/V294A)	25	1.59521
CMK-1(V292A/V294A)	25	1.61311
CMK-1(V292A/V294A)	25	1.62533
CMK-1(V292A/V294A)	25	1.62655
CMK-1(V292A/V294A)	25	1.63094
CMK-1(V292A/V294A)	25	1.63404
CMK-1(V292A/V294A)	25	1.66259
CMK-1(V292A/V294A)	25	1.69964
CMK-1(V292A/V294A)	25	1.7408
CMK-1(V292A/V294A)	25	1.78084
CMK-1(V292A/V294A)	25	1.81099
CMK-1(V292A/V294A)	25	1.83099
CMK-1(V292A/V294A)	25	1.84292
CMK-1(V292A/V294A)	25	1.85153
CMK-1(V292A/V294A)	25	1.86172
CMK-1(V292A/V294A)	25	1.86624
CMK-1(V292A/V294A)	25	1.88535
CMK-1(V292A/V294A)	25	1.92898
CMK-1(V292A/V294A)	25	1.98396
CMK-1(V292A/V294A)	25	2.05534
CMK-1(V292A/V294A)	25	2.07701
CMK-1(V292A/V294A)	25	2.10038
CMK-1(V292A/V294A)	25	2.14917
CMK-1(V292A/V294A)	25	2.19676
CMK-1(V292A/V294A)	25	2.36013
CMK-1(V292A/V294A)	25	2.37012
CMK-1(V292A/V294A)	25	2.40951
CMK-1(V292A/V294A)	25	2.43273
CMK-1(V292A/V294A)	25	2.47772
CMK-1(V292A/V294A)	25	2.50387
CMK-1(V292A/V294A)	25	2.59399
CMK-1(V292A/V294A)	25	2.70646
CMK-1(V292A/V294A)	25	2.71359
CMK-1(V292A/V294A)	25	2.94333
CMK-1(V292A/V294A)	25	3.46414
CMK-1(V292A/V294A)	25	3.52696
CMK-1(V292A/V294A)	25	3.89475
CMK-1(W305S)	15	0.27855
CMK-1(W305S)	15	0.309668
CMK-1(W305S)	15	0.315871
CMK-1(W305S)	15	0.344637
CMK-1(W305S)	15	0.362265
CMK-1(W305S)	15	0.364712
CMK-1(W305S)	15	0.366924
CMK-1(W305S)	15	0.375523
CMK-1(W305S)	15	0.381044
CMK-1(W305S)	15	0.381597
CMK-1(W305S)	15	0.418
CMK-1(W305S)	15	0.41948
CMK-1(W305S)	15	0.424147
CMK-1(W305S)	15	0.433213
CMK-1(W305S)	15	0.449789
CMK-1(W305S)	15	0.465319
CMK-1(W305S)	15	0.465469
CMK-1(W305S)	15	0.47566
CMK-1(W305S)	15	0.476705
CMK-1(W305S)	15	0.479332
CMK-1(W305S)	15	0.489573
CMK-1(W305S)	15	0.490992
CMK-1(W305S)	15	0.491433
CMK-1(W305S)	15	0.496306
CMK-1(W305S)	15	0.500707
CMK-1(W305S)	15	0.514786
CMK-1(W305S)	15	0.520205
CMK-1(W305S)	15	0.524406
CMK-1(W305S)	15	0.526127
CMK-1(W305S)	15	0.526652
CMK-1(W305S)	15	0.526931
CMK-1(W305S)	15	0.527347
CMK-1(W305S)	15	0.532882
CMK-1(W305S)	15	0.540469
CMK-1(W305S)	15	0.540844
CMK-1(W305S)	15	0.548921
CMK-1(W305S)	15	0.550672
CMK-1(W305S)	15	0.55769
CMK-1(W305S)	15	0.566913
CMK-1(W305S)	15	0.576792
CMK-1(W305S)	15	0.580792
CMK-1(W305S)	15	0.582884
CMK-1(W305S)	15	0.583303
CMK-1(W305S)	15	0.583338
CMK-1(W305S)	15	0.583885
CMK-1(W305S)	15	0.584187
CMK-1(W305S)	15	0.590288
CMK-1(W305S)	15	0.593165
CMK-1(W305S)	15	0.593551
CMK-1(W305S)	15	0.594446
CMK-1(W305S)	15	0.596588
CMK-1(W305S)	15	0.601265
CMK-1(W305S)	15	0.606625
CMK-1(W305S)	15	0.616898
CMK-1(W305S)	15	0.617428
CMK-1(W305S)	15	0.632643
CMK-1(W305S)	15	0.634851
CMK-1(W305S)	15	0.637438
CMK-1(W305S)	15	0.644013
CMK-1(W305S)	15	0.647483
CMK-1(W305S)	15	0.647965
CMK-1(W305S)	15	0.653877
CMK-1(W305S)	15	0.654716
CMK-1(W305S)	15	0.658271
CMK-1(W305S)	15	0.664528
CMK-1(W305S)	15	0.672784
CMK-1(W305S)	15	0.685
CMK-1(W305S)	15	0.691535
CMK-1(W305S)	15	0.695672
CMK-1(W305S)	15	0.696599
CMK-1(W305S)	15	0.701706
CMK-1(W305S)	15	0.705208
CMK-1(W305S)	15	0.706261
CMK-1(W305S)	15	0.732541
CMK-1(W305S)	15	0.734563
CMK-1(W305S)	15	0.745684
CMK-1(W305S)	15	0.760285
CMK-1(W305S)	15	0.769483
CMK-1(W305S)	15	0.777778
CMK-1(W305S)	15	0.783928
CMK-1(W305S)	15	0.789917
CMK-1(W305S)	15	0.793021
CMK-1(W305S)	15	0.799933
CMK-1(W305S)	15	0.80215
CMK-1(W305S)	15	0.805873
CMK-1(W305S)	15	0.80906
CMK-1(W305S)	15	0.809298
CMK-1(W305S)	15	0.815401
CMK-1(W305S)	15	0.820515
CMK-1(W305S)	15	0.823499
CMK-1(W305S)	15	0.823887
CMK-1(W305S)	15	0.845816
CMK-1(W305S)	15	0.875992
CMK-1(W305S)	15	0.878896
CMK-1(W305S)	15	0.881044
CMK-1(W305S)	15	0.881326
CMK-1(W305S)	15	0.888828
CMK-1(W305S)	15	0.892698
CMK-1(W305S)	15	0.919221
CMK-1(W305S)	15	0.978
CMK-1(W305S)	15	1.00884
CMK-1(W305S)	15	1.01084
CMK-1(W305S)	15	1.02127
CMK-1(W305S)	15	1.04541
CMK-1(W305S)	15	1.05791
CMK-1(W305S)	15	1.1381
CMK-1(W305S)	15	1.17623
CMK-1(W305S)	15	1.29633
CMK-1(W305S)	15	2.54615
CMK-1(W305S)	25	0.145737
CMK-1(W305S)	25	0.158369
CMK-1(W305S)	25	0.290351
CMK-1(W305S)	25	0.328552
CMK-1(W305S)	25	0.335499
CMK-1(W305S)	25	0.34432
CMK-1(W305S)	25	0.365048
CMK-1(W305S)	25	0.375698
CMK-1(W305S)	25	0.376847
CMK-1(W305S)	25	0.388125
CMK-1(W305S)	25	0.393776
CMK-1(W305S)	25	0.3987
CMK-1(W305S)	25	0.419651
CMK-1(W305S)	25	0.425055
CMK-1(W305S)	25	0.428949
CMK-1(W305S)	25	0.439194
CMK-1(W305S)	25	0.446238
CMK-1(W305S)	25	0.453197
CMK-1(W305S)	25	0.455406
CMK-1(W305S)	25	0.463445
CMK-1(W305S)	25	0.463797
CMK-1(W305S)	25	0.466345
CMK-1(W305S)	25	0.466597
CMK-1(W305S)	25	0.467286
CMK-1(W305S)	25	0.479957
CMK-1(W305S)	25	0.490218
CMK-1(W305S)	25	0.507861
CMK-1(W305S)	25	0.510668
CMK-1(W305S)	25	0.510752
CMK-1(W305S)	25	0.514089
CMK-1(W305S)	25	0.514873
CMK-1(W305S)	25	0.518293
CMK-1(W305S)	25	0.518459
CMK-1(W305S)	25	0.523608
CMK-1(W305S)	25	0.52401
CMK-1(W305S)	25	0.525574
CMK-1(W305S)	25	0.526731
CMK-1(W305S)	25	0.528281
CMK-1(W305S)	25	0.531804
CMK-1(W305S)	25	0.535261
CMK-1(W305S)	25	0.536639
CMK-1(W305S)	25	0.541963
CMK-1(W305S)	25	0.543057
CMK-1(W305S)	25	0.546866
CMK-1(W305S)	25	0.54908
CMK-1(W305S)	25	0.550146
CMK-1(W305S)	25	0.552741
CMK-1(W305S)	25	0.556429
CMK-1(W305S)	25	0.557412
CMK-1(W305S)	25	0.565049
CMK-1(W305S)	25	0.566058
CMK-1(W305S)	25	0.568288
CMK-1(W305S)	25	0.571939
CMK-1(W305S)	25	0.572459
CMK-1(W305S)	25	0.576329
CMK-1(W305S)	25	0.578089
CMK-1(W305S)	25	0.586051
CMK-1(W305S)	25	0.589202
CMK-1(W305S)	25	0.593925
CMK-1(W305S)	25	0.597193
CMK-1(W305S)	25	0.601527
CMK-1(W305S)	25	0.601554
CMK-1(W305S)	25	0.614716
CMK-1(W305S)	25	0.619495
CMK-1(W305S)	25	0.621824
CMK-1(W305S)	25	0.622003
CMK-1(W305S)	25	0.622197
CMK-1(W305S)	25	0.626577
CMK-1(W305S)	25	0.628041
CMK-1(W305S)	25	0.637555
CMK-1(W305S)	25	0.643256
CMK-1(W305S)	25	0.650818
CMK-1(W305S)	25	0.658865
CMK-1(W305S)	25	0.662032
CMK-1(W305S)	25	0.663918
CMK-1(W305S)	25	0.665327
CMK-1(W305S)	25	0.667854
CMK-1(W305S)	25	0.670823
CMK-1(W305S)	25	0.672104
CMK-1(W305S)	25	0.672173
CMK-1(W305S)	25	0.673927
CMK-1(W305S)	25	0.678189
CMK-1(W305S)	25	0.678697
CMK-1(W305S)	25	0.678895
CMK-1(W305S)	25	0.678935
CMK-1(W305S)	25	0.680095
CMK-1(W305S)	25	0.683738
CMK-1(W305S)	25	0.685659
CMK-1(W305S)	25	0.6915
CMK-1(W305S)	25	0.691653
CMK-1(W305S)	25	0.696332
CMK-1(W305S)	25	0.696923
CMK-1(W305S)	25	0.69901
CMK-1(W305S)	25	0.70043
CMK-1(W305S)	25	0.701748
CMK-1(W305S)	25	0.702884
CMK-1(W305S)	25	0.704437
CMK-1(W305S)	25	0.709863
CMK-1(W305S)	25	0.724528
CMK-1(W305S)	25	0.742771
CMK-1(W305S)	25	0.743605
CMK-1(W305S)	25	0.74909
CMK-1(W305S)	25	0.755312
CMK-1(W305S)	25	0.755908
CMK-1(W305S)	25	0.7661
CMK-1(W305S)	25	0.780853
CMK-1(W305S)	25	0.789667
CMK-1(W305S)	25	0.794634
CMK-1(W305S)	25	0.799205
CMK-1(W305S)	25	0.806344
CMK-1(W305S)	25	0.811835
CMK-1(W305S)	25	0.816848
CMK-1(W305S)	25	0.81687
CMK-1(W305S)	25	0.820111
CMK-1(W305S)	25	0.821091
CMK-1(W305S)	25	0.829759
CMK-1(W305S)	25	0.84898
CMK-1(W305S)	25	0.850563
CMK-1(W305S)	25	0.852898
CMK-1(W305S)	25	0.86117
CMK-1(W305S)	25	0.867921
CMK-1(W305S)	25	0.869493
CMK-1(W305S)	25	0.889307
CMK-1(W305S)	25	0.889829
CMK-1(W305S)	25	0.895327
CMK-1(W305S)	25	0.90199
CMK-1(W305S)	25	0.921366
CMK-1(W305S)	25	0.9249
CMK-1(W305S)	25	0.927355
CMK-1(W305S)	25	0.94821
CMK-1(W305S)	25	0.952143
CMK-1(W305S)	25	0.957854
CMK-1(W305S)	25	0.972957
CMK-1(W305S)	25	0.973785
CMK-1(W305S)	25	0.988668
CMK-1(W305S)	25	0.996424
CMK-1(W305S)	25	1.00904
CMK-1(W305S)	15	0.210692
CMK-1(W305S)	15	0.350113
CMK-1(W305S)	15	0.368557
CMK-1(W305S)	15	0.37898
CMK-1(W305S)	15	0.379092
CMK-1(W305S)	15	0.386301
CMK-1(W305S)	15	0.387259
CMK-1(W305S)	15	0.428297
CMK-1(W305S)	15	0.429799
CMK-1(W305S)	15	0.449617
CMK-1(W305S)	15	0.476721
CMK-1(W305S)	15	0.477073
CMK-1(W305S)	15	0.479714
CMK-1(W305S)	15	0.491173
CMK-1(W305S)	15	0.49624
CMK-1(W305S)	15	0.520903
CMK-1(W305S)	15	0.528869
CMK-1(W305S)	15	0.536369
CMK-1(W305S)	15	0.539792
CMK-1(W305S)	15	0.543168
CMK-1(W305S)	15	0.567092
[truncated: 3,111 more rows]
